# Supplementary material for: Synthesis, in silico modelling, and in vitro biological evaluation of substituted pyrazole derivatives as potential anti-skin cancer, anti-tyrosinase, and antioxidant agents
Source: PubMed Central journal article supplement (PMC10187093; doi:10.1080/14756366.2023.2205042), 2023-05-15
Supplement: IENZ_A_2205042_SM9701.pdf [file IENZ_A_2205042_SM9701.pdf]

# Supplementary Information

## Synthesis, *In-Silico* Modelling and *In-Vitro* Biological Evaluation of Substituted Pyrazole Derivatives as Potential Anti-Skin Cancer, Anti-Tyrosinase, and Antioxidant Agents

Samuel T. Boateng<sup>a, ‡</sup>, Tithi Roy<sup>a, ‡</sup>, Kara Torrey<sup>b, ‡</sup>, Uchechi Owunna<sup>c</sup>, Sergette Banang-Mbeumi<sup>a,d</sup>, David Basnet<sup>c</sup>, Eleonora Niedda<sup>e</sup>, Alexis D. Alexander<sup>a</sup>, Denzel El Hage<sup>c</sup>, Siriki Atchimnaidu<sup>c</sup>, Bolni Marius Nagalo<sup>f,g</sup>, Dinesh Aryal<sup>a, h</sup>, Ann Findley<sup>c</sup>, Navindra P. Seeram<sup>b</sup>, Tatiana Efimova<sup>i</sup>, Mario Sechi<sup>e</sup>, Ronald A. Hill<sup>a</sup>, Hang Ma<sup>b</sup>, Jean Christopher Chamcheu<sup>a,\*</sup>, Siva Murru<sup>c,\*</sup>

<sup>a</sup>. School of Basic Pharmaceutical and Toxicological Sciences, College of Pharmacy, University of Louisiana at Monroe, Monroe, LA 71209-0497, USA;

<sup>b</sup>. Bioactive Botanical Research Laboratory, Department of Biomedical and Pharmaceutical Sciences, College of Pharmacy, University of Rhode Island, Kingston, RI 02881, USA;

<sup>c</sup>. School of Sciences, College of Arts, Education and Sciences, University of Louisiana at Monroe, Monroe, LA 71209-0497, USA;

<sup>d</sup>. School of Nursing and Allied Health Sciences, Louisiana Delta Community College, Monroe, LA 71203, USA.

<sup>e</sup> Department of Medicine, Surgery and Pharmacy, University of Sassari, 07100 Sassari, Italy;

<sup>f</sup>. Department of Pathology, University of Arkansas for Medical Sciences (UAMS), Little Rock, AR, USA

<sup>g</sup>. The Winthrop P. Rockefeller Cancer Institute, UAMS, Little Rock, AR, USA

<sup>h</sup>. Edward Via College of Osteopathic Medicine, Department of Biomedical Affairs and Research, 4408 Bon Aire Drive, Monroe, LA 71203

<sup>i</sup>. Department of Biomedical Engineering, Northwestern University, Chicago, IL 60611, USA

**Running Title:** Identification of potent anticancer, antioxidant and anti-tyrosinase pyrazole derivatives

<sup>‡</sup> These authors contributed equally to this work.

**\* Corresponding authors:**

Dr. Jean Christopher Chamcheu School of Basic Pharmaceutical and Toxicological Sciences, College of Pharmacy, University of Louisiana - Monroe, 800 Bienville Drive, Room 362, Monroe, LA 71209-0497, USA. Phone: 318-342-6820, Fax: (318) 342 1737; Email: [chamcheu@ulm.edu](mailto:chamcheu@ulm.edu); (ORCID <https://orcid.org/0000-0002-3927-5664>)

Dr. Siva Murru, School of Sciences, College of Arts, Education and Sciences, University of Louisiana at Monroe, Monroe, LA 71209-0497, USA; *E-mail*: [murru@ulm.edu](mailto:murru@ulm.edu); Phone: 318-342-7966; ORCID <https://orcid.org/0000-0002-1956-3079>.

**Table of Contents**

Pages

|                                                                                                                                         |       |
|-----------------------------------------------------------------------------------------------------------------------------------------|-------|
| 1. <b>Table S1:</b> The IC <sub>50</sub> data from the mushroom tyrosinase inhibitory assay screening of P1-P25.                        | 3     |
| 2. <b>Table S2:</b> Physicochemical properties of P1-P25.                                                                               | 4     |
| 3. <b>Table S3:</b> Physicochemical, pharmacokinetics (SwissADME), and toxicological properties of synthesized compounds.               | 5-6   |
| 4. <b>Table S4:</b> The IC <sub>50</sub> data from the dose dependent DPPH antioxidant activity screening of selected active compounds. | 7     |
| 5. <b>Table S5:</b> Computational prediction of some pharmacokinetic properties of P1-P25                                               | 8-9   |
| 6. <b>Table S6:</b> Catalysts and solvents screening for the synthesis ofazole compounds.                                               | 10    |
| 7. <sup>1</sup> H- and <sup>13</sup> C-NMR, and High-Resolution Mass Spectra.                                                           | 11-96 |

**Table S1.** The summary IC<sub>50</sub> values of mushroom tyrosinase inhibition assay of pyrazoles, pyrazolones, isoxazoles and positive control drugs P1-P25 > 500 = IC<sub>50</sub> Value is greater than 500 μM, and therefore not biologically relevant.

| <b>Sample Identity</b> | <b>IC<sub>50</sub> Value (μM)</b> |
|------------------------|-----------------------------------|
| P1                     | > 500                             |
| P2                     | > 500                             |
| P3                     | > 500                             |
| P4                     | 196.9                             |
| P5                     | > 500                             |
| P6                     | > 500                             |
| P7                     | > 500                             |
| P8                     | 190.4                             |
| P9                     | > 500                             |
| P10                    | > 500                             |
| P11                    | 172.8                             |
| P12                    | 335.5                             |
| P13                    | > 500                             |
| P14                    | 15.9                              |
| P15                    | > 500                             |
| P16                    | > 500                             |
| P17                    | 165.4                             |
| P18                    | 156.0                             |
| P19                    | > 500                             |
| P20                    | > 500                             |
| P21                    | 294.8                             |
| P22                    | > 500                             |
| P23                    | > 500                             |
| P24                    | > 500                             |
| P25                    | > 500                             |
| Arbutin                | 91                                |
| Kojic acid             | 31                                |

**Table S2.** Physicochemical properties of pyrazoles, pyrazolones, and isoxazoles P1-25

| <b>Compounds</b> | <b>MW</b> | <b>#Heavy atoms</b> | <b>#Aromatic heavy atoms</b> | <b>Fraction Csp3</b> | <b>#Rotatable bonds</b> |  | <b>#H-bond acceptors</b> | <b>#H-bond donors</b> | <b>MR</b> |
|------------------|-----------|---------------------|------------------------------|----------------------|-------------------------|--|--------------------------|-----------------------|-----------|
| <b>P1</b>        | 124.18    | 9                   | 5                            | 0.57                 | 1                       |  | 1                        | 1                     | 38.29     |
| <b>P2</b>        | 122.17    | 9                   | 5                            | 0.57                 | 0                       |  | 1                        | 1                     | 36.18     |
| <b>P3</b>        | 158.2     | 12                  | 6                            | 0.2                  | 1                       |  | 2                        | 0                     | 57.74     |
| <b>P4</b>        | 192.64    | 13                  | 11                           | 0.1                  | 1                       |  | 1                        | 1                     | 54        |
| <b>P5</b>        | 184.24    | 14                  | 11                           | 0.25                 | 0                       |  | 1                        | 1                     | 56.81     |
| <b>P6</b>        | 182.22    | 14                  | 13                           | 0.08                 | 0                       |  | 1                        | 1                     | 58.57     |
| <b>P7</b>        | 200.28    | 15                  | 11                           | 0.31                 | 2                       |  | 1                        | 0                     | 63.27     |
| <b>P8</b>        | 198.26    | 15                  | 11                           | 0.31                 | 1                       |  | 1                        | 0                     | 61.16     |
| <b>P9</b>        | 260.33    | 20                  | 17                           | 0.17                 | 1                       |  | 1                        | 0                     | 81.78     |
| <b>P10</b>       | 244.29    | 18                  | 11                           | 0.29                 | 4                       |  | 3                        | 0                     | 69.58     |
| <b>P11</b>       | 159.18    | 12                  | 11                           | 0.1                  | 1                       |  | 2                        | 0                     | 46.91     |
| <b>P12</b>       | 185.22    | 14                  | 11                           | 0.25                 | 0                       |  | 2                        | 0                     | 54.72     |
| <b>P13</b>       | 296.37    | 23                  | 23                           | 0                    | 3                       |  | 1                        | 0                     | 94.44     |
| <b>P14</b>       | 234.3     | 18                  | 17                           | 0.06                 | 2                       |  | 1                        | 0                     | 73.97     |
| <b>P15</b>       | 288.27    | 21                  | 17                           | 0.06                 | 3                       |  | 4                        | 0                     | 74        |
| <b>P16</b>       | 313.19    | 19                  | 17                           | 0.06                 | 2                       |  | 1                        | 0                     | 81.67     |
| <b>P17</b>       | 268.74    | 19                  | 17                           | 0.06                 | 2                       |  | 1                        | 0                     | 78.98     |
| <b>P18</b>       | 264.32    | 20                  | 17                           | 0.12                 | 3                       |  | 2                        | 0                     | 80.46     |
| <b>P19</b>       | 313.37    | 22                  | 17                           | 0.06                 | 3                       |  | 4                        | 1                     | 84.96     |
| <b>P20</b>       | 188.23    | 14                  | 6                            | 0.27                 | 1                       |  | 2                        | 0                     | 63.1      |
| <b>P21</b>       | 236.27    | 18                  | 12                           | 0.07                 | 2                       |  | 2                        | 0                     | 77.98     |
| <b>P22</b>       | 394.06    | 20                  | 12                           | 0.07                 | 2                       |  | 2                        | 0                     | 93.37     |
| <b>P23</b>       | 383.16    | 23                  | 12                           | 0.12                 | 3                       |  | 5                        | 0                     | 90.68     |
| <b>P24</b>       | 315.16    | 19                  | 12                           | 0.07                 | 2                       |  | 2                        | 0                     | 85.67     |
| <b>P25</b>       | 315.16    | 19                  | 12                           | 0.07                 | 2                       |  | 2                        | 0                     | 85.67     |

**Table S3:** Physicochemical, pharmacokinetics (SwissADME), and toxicologic properties of the synthesized compounds.

| Comp. |             |       | Lipophilicity |            |           |           |                        |                   | Drug-likeness<br>(number of violations) |       |       |      |        | Water Solubility |                 | Pharmacokinetics    |      |
|-------|-------------|-------|---------------|------------|-----------|-----------|------------------------|-------------------|-----------------------------------------|-------|-------|------|--------|------------------|-----------------|---------------------|------|
|       | MW<br>g/mol | TPSA  | ilogP         | Xlog<br>P3 | Wlog<br>P | Mlog<br>P | Silicos<br>-IT<br>logP | Consensus<br>logP | Lipinski                                | Ghose | Veber | Egan | Muegge | ESOL<br>Log S    | ESOL<br>Class   | Log $K_p$<br>(cm/s) | F    |
| 1     | 124.18      | 28.68 | 1.32          | 1.81       | 1.59      | 1.08      | 2.55                   | 1.67              | 0                                       | 2     | 0     | 0    | 1      | -2.1             | Soluble         | -5.77               | 0.55 |
| 2     | 122.17      | 28.68 | 1.23          | 1.3        | 1.21      | 1.08      | 2.65                   | 1.49              | 0                                       | 3     | 0     | 0    | 1      | -1.83            | Very<br>soluble | -6.12               | 0.55 |
| 3     | 158.2       | 24.72 | 1.69          | 1.76       | 1.49      | 1.81      | 3.79                   | 2.11              | 0                                       | 1     | 0     | 0    | 1      | -2.23            | Soluble         | -6.02               | 0.55 |
| 4     | 192.64      | 28.68 | 1.75          | 2.91       | 3.04      | 2.33      | 3.66                   | 2.74              | 0                                       | 0     | 0     | 0    | 1      | -3.43            | Soluble         | -5.41               | 0.55 |
| 5     | 184.24      | 28.68 | 1.64          | 2.57       | 2.48      | 2.34      | 3.7                    | 2.55              | 0                                       | 0     | 0     | 0    | 1      | -3.18            | Soluble         | -5.6                | 0.55 |
| 6     | 182.22      | 28.68 | 1.63          | 3.2        | 3.02      | 2.45      | 3.53                   | 2.77              | 0                                       | 0     | 0     | 0    | 1      | -3.67            | Soluble         | -5.14               | 0.55 |
| 7     | 200.28      | 17.82 | 2.74          | 3.49       | 3.05      | 2.88      | 3.27                   | 3.09              | 1                                       | 0     | 0     | 0    | 0      | -3.69            | Soluble         | -5.04               | 0.55 |
| 8     | 198.26      | 17.82 | 2.56          | 2.98       | 2.67      | 2.88      | 3.13                   | 2.84              | 0                                       | 0     | 0     | 0    | 1      | -3.42            | Soluble         | -5.39               | 0.55 |
| 9     | 260.33      | 17.82 | 3.07          | 4.25       | 3.95      | 3.89      | 4.19                   | 3.87              | 0                                       | 0     | 0     | 0    | 0      | -4.69            | Moderate        | -4.87               | 0.55 |
| 10    | 244.29      | 44.12 | 2.99          | 3.13       | 2.67      | 2.41      | 2.69                   | 2.78              | 0                                       | 0     | 0     | 0    | 0      | -3.51            | Soluble         | -5.57               | 0.55 |
| 11    | 159.18      | 26.03 | 2.22          | 2.43       | 2.65      | 1.77      | 2.93                   | 2.4               | 0                                       | 1     | 0     | 0    | 1      | -2.97            | Soluble         | -5.55               | 0.55 |
| 12    | 185.22      | 26.03 | 2.39          | 2.73       | 2.75      | 2.34      | 3.57                   | 2.76              | 0                                       | 0     | 0     | 0    | 1      | -3.29            | Soluble         | -5.49               | 0.55 |
| 13    | 296.37      | 17.82 | 3.4           | 5.22       | 5.21      | 4.35      | 4.58                   | 4.55              | 1                                       | 0     | 0     | 0    | 1      | -5.51            | Moderate        | -4.4                | 0.55 |
| 14    | 234.3       | 17.82 | 2.91          | 3.95       | 3.85      | 3.41      | 3.55                   | 3.53              | 0                                       | 0     | 0     | 0    | 0      | -4.35            | Moderate        | -4.92               | 0.55 |
| 15    | 288.27      | 17.82 | 2.94          | 4.47       | 5.71      | 4.04      | 4.02                   | 4.24              | 0                                       | 1     | 0     | 0    | 0      | -4.84            | Moderate        | -4.88               | 0.55 |
| 16    | 313.19      | 17.82 | 3.3           | 4.64       | 4.61      | 4.04      | 4.19                   | 4.16              | 0                                       | 0     | 0     | 0    | 0      | -5.24            | Moderate        | -4.92               | 0.55 |
| 17    | 268.74      | 17.82 | 3.18          | 4.58       | 4.5       | 3.92      | 4.16                   | 4.07              | 0                                       | 0     | 0     | 0    | 0      | -4.92            | Moderate        | -4.69               | 0.55 |
| 18    | 264.32      | 27.05 | 3.23          | 3.92       | 3.86      | 3.04      | 3.55                   | 3.52              | 0                                       | 0     | 0     | 0    | 0      | -4.38            | Moderate        | -5.13               | 0.55 |
| 19    | 313.37      | 86.36 | 2.21          | 2.52       | 3.58      | 1.78      | 1.58                   | 2.33              | 0                                       | 0     | 0     | 0    | 0      | -3.74            | Soluble         | -6.42               | 0.55 |
| 20    | 188.23      | 32.67 | 2.3           | 1.84       | 1.28      | 1.89      | 2.24                   | 1.91              | 0                                       | 0     | 0     | 0    | 1      | -2.42            | Soluble         | -6.14               | 0.55 |
| 21    | 236.27      | 32.67 | 2.55          | 2.93       | 2.07      | 2.73      | 3.27                   | 2.71              | 1                                       | 0     | 0     | 0    | 0      | -3.51            | Soluble         | -5.66               | 0.55 |
| 22    | 394.06      | 32.67 | 3.3           | 4.31       | 3.59      | 3.99      | 4.57                   | 3.95              | 0                                       | 0     | 0     | 0    | 0      | -5.31            | Moderate        | -5.64               | 0.55 |

|                                                                                                                                                                                                                                                                                                                                                                                            |        |       |      |      |      |      |      |      |   |   |   |   |   |       |          |       |      |
|--------------------------------------------------------------------------------------------------------------------------------------------------------------------------------------------------------------------------------------------------------------------------------------------------------------------------------------------------------------------------------------------|--------|-------|------|------|------|------|------|------|---|---|---|---|---|-------|----------|-------|------|
| <b>23</b>                                                                                                                                                                                                                                                                                                                                                                                  | 383.16 | 32.67 | 3.19 | 4.5  | 5    | 4.22 | 4.91 | 4.37 | 1 | 0 | 0 | 0 | 0 | -5.24 | Moderate | -5.44 | 0.55 |
| <b>24</b>                                                                                                                                                                                                                                                                                                                                                                                  | 315.16 | 32.67 | 2.9  | 3.62 | 2.83 | 3.37 | 3.92 | 3.33 | 0 | 0 | 0 | 0 | 0 | -4.41 | Moderate | -5.65 | 0.55 |
| <b>25</b>                                                                                                                                                                                                                                                                                                                                                                                  | 315.16 | 32.67 | 2.96 | 3.62 | 2.83 | 3.37 | 3.92 | 3.34 | 0 | 0 | 0 | 0 | 0 | -4.41 | Moderate | -5.65 | 0.55 |
| Molecular weight (MW), LogP values (an indicator of lipophilicity), aqueous solubility parameters (ESOL), an indicator of skin permeation (Log $K_p$ ), and bioavailability score (F)<br>HBA: number of hydrogen bond acceptor; HBD: number of hydrogen bond donor, LogP: partition coefficient; LogS: lipophilicity of water; PSA: total polar surface area; RO5:<br>Lipinski's rule of 5 |        |       |      |      |      |      |      |      |   |   |   |   |   |       |          |       |      |

**Table S4.** Summary IC<sub>50</sub> data of the DPPH antioxidant activity screening of pyrazoles, pyrazolones and isoxazoles drugs P1-P25. N.A. = No Activity, > 1000 = IC<sub>50</sub> Value is greater than 1000 μM, and therefore not biologically relevant.

| Sample Identity | IC <sub>50</sub> Value (μM) |
|-----------------|-----------------------------|
| P1              | > 1000                      |
| P2              | N.A.                        |
| P3              | N.A.                        |
| P4              | N.A.                        |
| P5              | N.A.                        |
| P6              | 30.56                       |
| P7              | > 1000                      |
| P8              | N.A.                        |
| P9              | >1000                       |
| P10             | N.A.                        |
| P11             | N.A.                        |
| P12             | N.A.                        |
| P13             | >1000                       |
| P14             | N.A.                        |
| P15             | N.A.                        |
| P16             | N.A.                        |
| P17             | N.A.                        |
| P18             | N.A.                        |
| P19             | N.A.                        |
| P20             | N.A.                        |
| P21             | 354.5                       |
| P22             | 276.3                       |
| P23             | 196.4                       |
| P24             | 444.4                       |
| P25             | 189.6                       |

**Table S5.** Computational prediction of some pharmacokinetic properties of the pyrazoles, pyrazolones, and isoxazoles P1-P25.



| Compound | GI absorption | BBB permeant | Pgp substrate | CYP1A2 inhibitor | CYP2C19 inhibitor | CYP2C9 inhibitor | CYP2D6 inhibitor | CYP3A4 inhibitor |
|----------|---------------|--------------|---------------|------------------|-------------------|------------------|------------------|------------------|
| P1       | High          | Yes          | No            | No               | No                | No               | No               | No               |
| P2       | High          | Yes          | Yes           | No               | No                | No               | No               | No               |
| P3       | High          | Yes          | No            | Yes              | No                | No               | No               | No               |
| P4       | High          | Yes          | No            | Yes              | No                | No               | No               | No               |
| P5       | High          | Yes          | Yes           | Yes              | No                | No               | No               | No               |
| P6       | High          | Yes          | Yes           | Yes              | No                | No               | No               | No               |
| P7       | High          | Yes          | No            | Yes              | Yes               | No               | Yes              | No               |
| P8       | High          | Yes          | Yes           | Yes              | No                | No               | No               | No               |
| P9       | High          | Yes          | Yes           | Yes              | Yes               | No               | Yes              | No               |
| P10      | High          | Yes          | No            | Yes              | Yes               | Yes              | No               | No               |
| P11      | High          | Yes          | No            | Yes              | No                | No               | No               | No               |
| P12      | High          | Yes          | Yes           | Yes              | No                | No               | No               | No               |
| P13      | High          | Yes          | Yes           | Yes              | Yes               | No               | Yes              | Yes              |
| P4       | High          | Yes          | No            | Yes              | Yes               | No               | Yes              | No               |
| P15      | High          | No           | No            | Yes              | Yes               | No               | Yes              | No               |
| P16      | High          | Yes          | No            | Yes              | Yes               | Yes              | Yes              | No               |
| P17      | High          | Yes          | No            | Yes              | Yes               | Yes              | Yes              | No               |
| P18      | High          | Yes          | No            | Yes              | Yes               | Yes              | Yes              | Yes              |
| P19      | High          | No           | No            | Yes              | No                | No               | No               | Yes              |
| P20      | High          | Yes          | No            | Yes              | No                | No               | No               | No               |
| P21      | High          | Yes          | No            | Yes              | Yes               | No               | No               | No               |
| P22      | High          | Yes          | No            | Yes              | Yes               | Yes              | No               | No               |
| P23      | High          | Yes          | No            | Yes              | Yes               | Yes              | No               | No               |
| P24      | High          | Yes          | No            | Yes              | Yes               | Yes              | No               | No               |
| P25      | High          | Yes          | No            | Yes              | Yes               | Yes              | No               | No               |

**Table S6.** Screening of Base-metal catalysts with different solvents

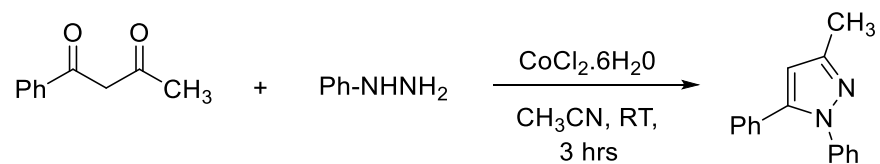

| S. No. | Catalyst                                                           | Solvent                         | % Yield |
|--------|--------------------------------------------------------------------|---------------------------------|---------|
| 1      | Ni <sup>II</sup> Cl <sub>2</sub>                                   | CH <sub>3</sub> CN              | 53      |
| 2      | Ni <sup>II</sup> (OTf) <sub>2</sub>                                | CH <sub>3</sub> CN              | 43      |
| 3      | Ni <sup>II</sup> (acac) <sub>2</sub>                               | CH <sub>3</sub> CN              | 69      |
| 4      | Co <sup>II</sup> Cl <sub>2</sub> ·6H <sub>2</sub> O                | CH <sub>3</sub> CN              | ~100    |
| 5      | Co <sup>II</sup> SO <sub>4</sub>                                   | CH <sub>3</sub> CN              | 94      |
| 6      | Cu <sup>II</sup> (BF <sub>4</sub> ) <sub>2</sub> ·H <sub>2</sub> O | CH <sub>3</sub> CN              | 90      |
| 7      | Cu <sup>II</sup> (OTf) <sub>2</sub>                                | CH <sub>3</sub> CN              | 94      |
| 8      | No catalyst                                                        | CH <sub>3</sub> CN              | 11      |
| 9      | Co <sup>II</sup> Cl <sub>2</sub> ·6H <sub>2</sub> O                | CH <sub>2</sub> Cl <sub>2</sub> | 94      |
| 10     | Co <sup>II</sup> Cl <sub>2</sub> ·6H <sub>2</sub> O                | Dioxane                         | 86      |
| 11     | Co <sup>II</sup> Cl <sub>2</sub> ·6H <sub>2</sub> O                | DMF                             | 60      |
| 12     | Co <sup>II</sup> Cl <sub>2</sub> ·6H <sub>2</sub> O                | Methanol                        | >99     |

<sup>1</sup>H- and <sup>13</sup>C-NMR, and Mass Spectra of the Products P1-P19. We confirmed the products P20-P25 by comparing the data we reported earlier (ref#79 in the manuscript).

#### 4-ethyl-3,5-dimethyl-1H-pyrazole (P1): <sup>1</sup>H-NMR (CDCl<sub>3</sub>)

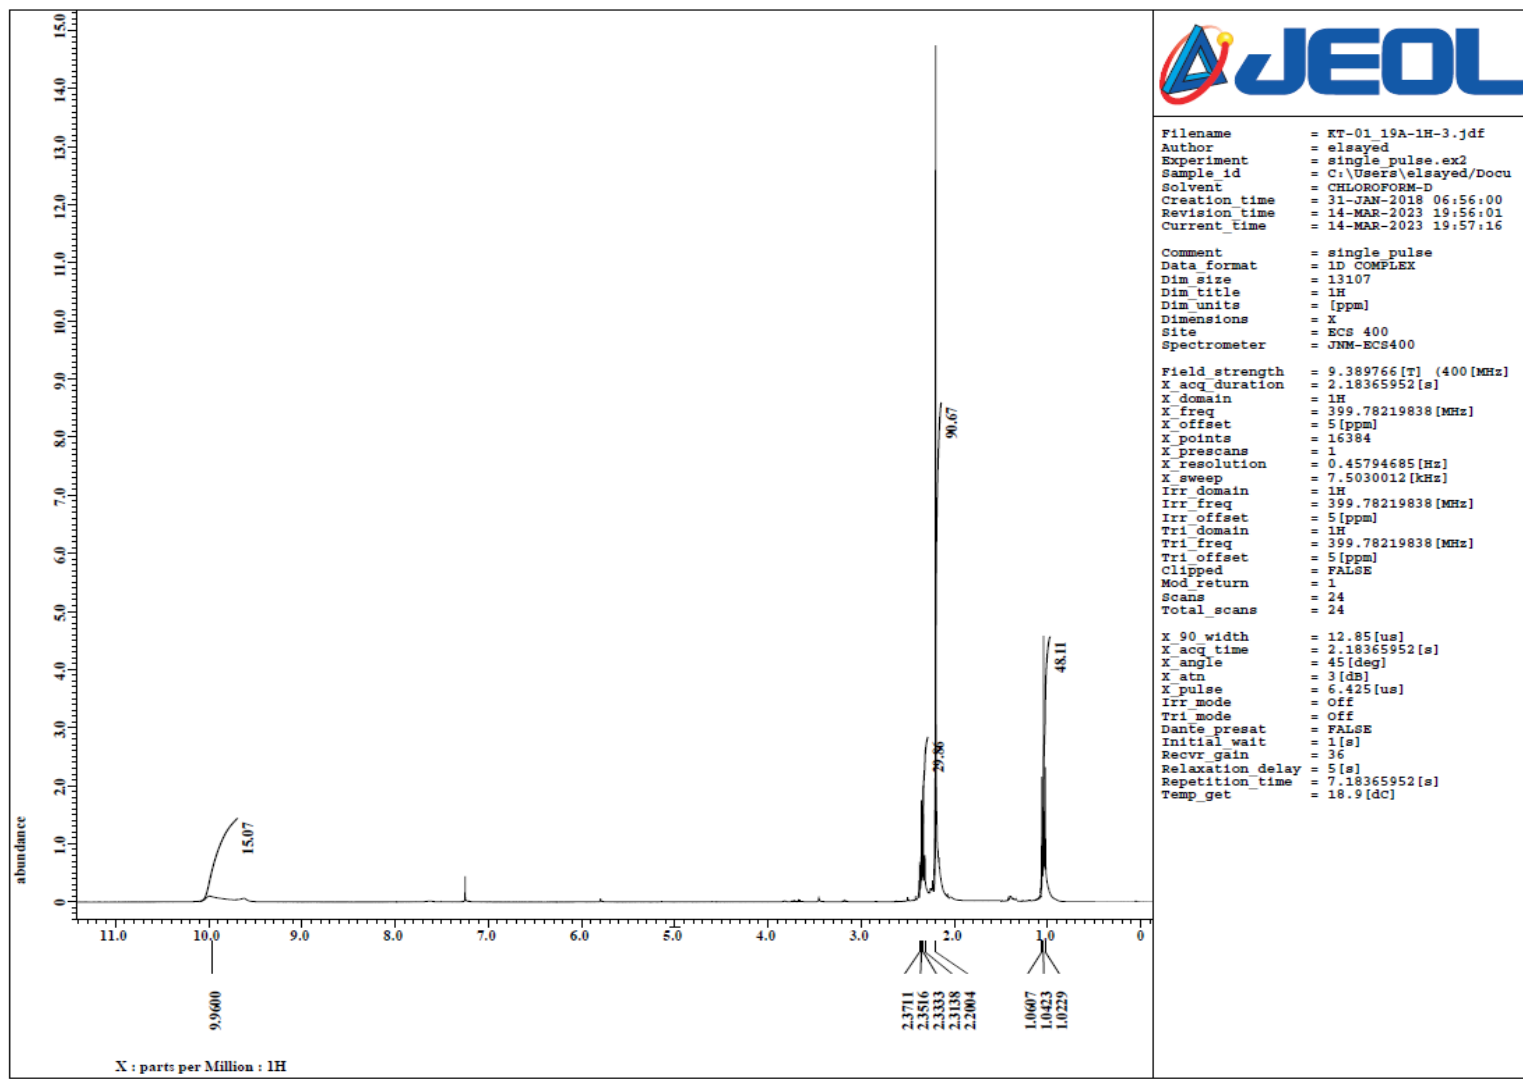

4-ethyl-3,5-dimethyl-1H-pyrazole (P1): <sup>13</sup>C-NMR (CDCl<sub>3</sub>)

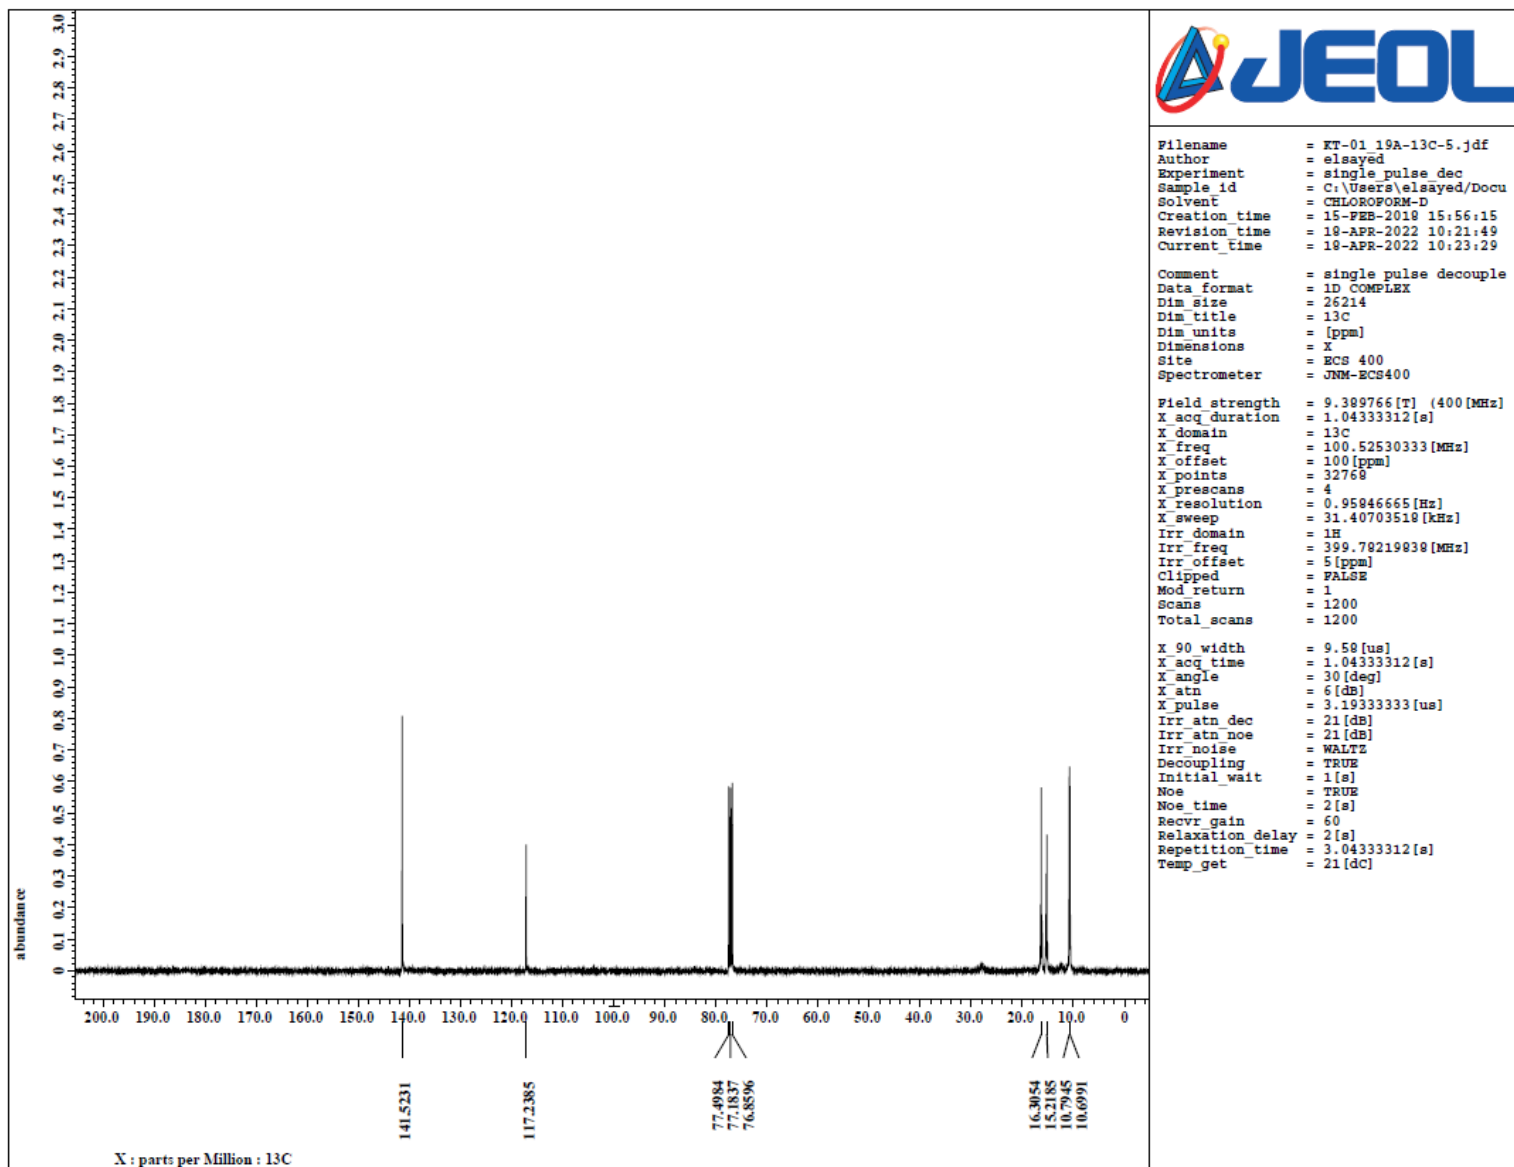

#### 4-ethyl-3,5-dimethyl-1H-pyrazole (P1): ESI-MS

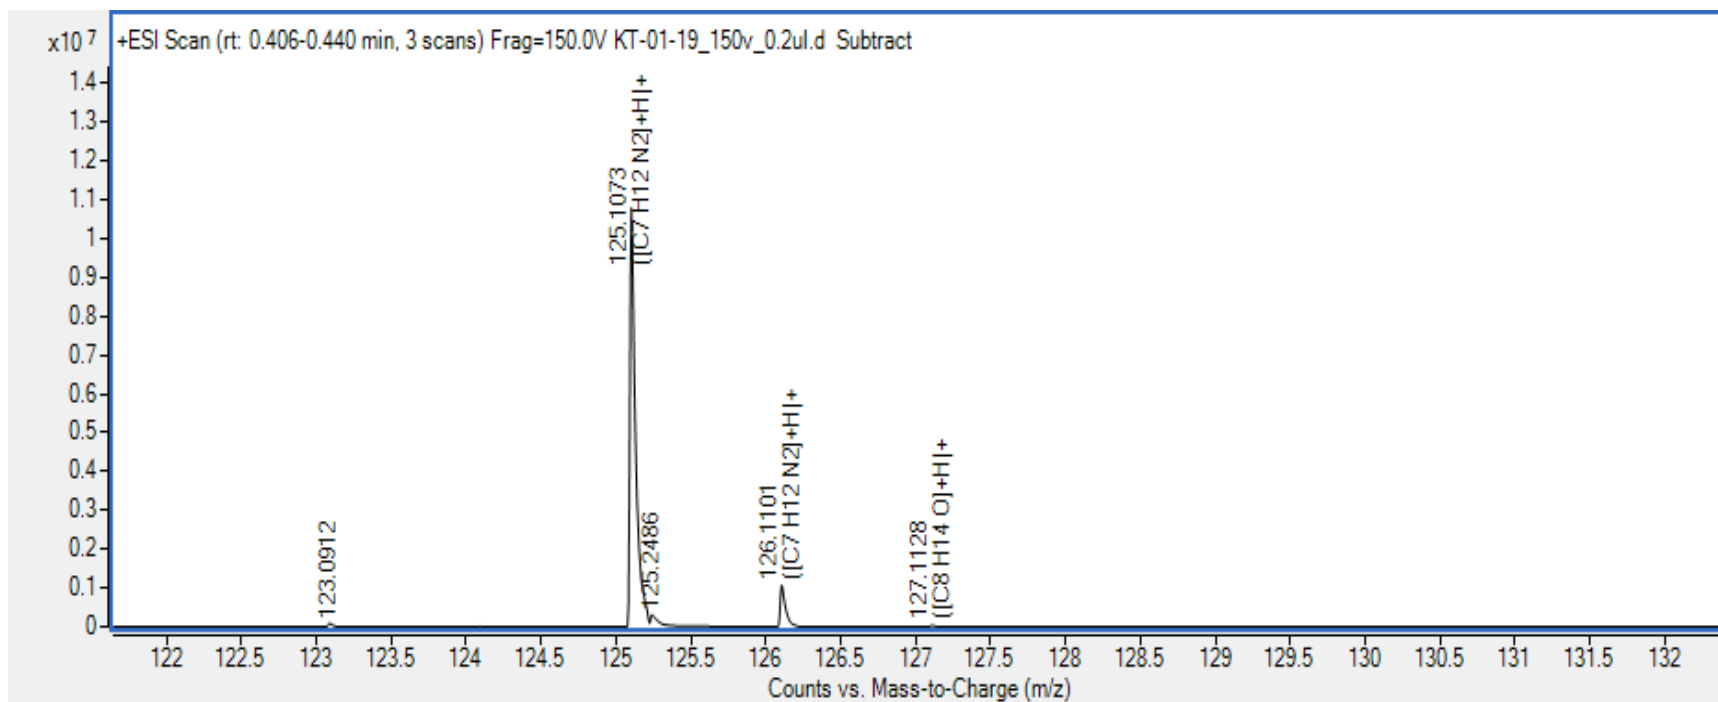

| Formula   | Species | m/z      | Score | Diff (abs. ppm) | Mass  |
|-----------|---------|----------|-------|-----------------|-------|
| C7 H12 N2 | (M+H)+  | 125.1073 | 87.02 | 0.29            | 124.1 |

3-methyl-1,4,5,6-tetrahydrocyclopenta[c]pyrazole (P2): <sup>1</sup>H-NMR (CDCl<sub>3</sub>)

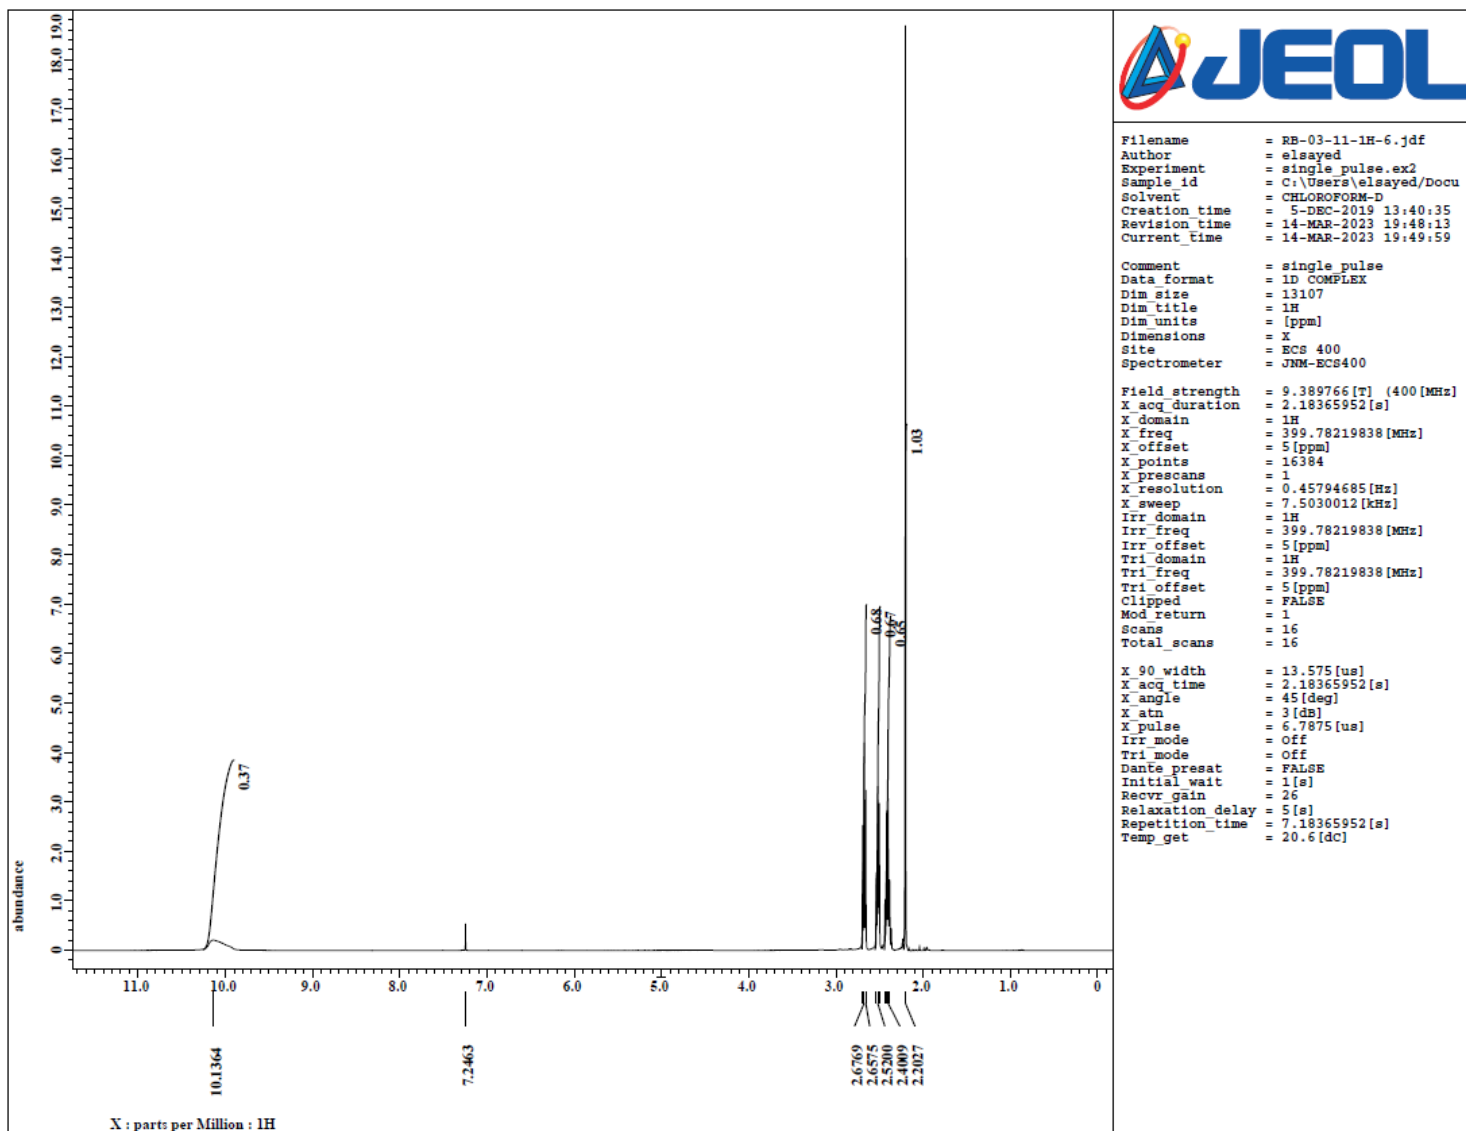

### 3-methyl-1,4,5,6-tetrahydrocyclopenta[c]pyrazole (P2): <sup>1</sup>H-NMR (CDCl<sub>3</sub>) \_ Expanded Aliphatic Region

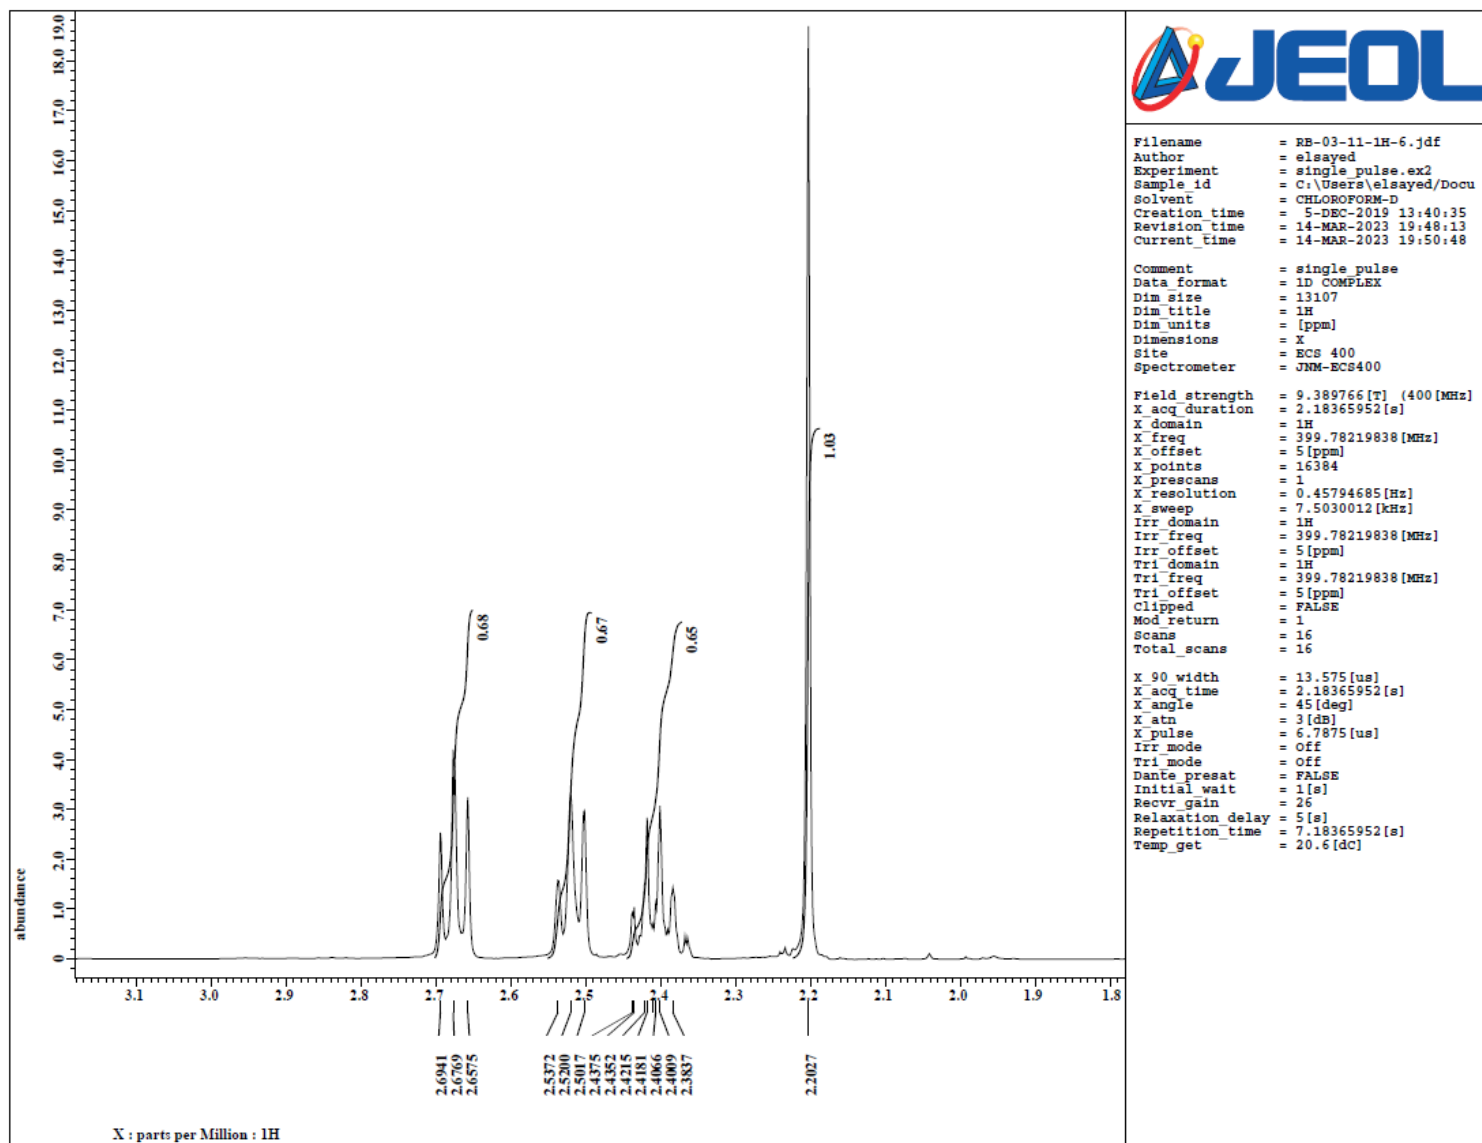

### 3-methyl-1,4,5,6-tetrahydrocyclopenta[c]pyrazole (P2): <sup>13</sup>C-NMR (CDCl<sub>3</sub>)

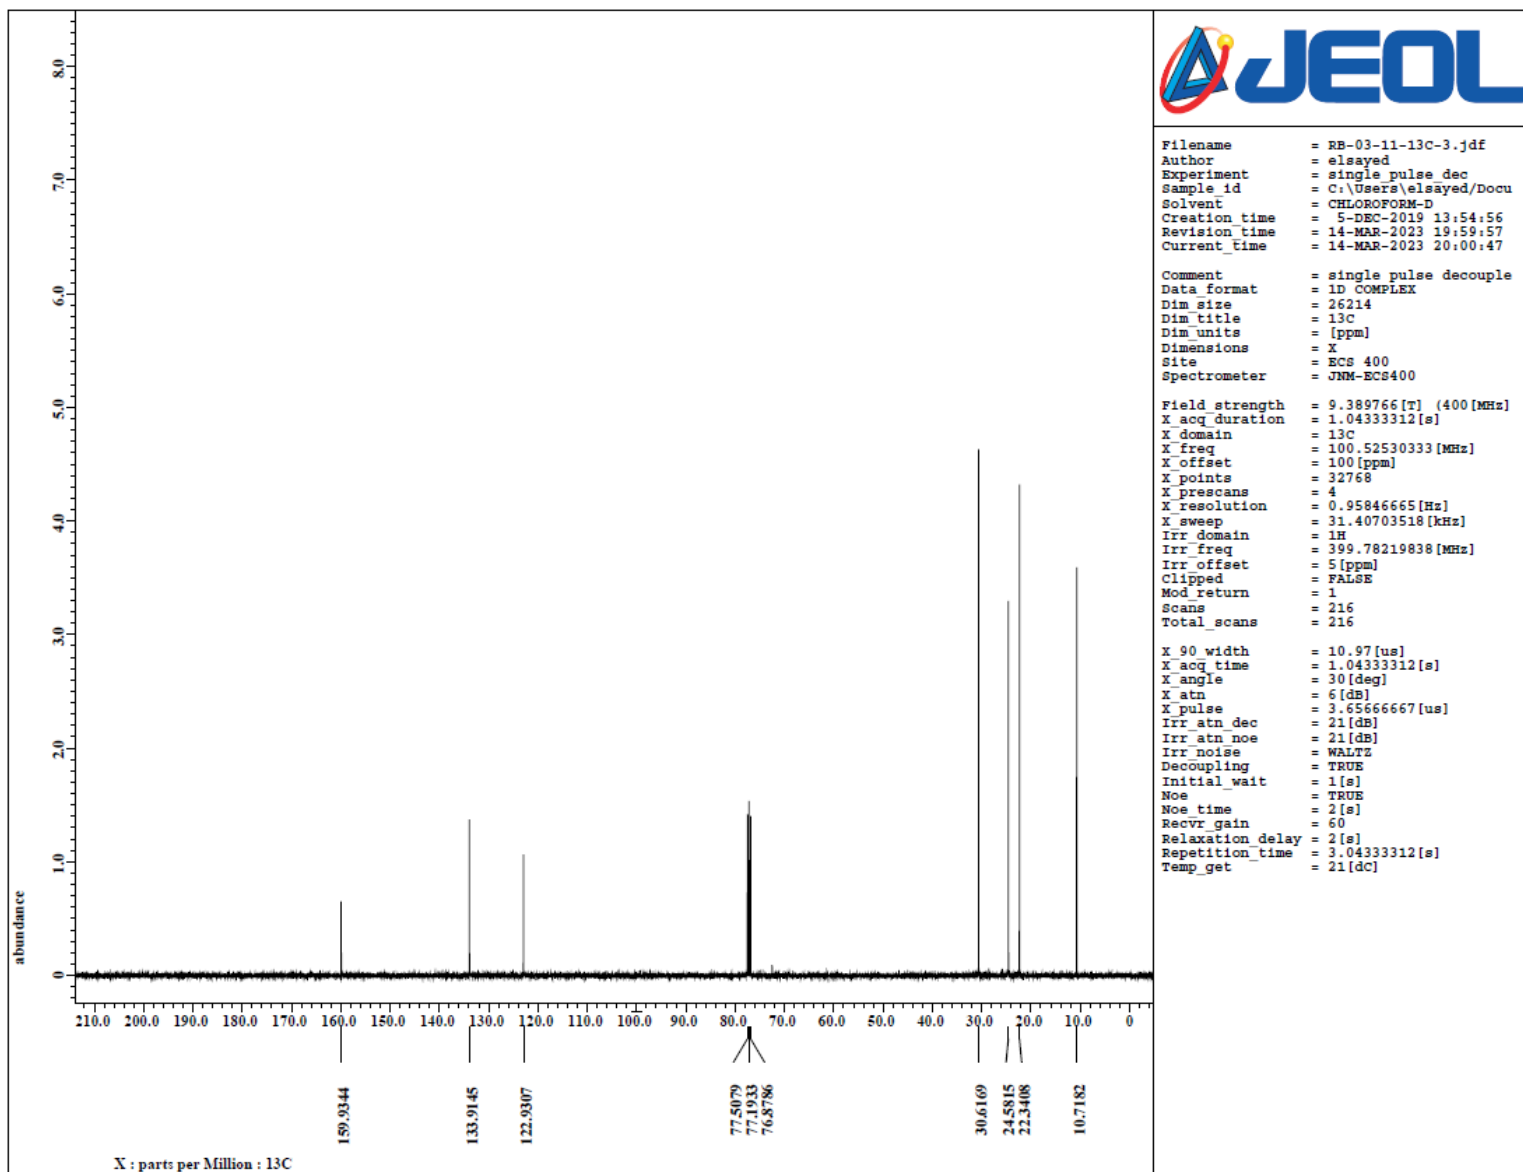



### 3-methyl-1,4,5,6-tetrahydrocyclopenta[c]pyrazole (P2): ESI-MS

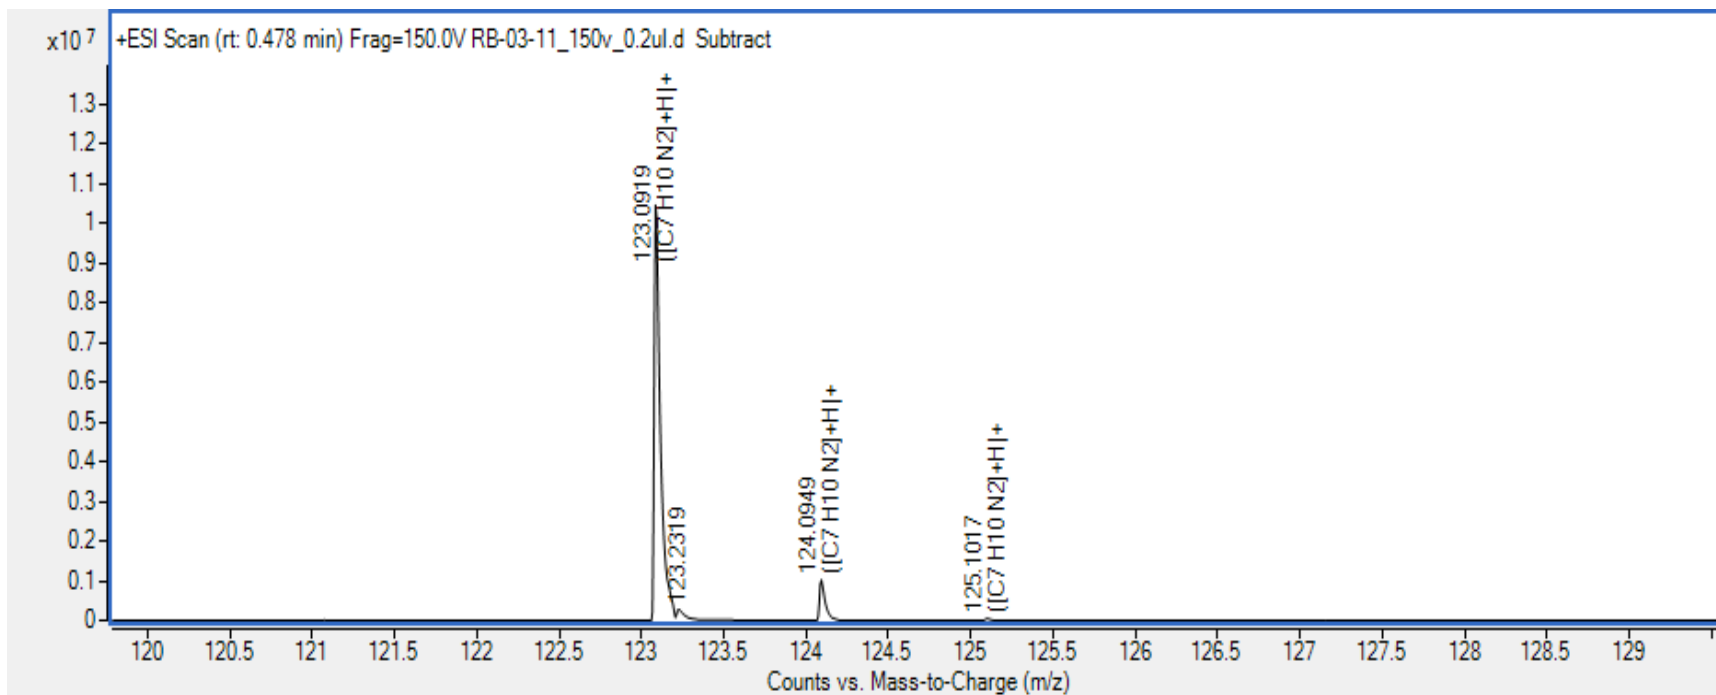

| Formula   | Species | m/z      | Score | Diff (abs. ppm) | Mass     |
|-----------|---------|----------|-------|-----------------|----------|
| C7 H10 N2 | (M+H)+  | 123.0919 | 99.11 | 1.85            | 122.0846 |

# 5-methyl-3-phenyl-1H-pyrazole (P3): <sup>1</sup>H-NMR (CDCl<sub>3</sub>)

<sup>1</sup>H NMR of P3

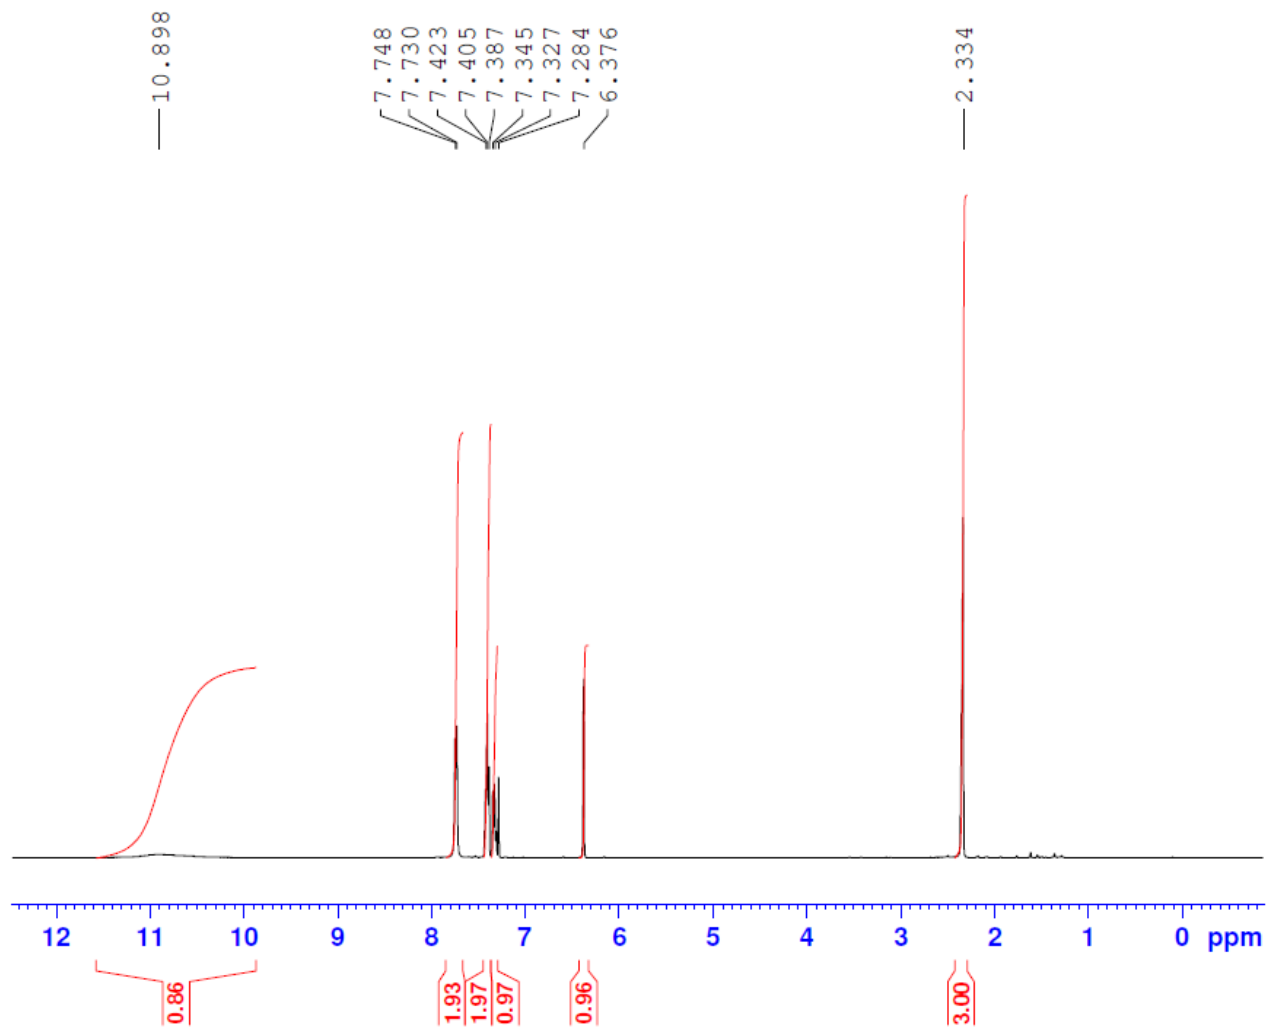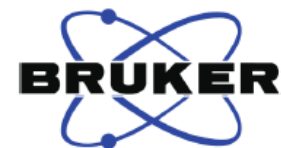

Current Data Parameters  
NAME SM-P3\_1H  
EXPNO 10  
PROCNO 1

F2 - Acquisition Parameters  
Date\_ 20230317  
Time 16.33 h  
INSTRUM Avance Neo  
PROBHD Z140678\_0053 ( )  
PULPROG zg30  
TD 65536  
SOLVENT CDCl3  
NS 16  
DS 2  
SWH 8196.722 Hz  
FIDRES 0.250144 Hz  
AQ 3.9976959 sec  
RG 101  
DW 61.000 usec  
DE 13.54 usec  
TE 296.3 K  
D1 1.00000000 sec  
TD0 1  
SFO1 400.1424709 MHz  
NUC1 1H  
P0 3.33 usec  
P1 10.00 usec  
PLW1 22.64200020 W

F2 - Processing parameters  
SI 65536  
SF 400.1400000 MHz  
WDW EM  
SSB 0  
LB 0.30 Hz  
GB 0  
PC 1.00

# 5-methyl-3-phenyl-1H-pyrazole (P3): <sup>1</sup>H-NMR (CDCl<sub>3</sub>) \_ Expanded Aromatic Region

<sup>1</sup>H NMR of P3

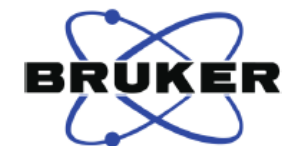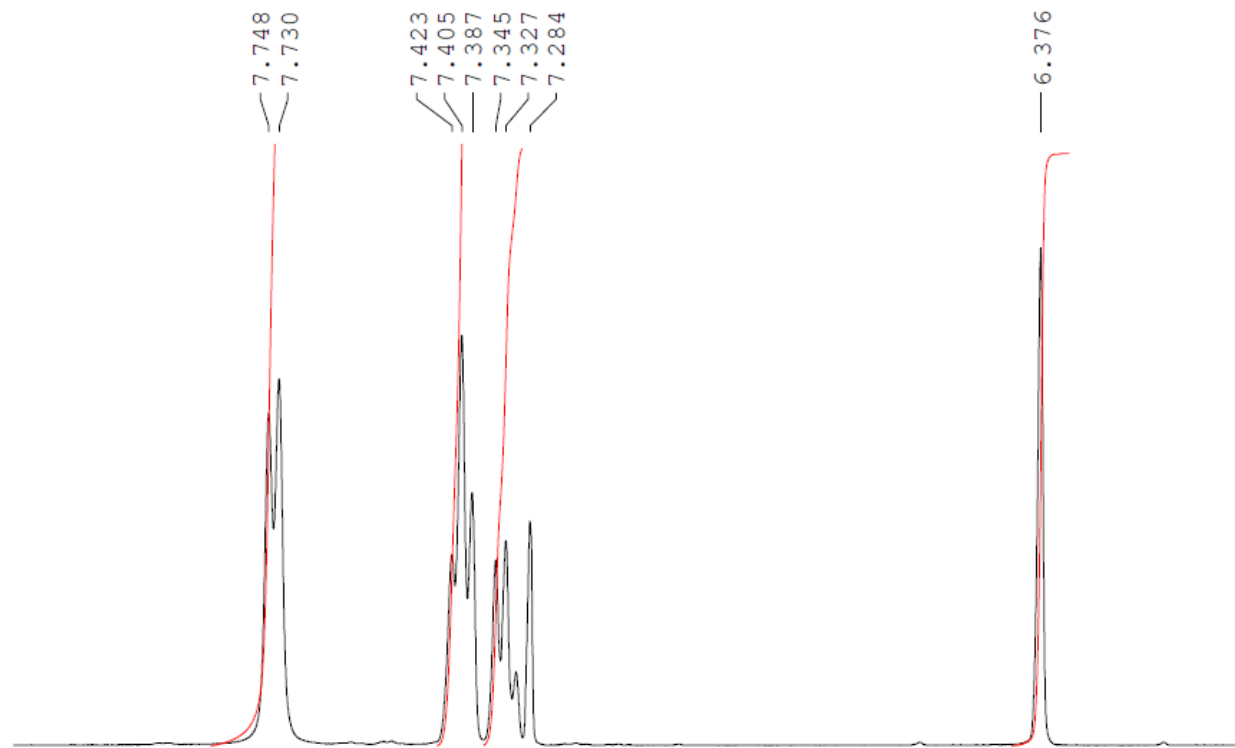

Current Data Parameters  
NAME SM-P3\_1H  
EXPNO 10  
PROCNO 1

F2 - Acquisition Parameters  
Date\_ 20230317  
Time 16.33 h  
INSTRUM Avance Neo  
PROBHD Z140678\_0053 (  
PULPROG zg30  
TD 65536  
SOLVENT CDCl3  
NS 16  
DS 2  
SWH 8196.722 Hz  
FIDRES 0.250144 Hz  
AQ 3.9976959 sec  
RG 101  
DW 61.000 usec  
DE 13.54 usec  
TE 296.3 K  
D1 1.00000000 sec  
TD0 1  
SFO1 400.1424709 MHz  
NUC1 1H  
PO 3.33 usec  
P1 10.00 usec  
PLW1 22.64200020 W

F2 - Processing parameters  
SI 65536  
SF 400.1400000 MHz  
WDW EM  
SSB 0  
LB 0.30 Hz  
GB 0  
PC 1.00

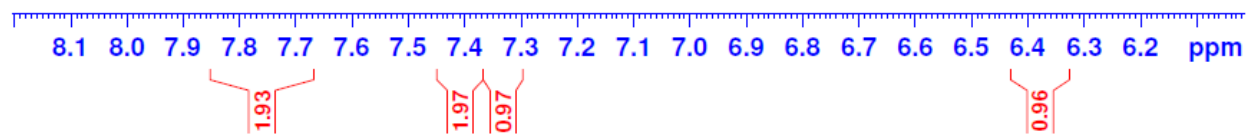

5-methyl-3-phenyl-1H-pyrazole (P3): <sup>13</sup>C-NMR (CDCl<sub>3</sub>)

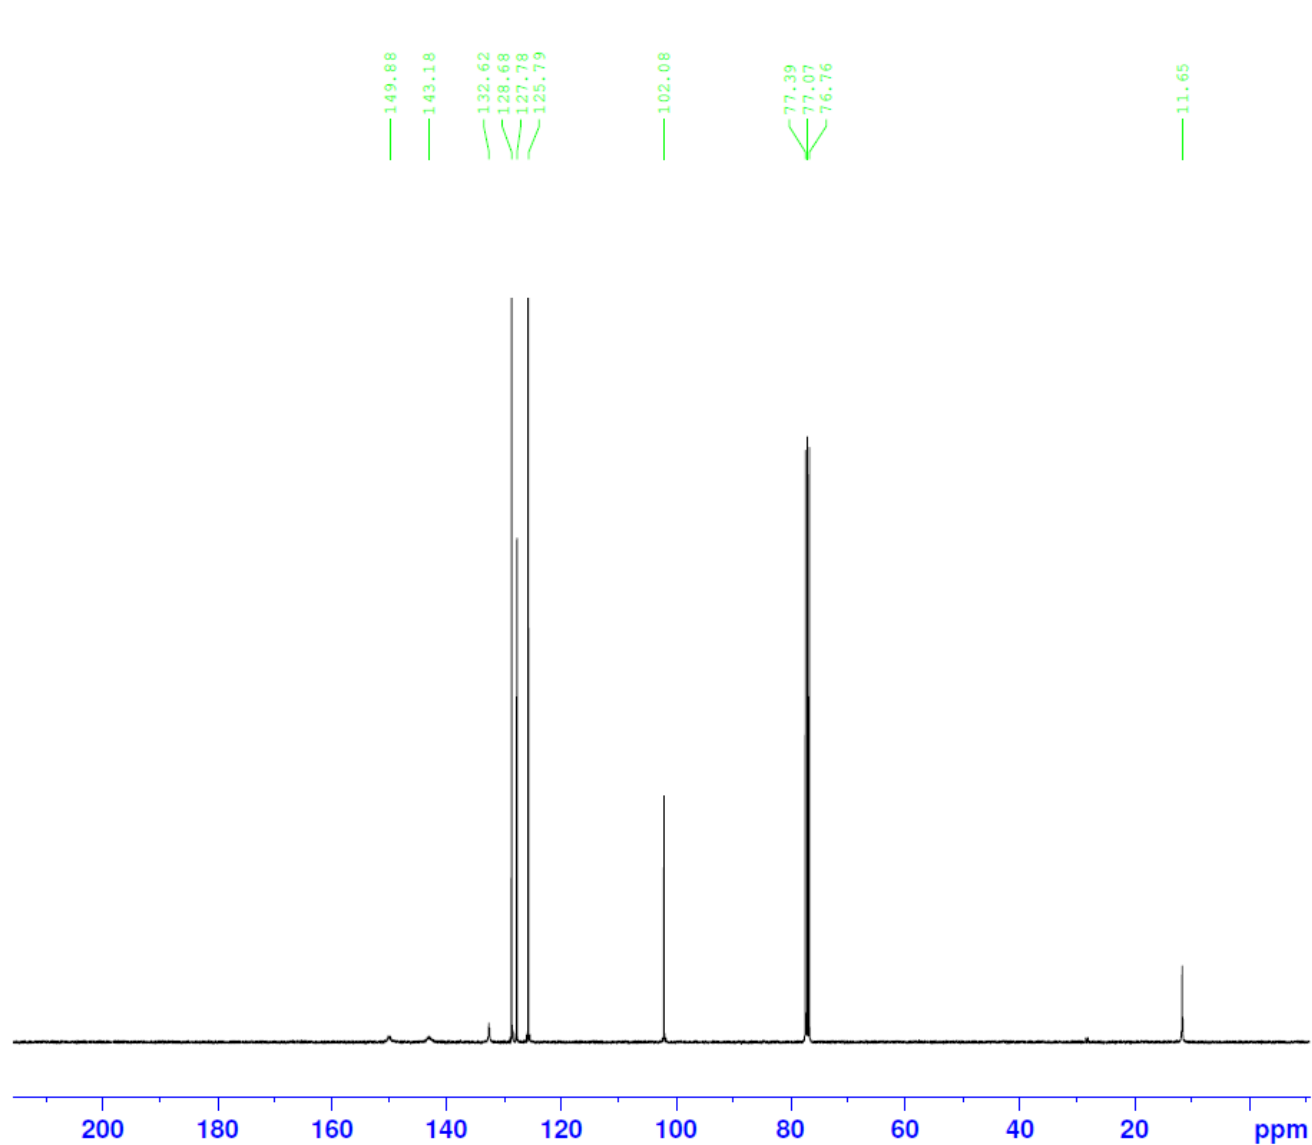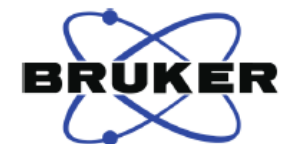

Current Data Parameters  
NAME SM-P3\_1Hand13C  
EXPNO 11  
PROCNO 1

F2 - Acquisition Parameters  
Date\_ 20230318  
Time 9.25 h  
INSTRUM Avance Neo  
PROBHD z140678\_0053 (   
PULPROG zgpg30  
TD 65536  
SOLVENT CDCl3  
NS 4096  
DS 4  
SWH 23809.523 Hz  
FIDRES 0.726609 Hz  
AQ 1.3762560 sec  
RG 16  
DW 21.000 usec  
DE 6.50 usec  
TE 296.2 K  
D1 2.0000000 sec  
D11 0.03000000 sec  
TD0 1  
SFO1 100.6253446 MHz  
NUC1 13C  
P0 3.33 usec  
P1 10.00 usec  
PLW1 77.80000305 W  
SFO2 400.1416006 MHz  
NUC2 1H  
CPDPRG[2] waltz65  
PCPD2 90.00 usec  
PLW2 22.64200020 W  
PLW12 0.27952999 W  
PLW13 0.14060000 W

F2 - Processing parameters  
SI 32768  
SF 100.6152830 MHz  
WDW EM  
SSB 0  
LB 1.00 Hz  
GB 0  
PC 1.40

### 5-methyl-3-phenyl-1H-pyrazole (P3): ESI-MS

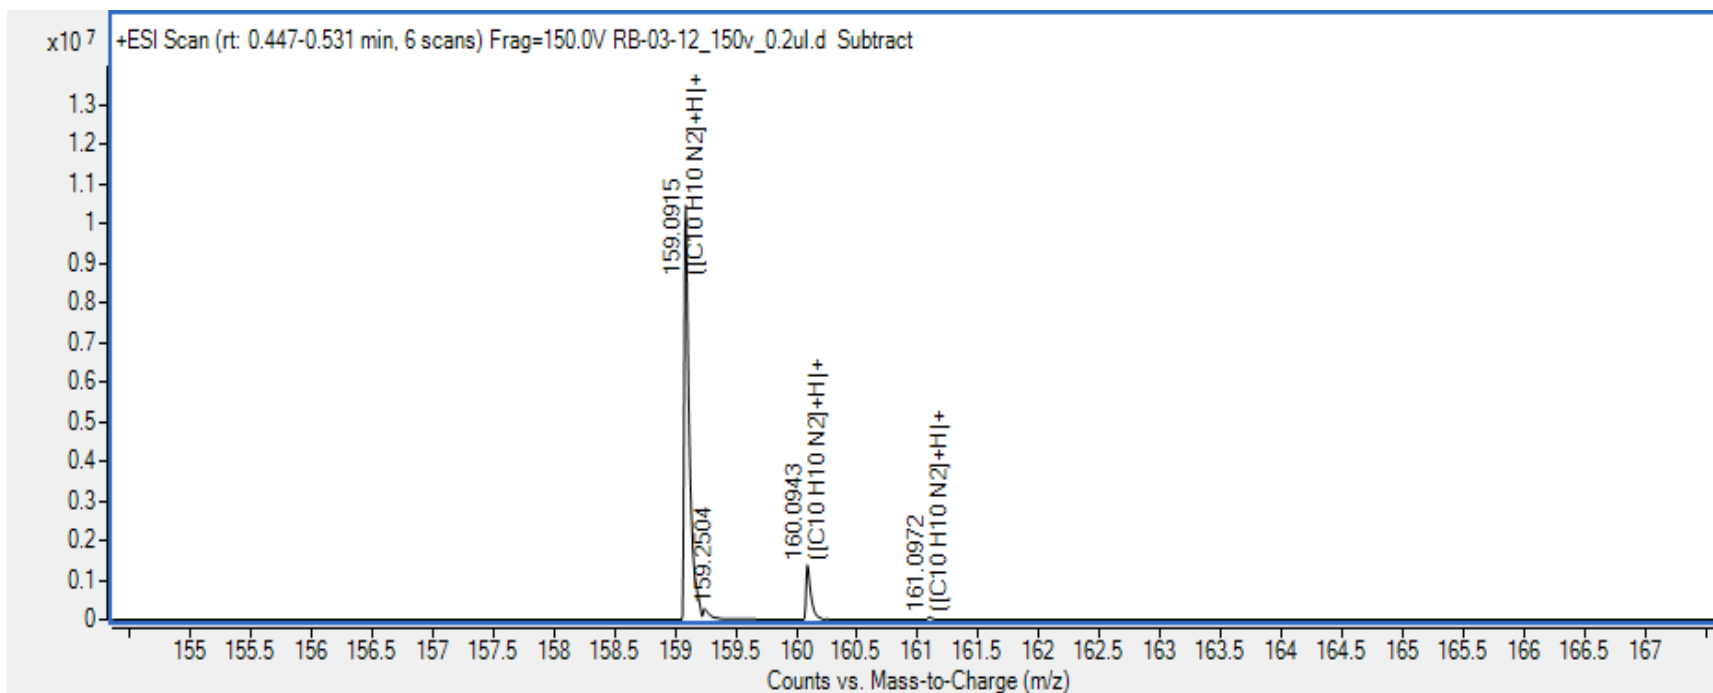

| Formula    | Species            | m/z      | Score | Diff (abs. ppm) | Mass     |
|------------|--------------------|----------|-------|-----------------|----------|
| C10 H10 N2 | (M+H) <sup>+</sup> | 159.0915 | 98.7  | 1.37            | 158.0842 |

4-chloro-5-methyl-3-phenyl-1H-pyrazole (P4): <sup>1</sup>H-NMR (CDCl<sub>3</sub>)

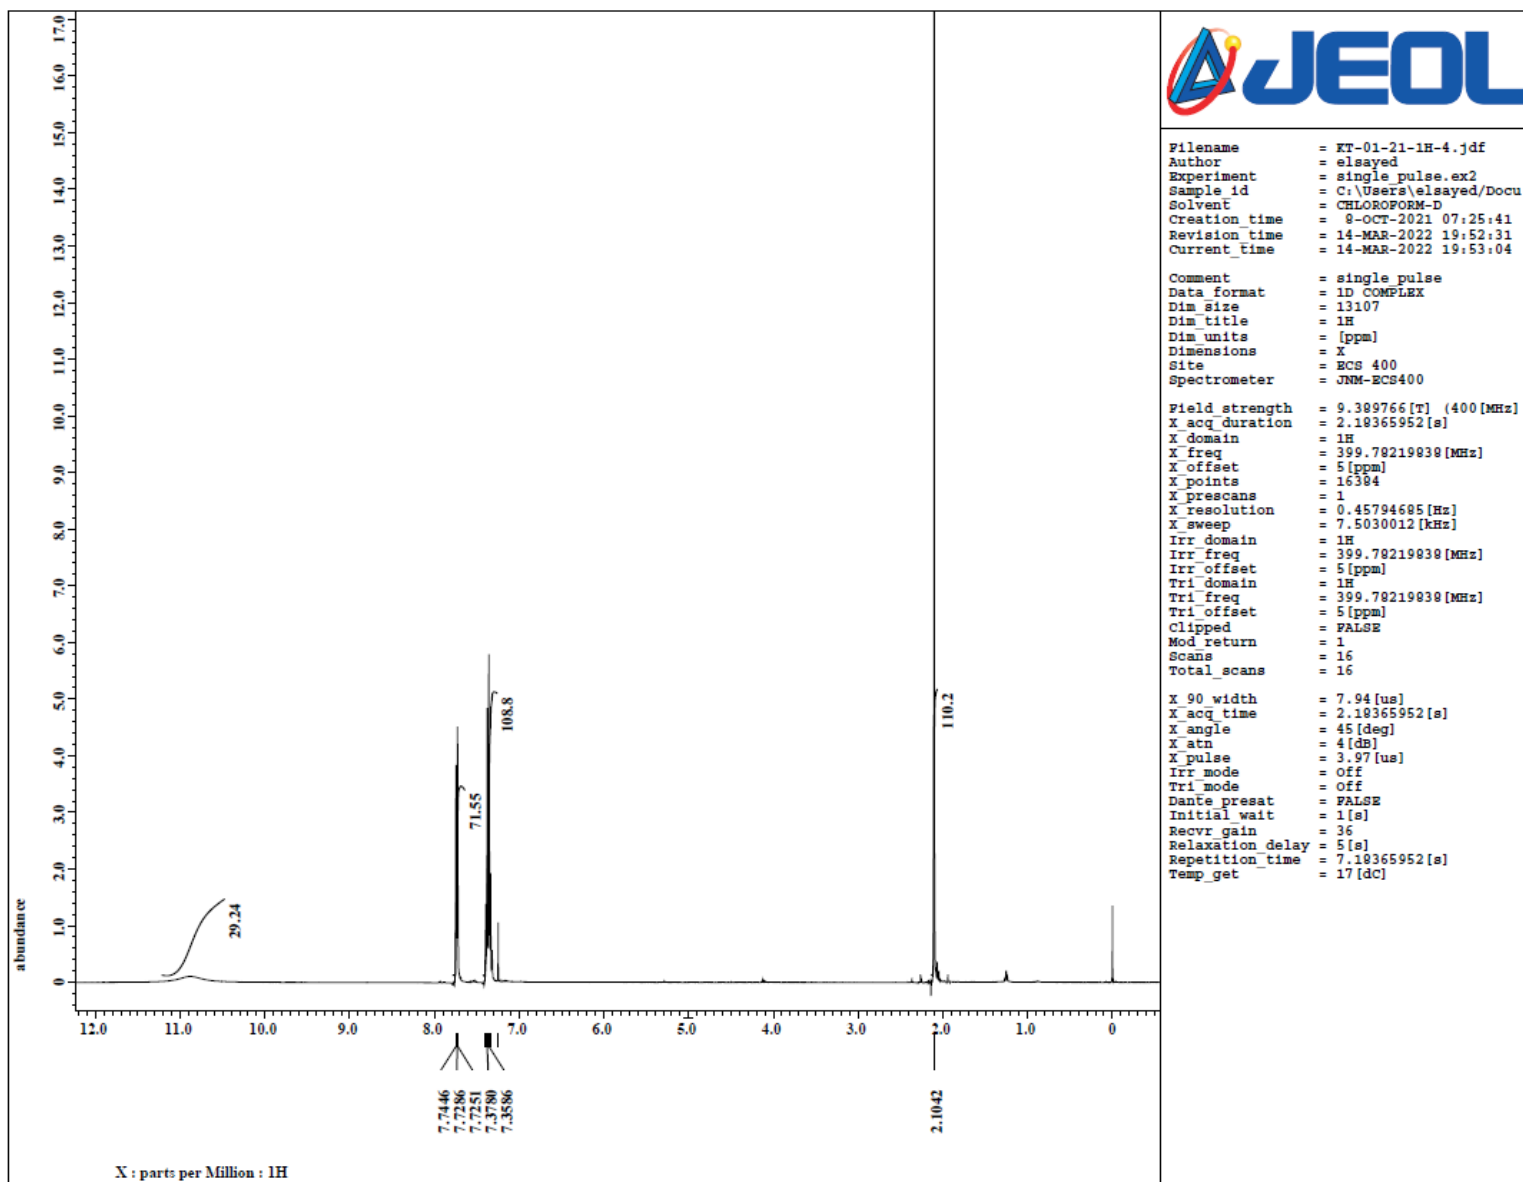

### 4-chloro-5-methyl-3-phenyl-1H-pyrazole (P4): <sup>1</sup>H-NMR (CDCl<sub>3</sub>) \_ Expanded Aromatic Region

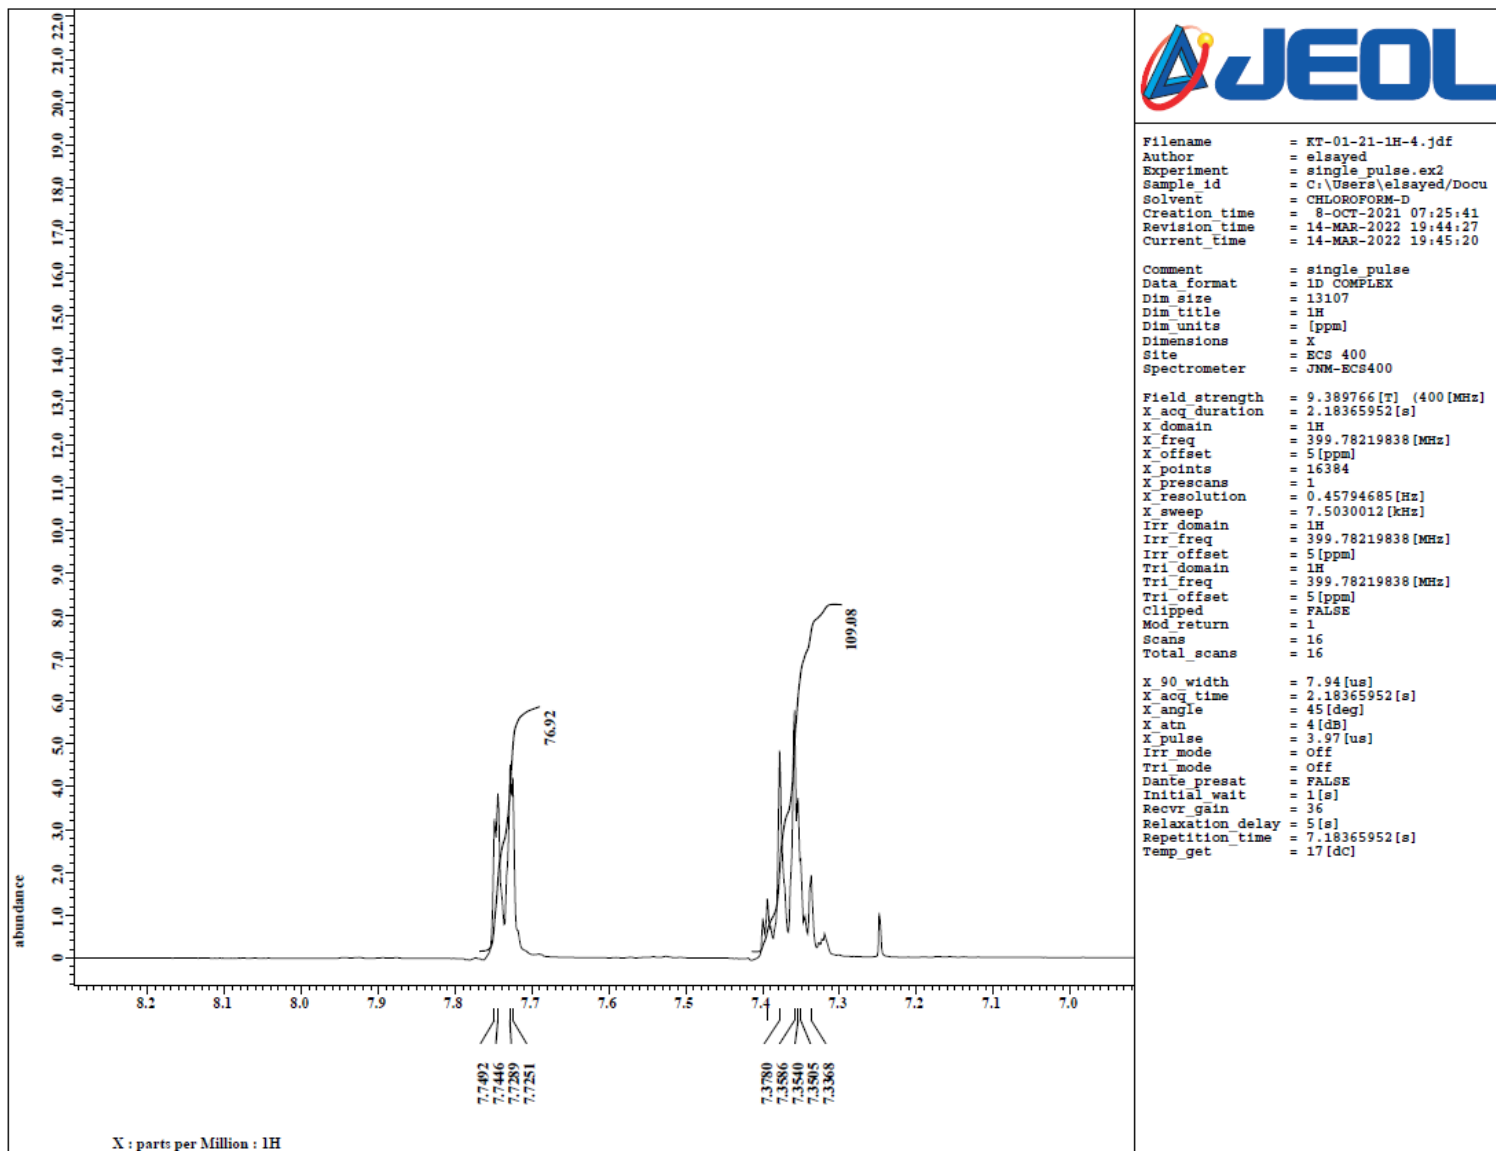

4-chloro-5-methyl-3-phenyl-1H-pyrazole (P4): <sup>13</sup>C-NMR (CDCl<sub>3</sub>)

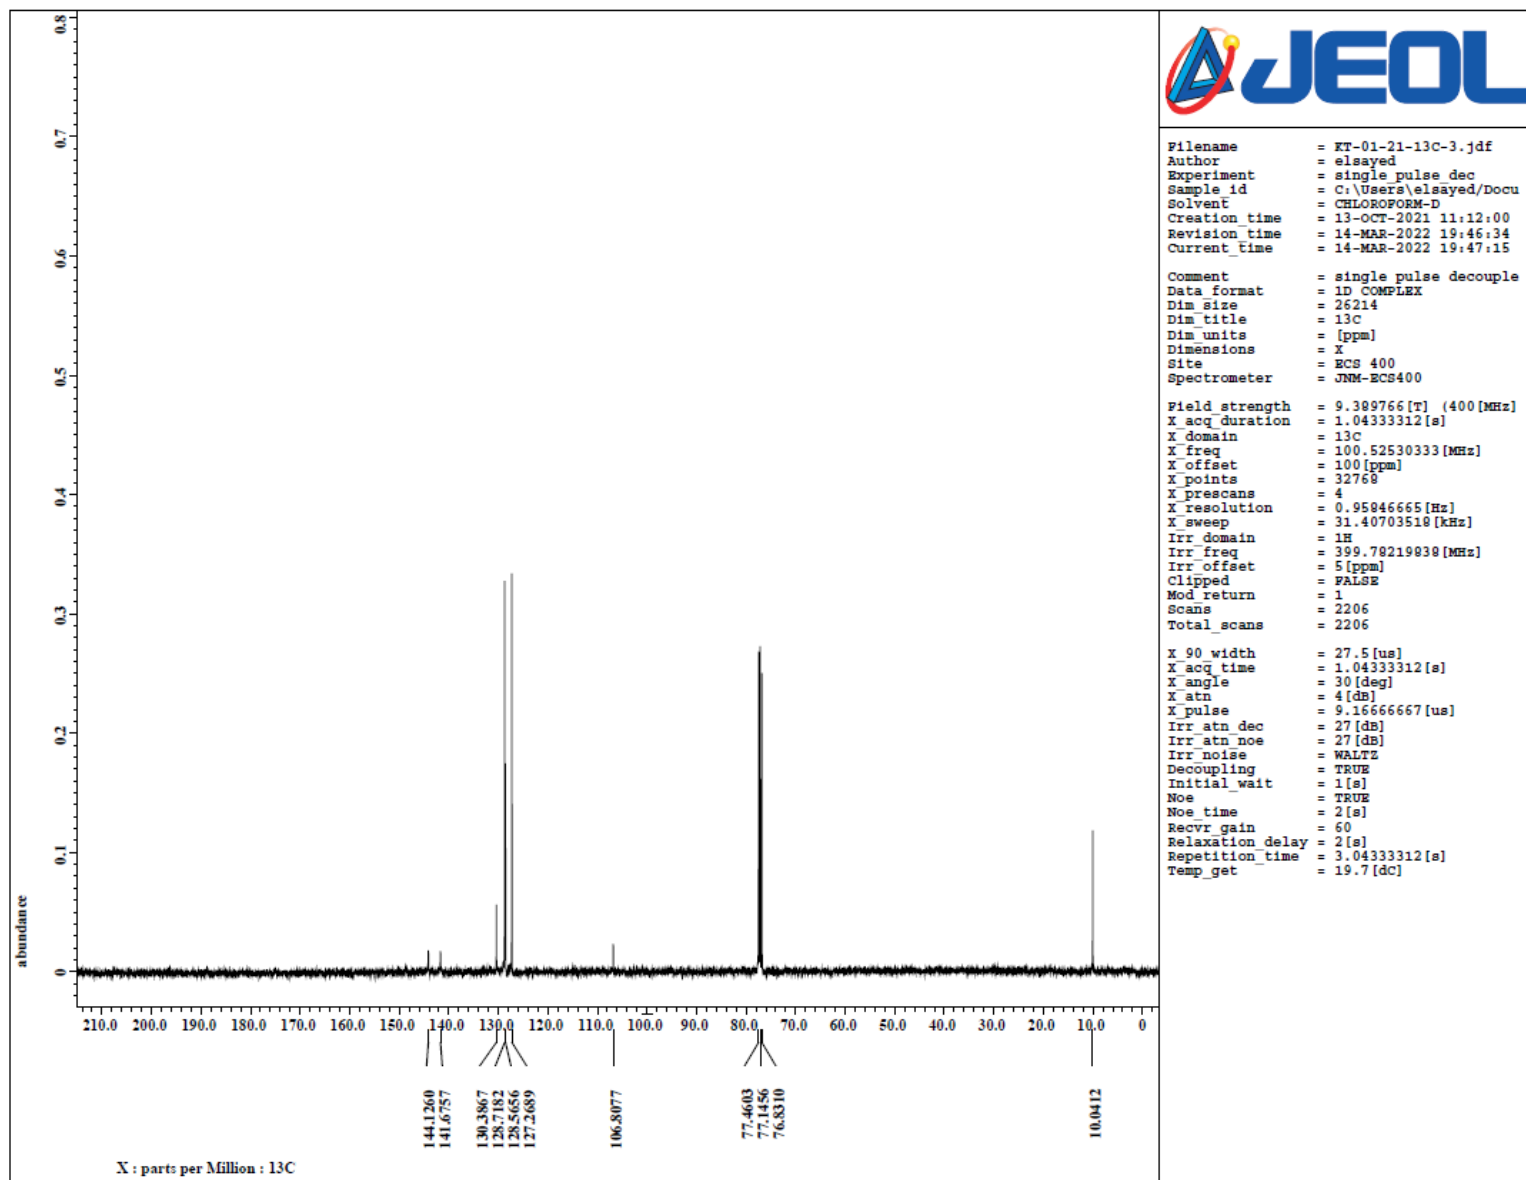



### 4-chloro-5-methyl-3-phenyl-1H-pyrazole (P4): ESI-MS

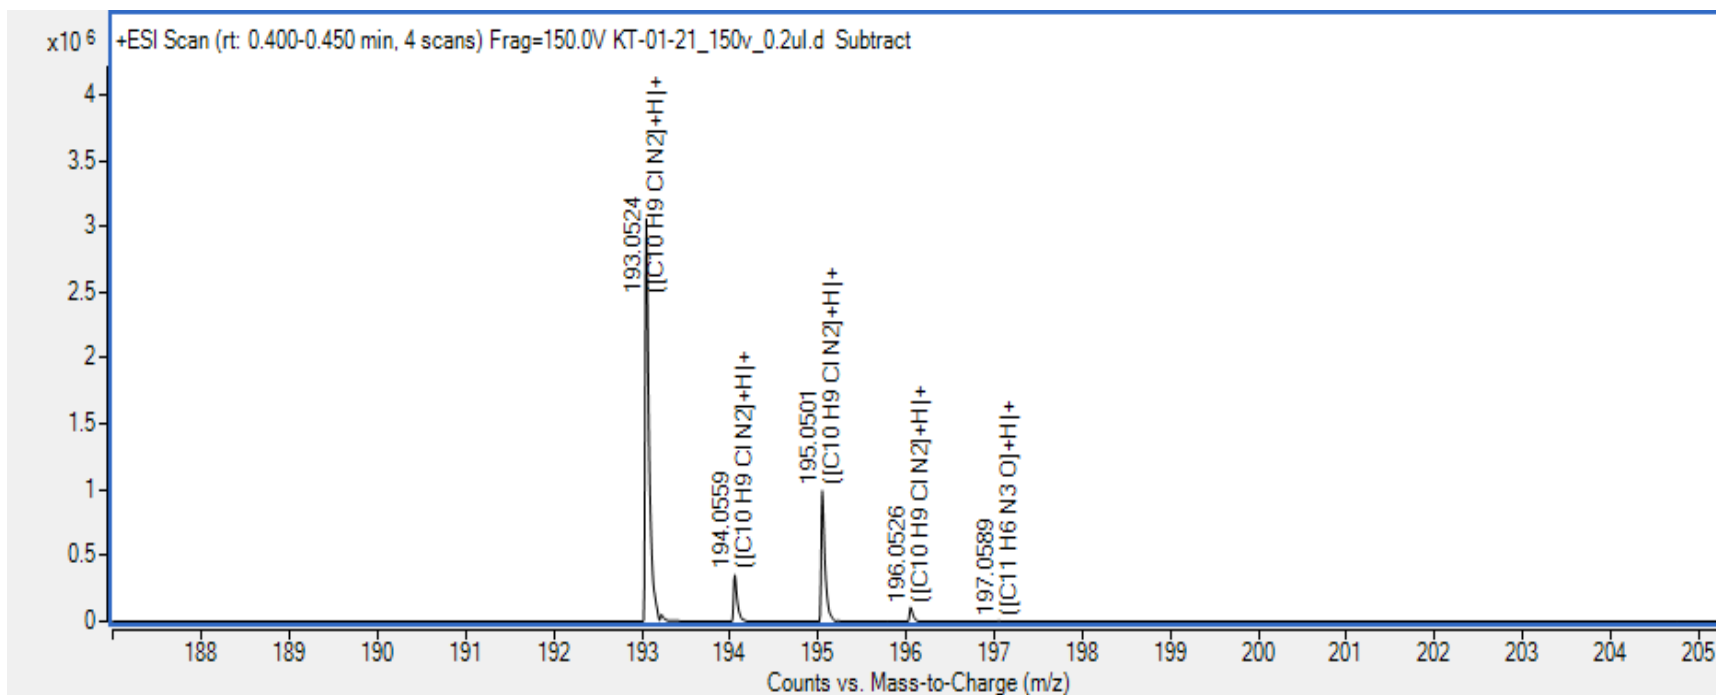

| Formula                                         | Species            | m/z      | Score | Diff (abs. ppm) | Mass     |
|-------------------------------------------------|--------------------|----------|-------|-----------------|----------|
| C <sub>10</sub> H <sub>9</sub> ClN <sub>2</sub> | (M+H) <sup>+</sup> | 193.0524 | 99.25 | 0.82            | 192.0453 |

3-methyl-4,5-dihydro-2H-benzo[g]indazole (P5): <sup>1</sup>H-NMR (CDCl<sub>3</sub>)

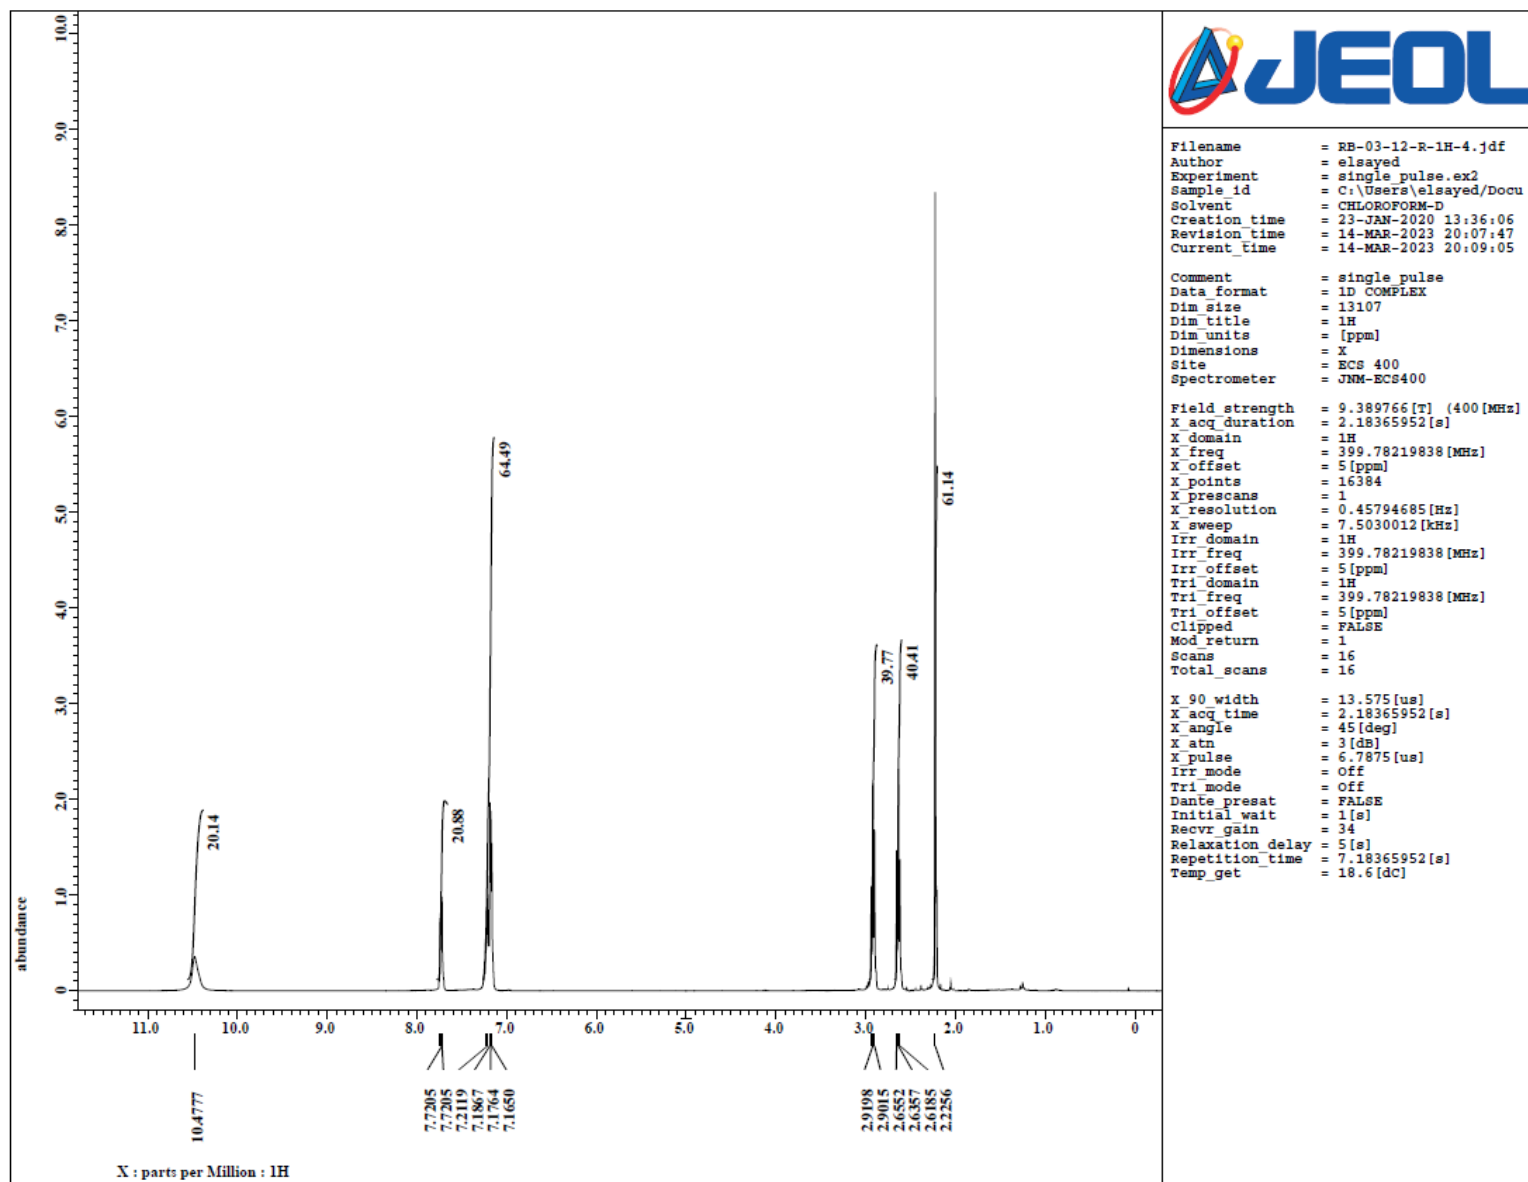

### 3-methyl-4,5-dihydro-2H-benzo[g]indazole (P5): <sup>1</sup>H-NMR (CDCl<sub>3</sub>) \_ Expanded Aromatic Region

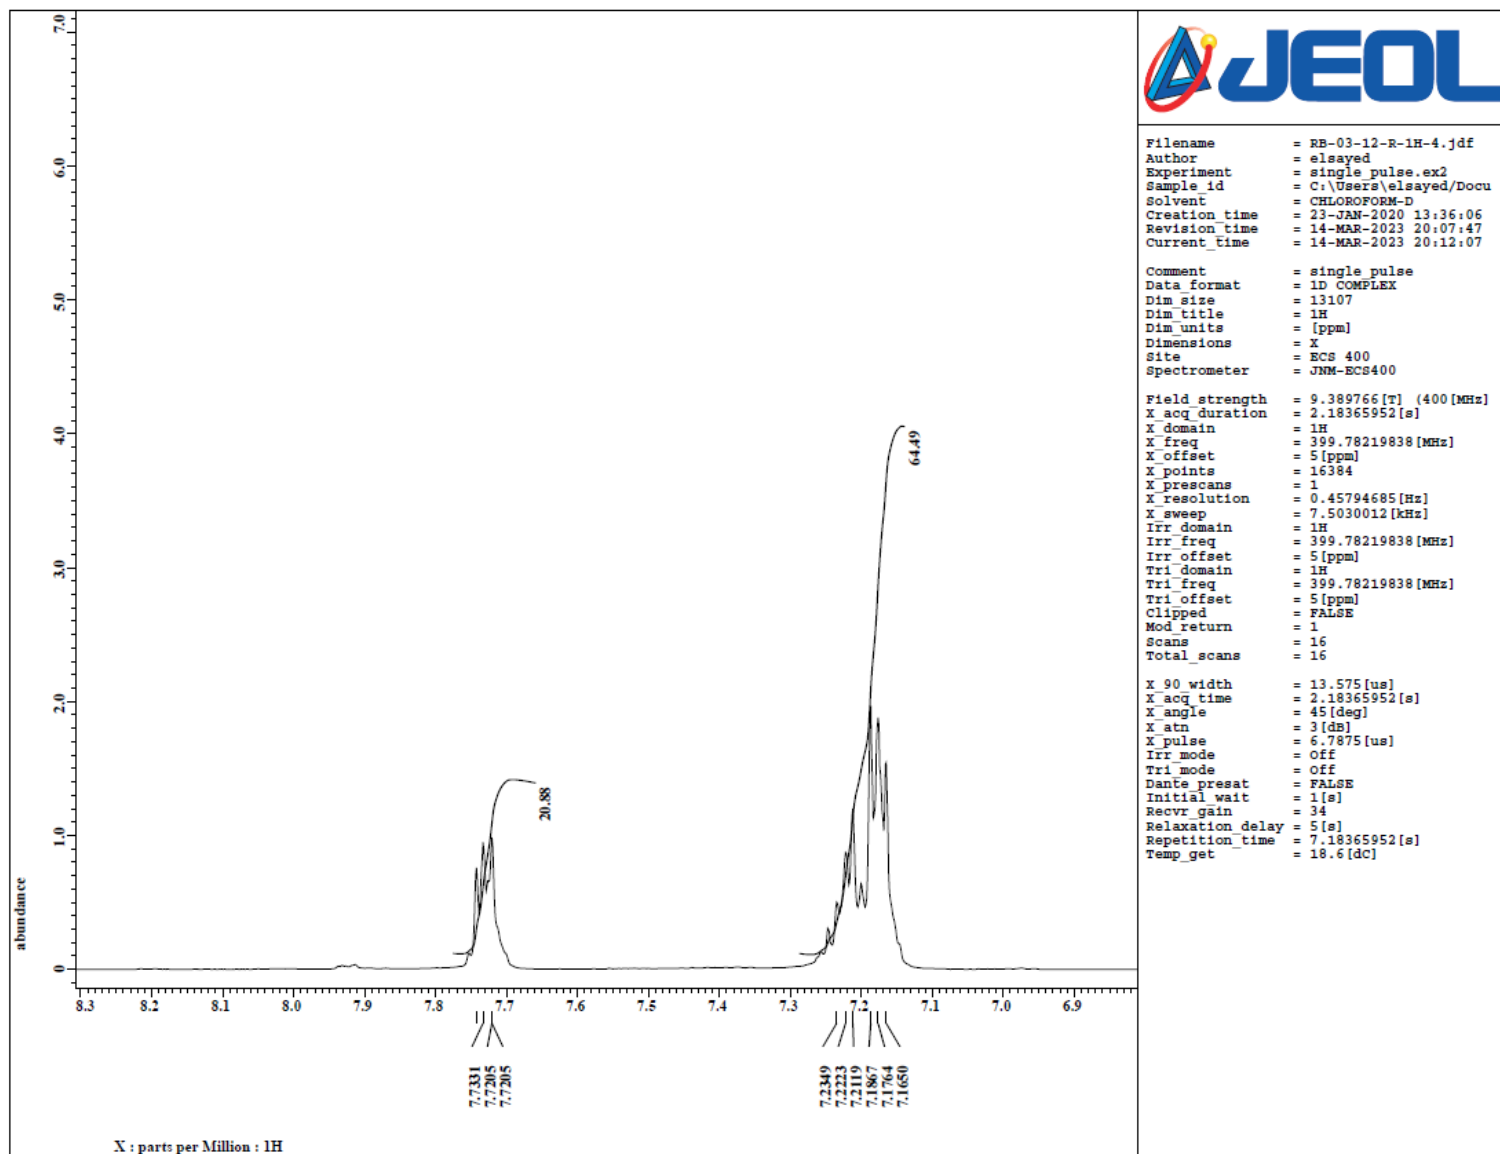

### 3-methyl-4,5-dihydro-2H-benzo[g]indazole (P5): <sup>1</sup>H-NMR (CDCl<sub>3</sub>) \_ Expanded Aliphatic Region

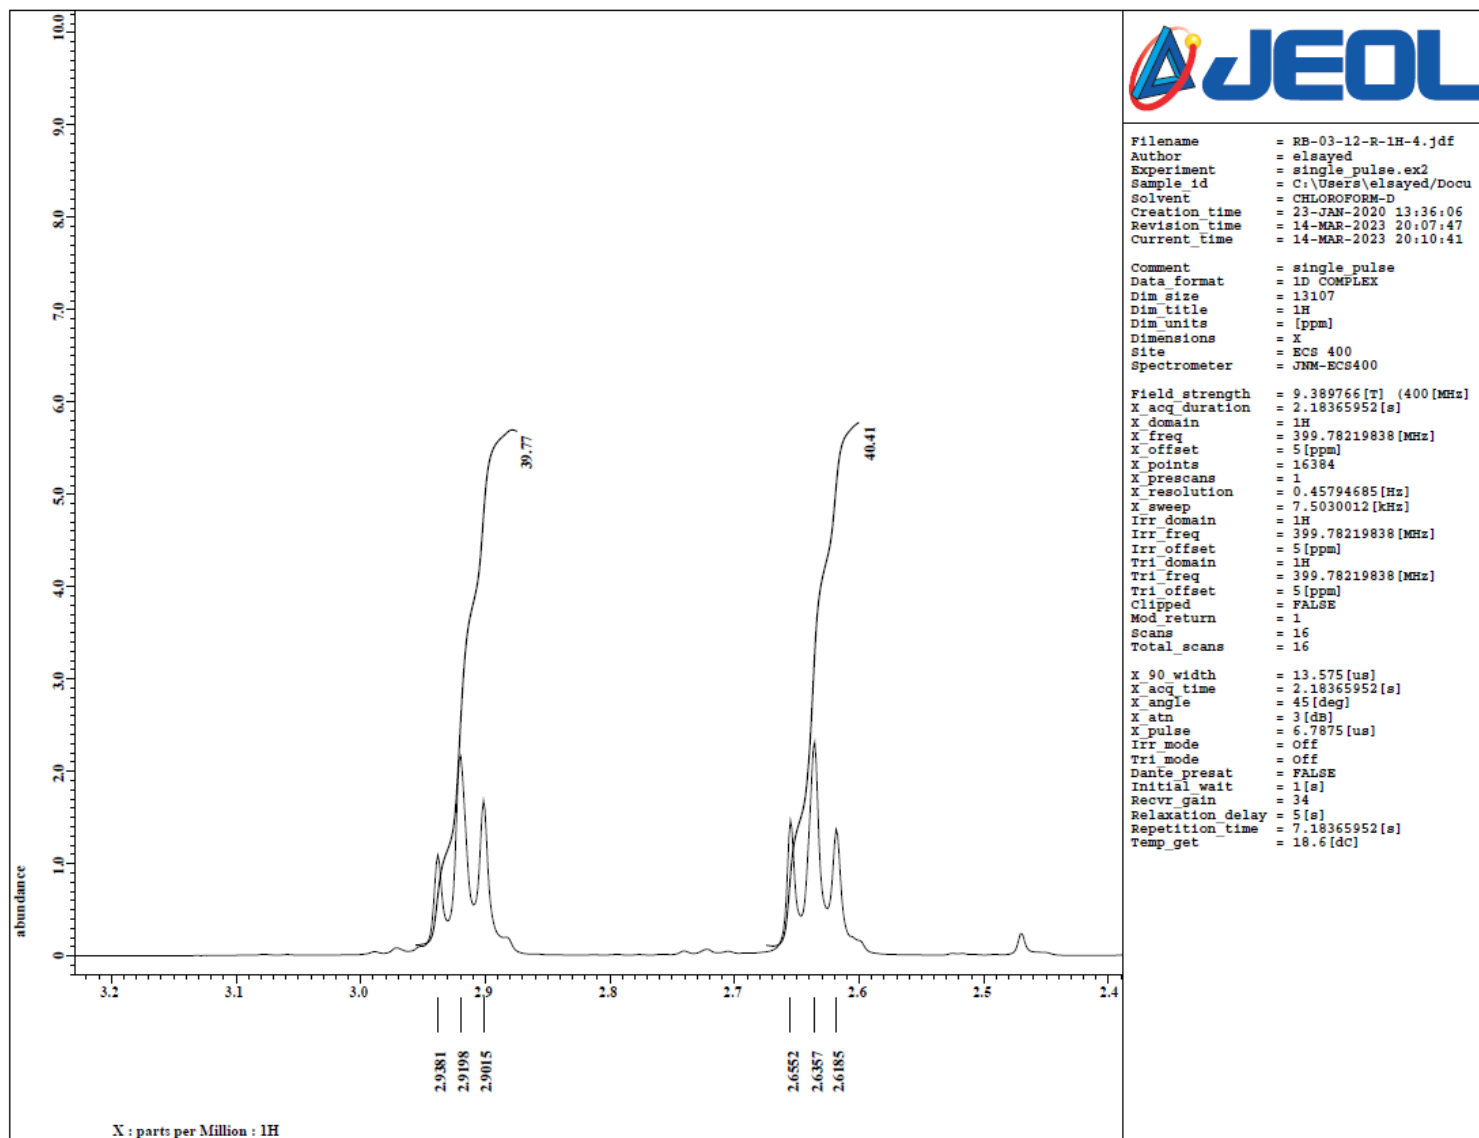

3-methyl-4,5-dihydro-2H-benzo[g]indazole (P5): <sup>13</sup>C-NMR (CDCl<sub>3</sub>)

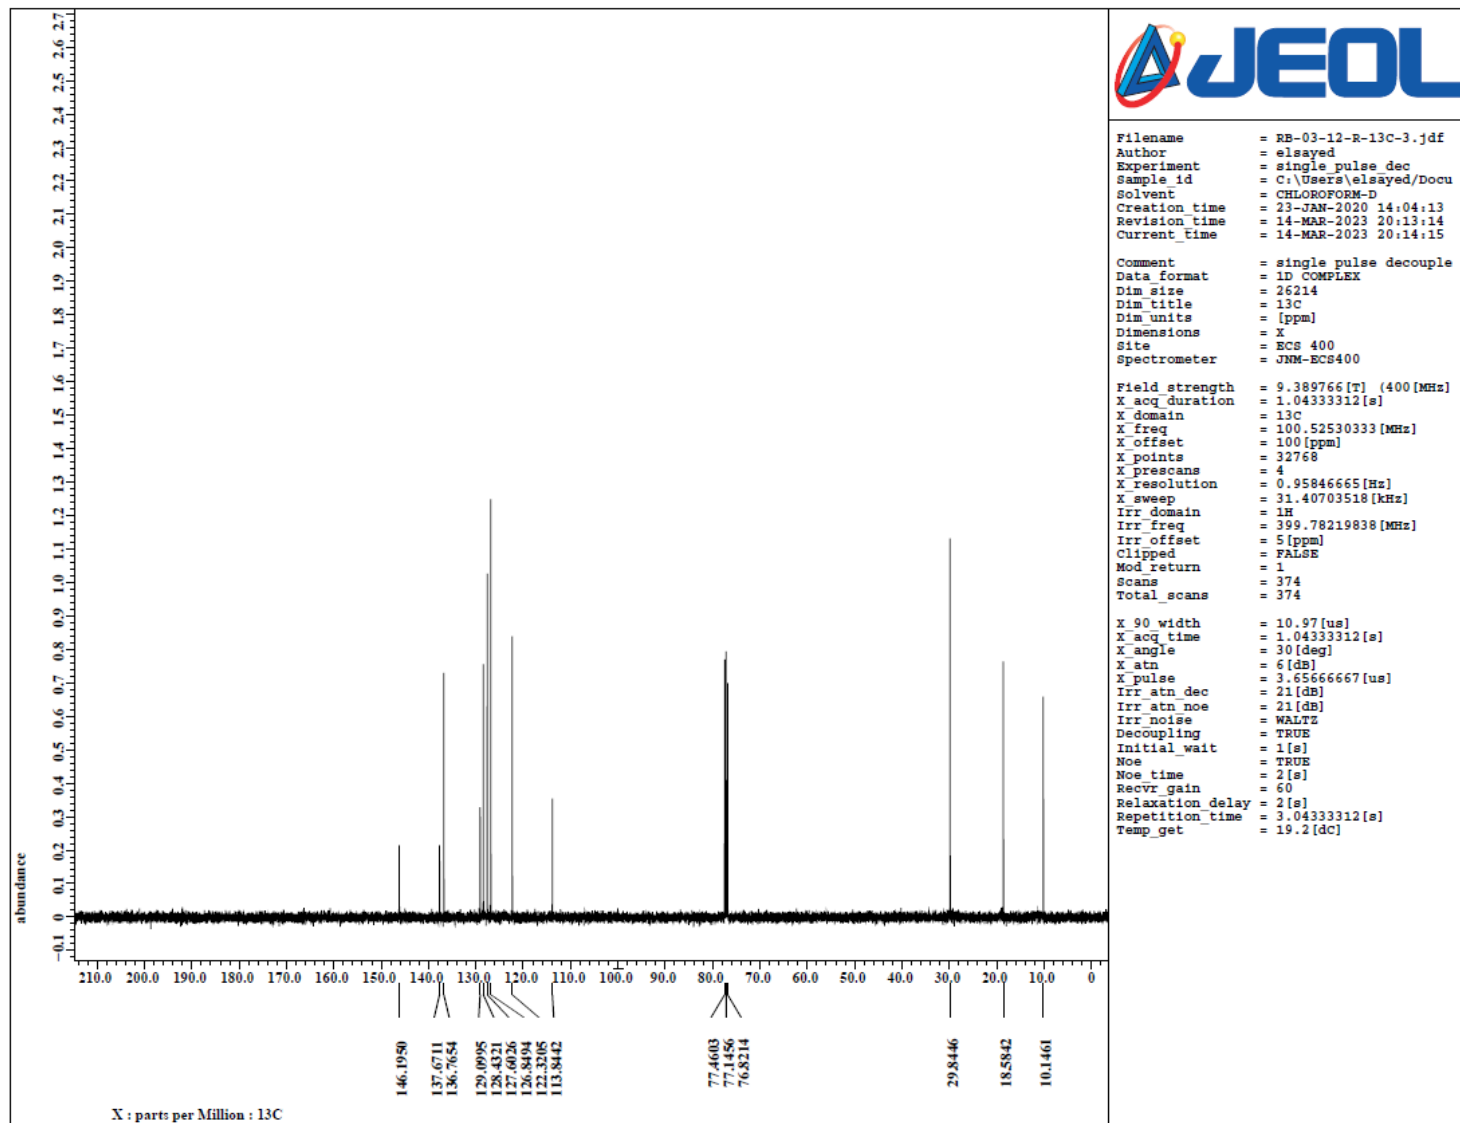

### 3-methyl-4,5-dihydro-2H-benzo[g]indazole (P5): ESI-MS

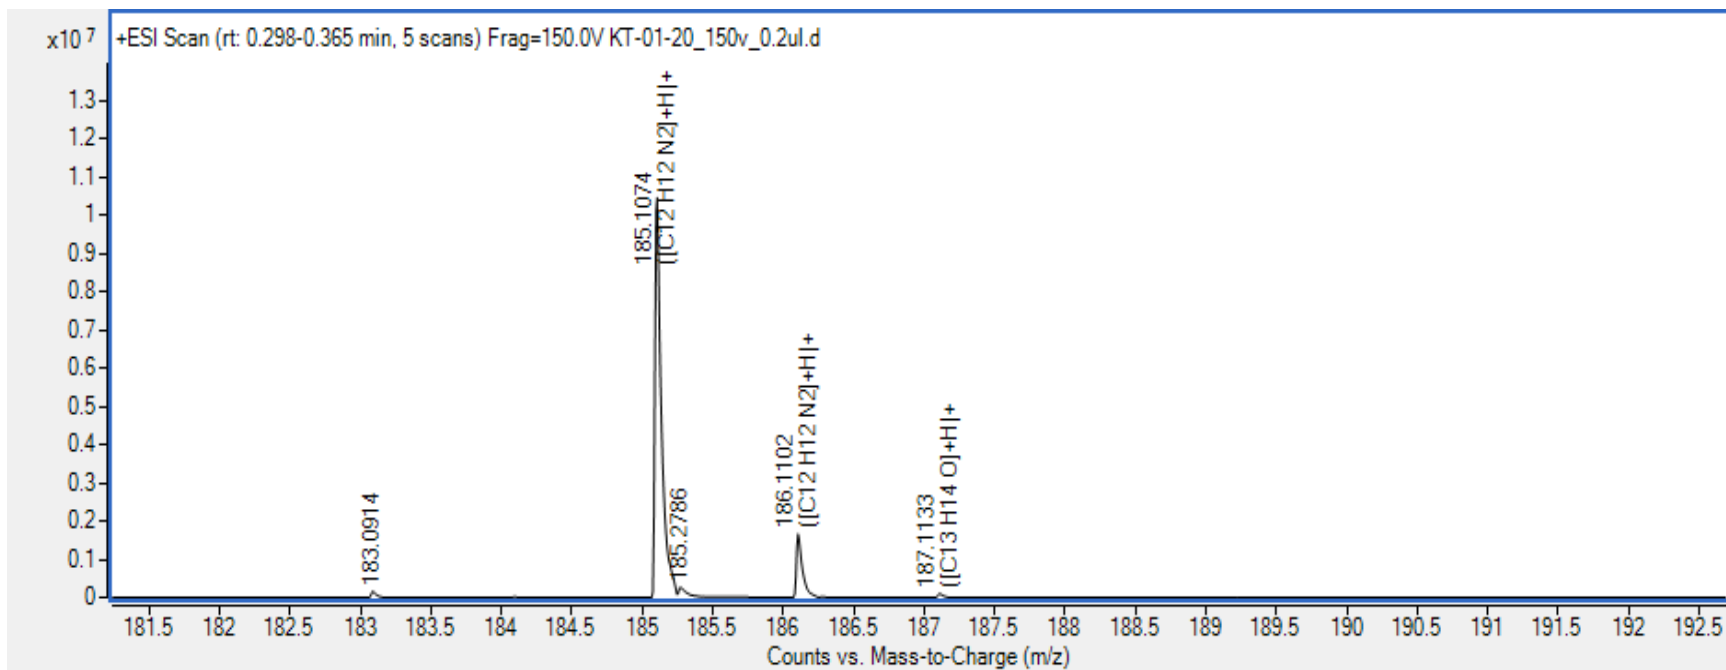

| Formula,    | Species, | m/z,      | Score, | Diff (abs. ppm), | Mass     |
|-------------|----------|-----------|--------|------------------|----------|
| C12 H12 N2, | (M+H)+,  | 185.1074, | 86.32, | 0.04,            | 184.1001 |

3-methyl-2H-benzo[g]indazole (P6): <sup>1</sup>H-NMR (CDCl<sub>3</sub>)

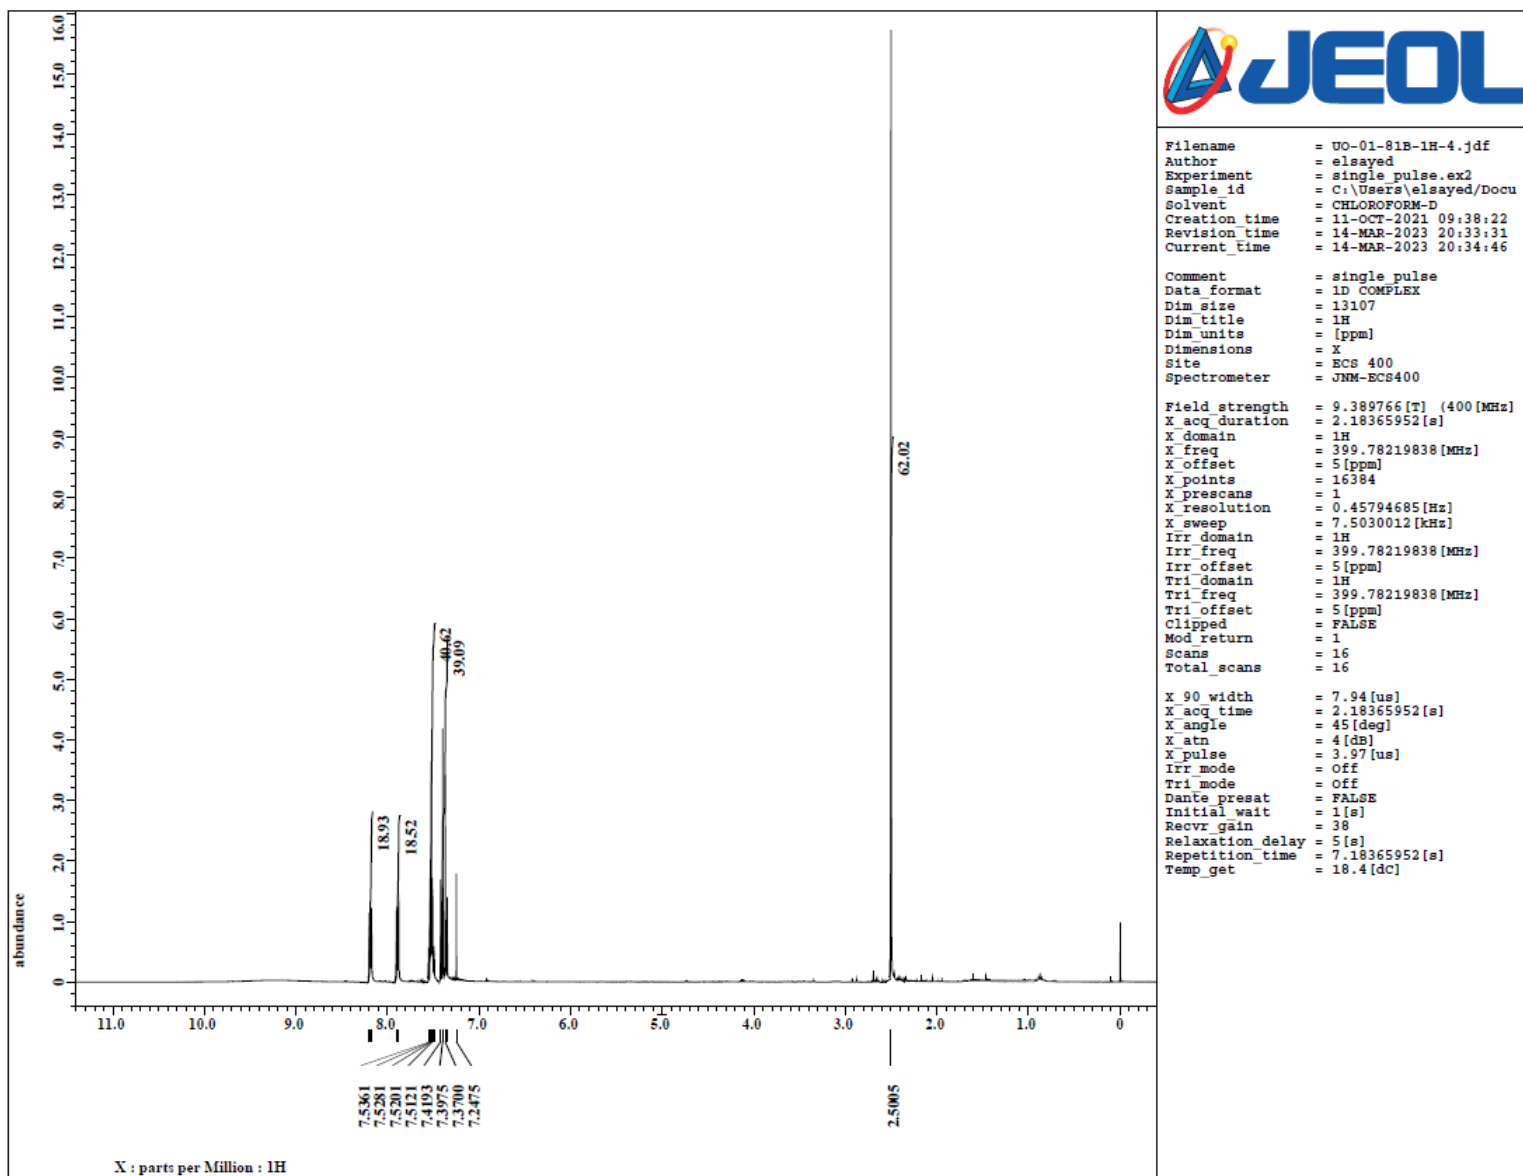

### 3-methyl-2H-benzo[g]indazole (P6): <sup>1</sup>H-NMR (CDCl<sub>3</sub>) \_ Expanded Aromatic Region

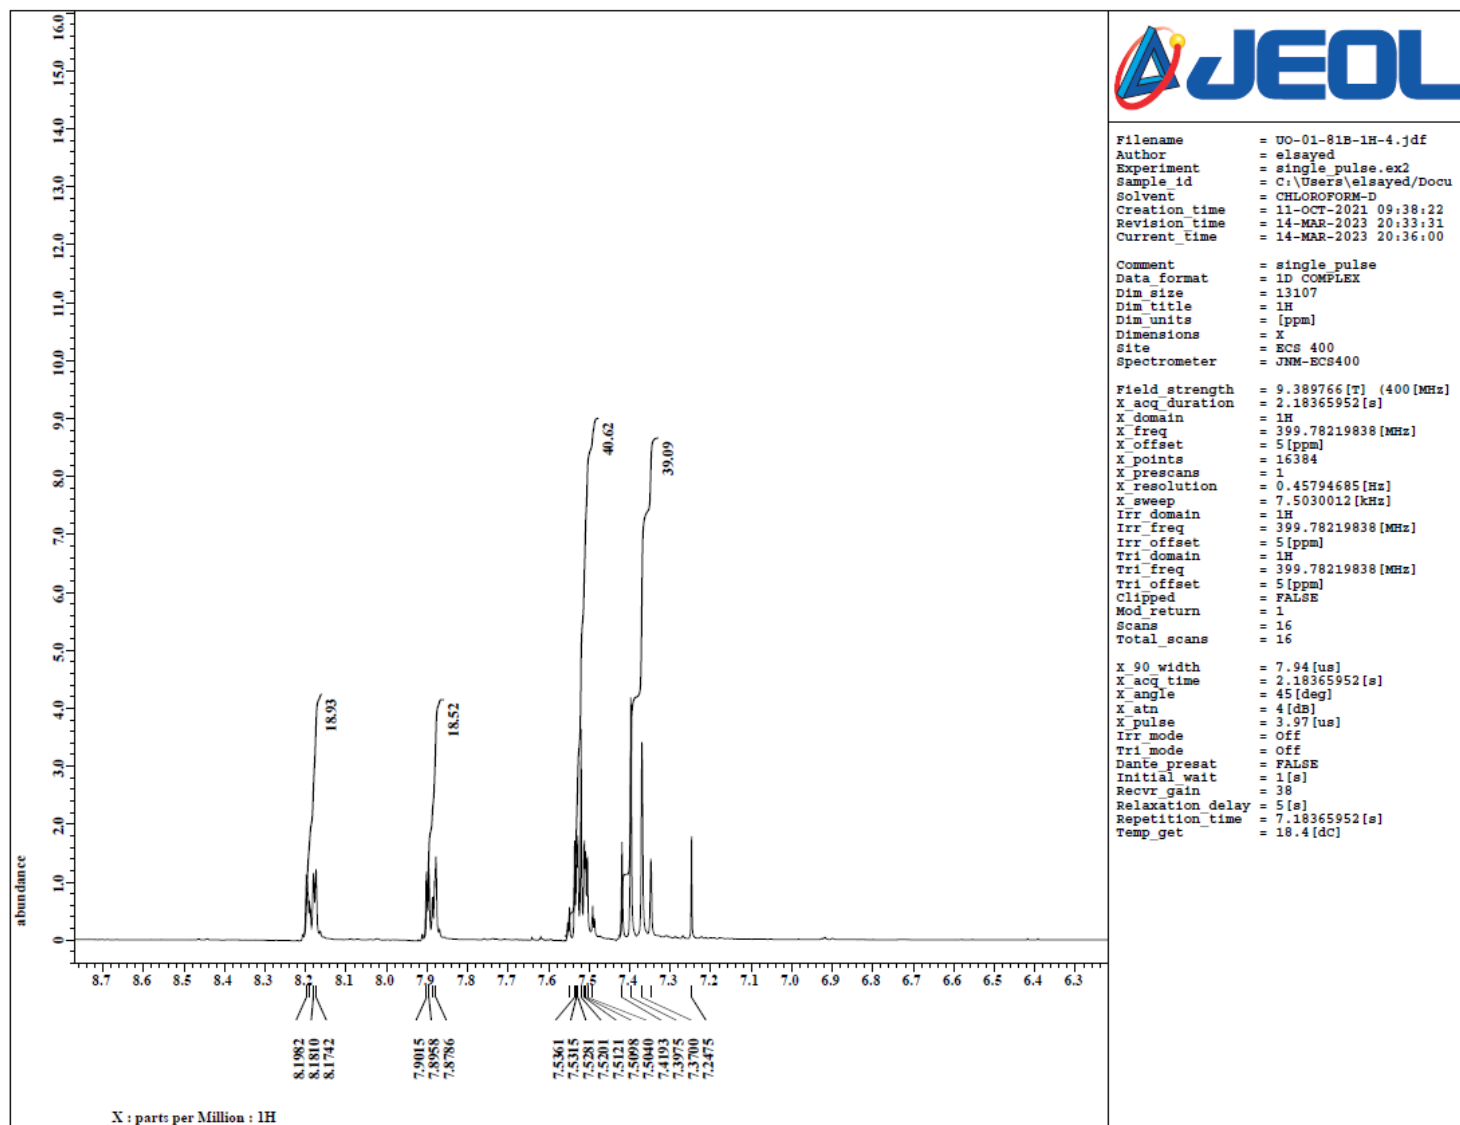



3-methyl-2H-benzo[g]indazole (P6):  $^{13}\text{C}$ -NMR ( $\text{CDCl}_3$ )

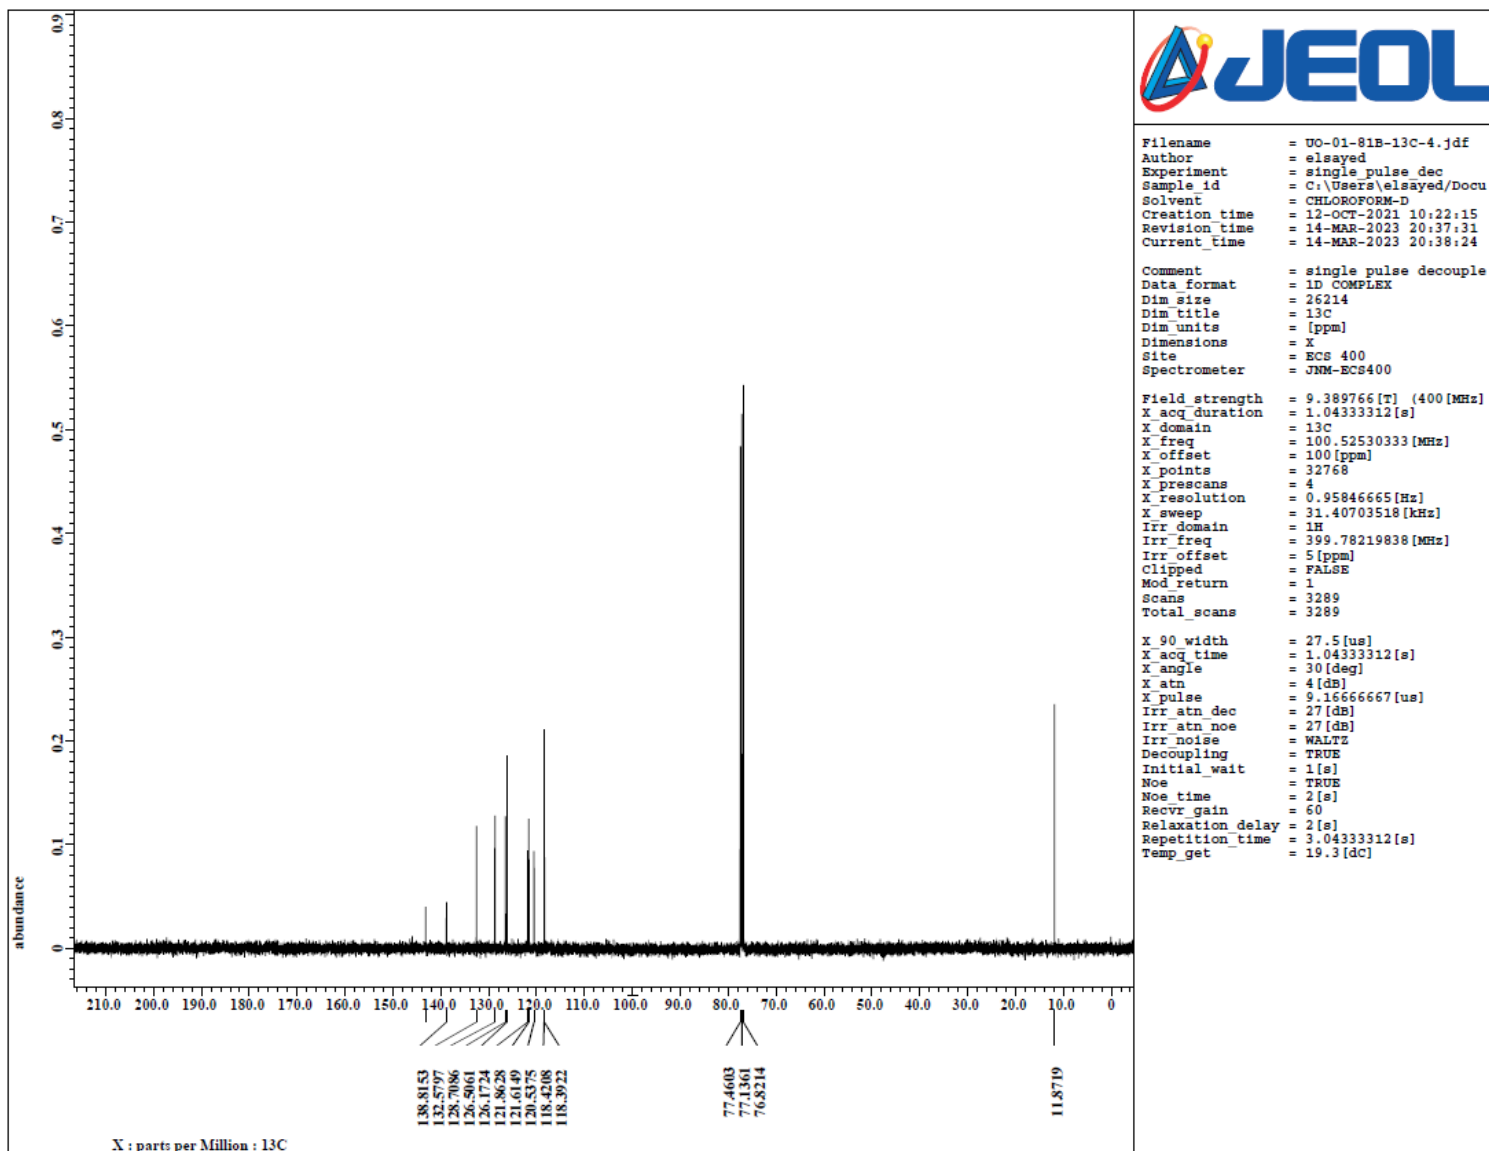

### 3-methyl-2H-benzo[g]indazole (P6): <sup>13</sup>C-NMR (CDCl<sub>3</sub>) \_ Expanded Aromatic Region

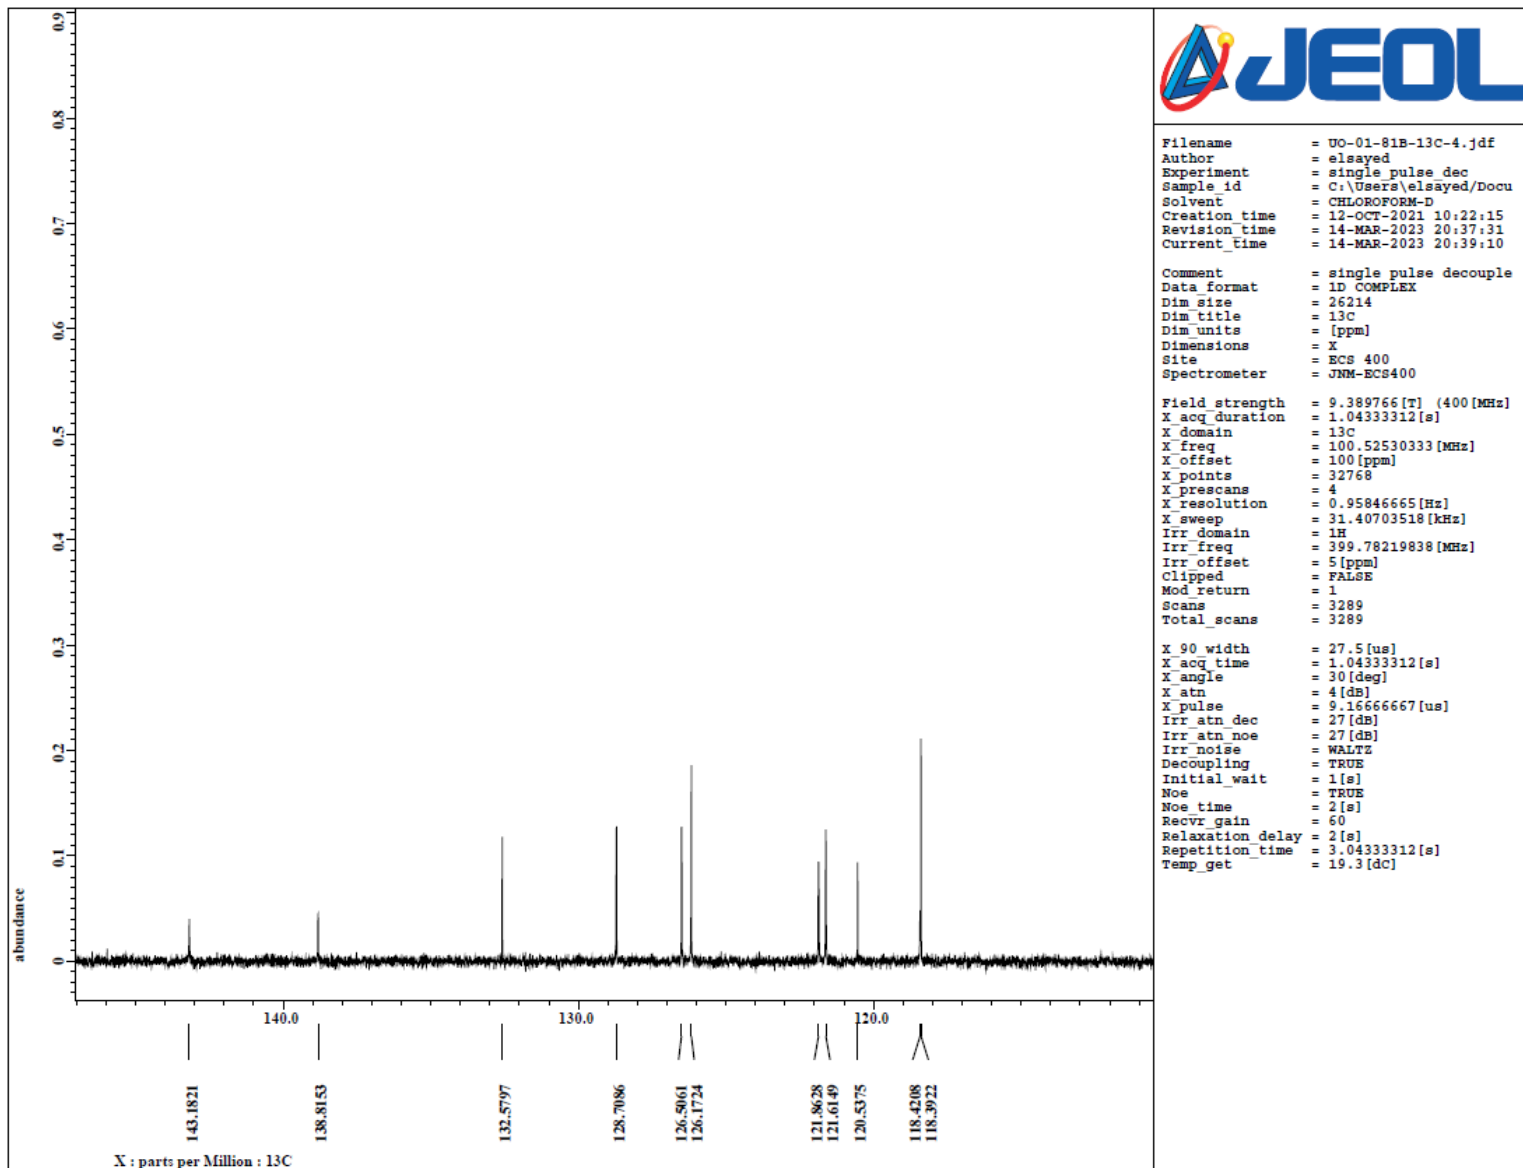

### 3-methyl-2H-benzo[g]indazole (P6): ESI-MS

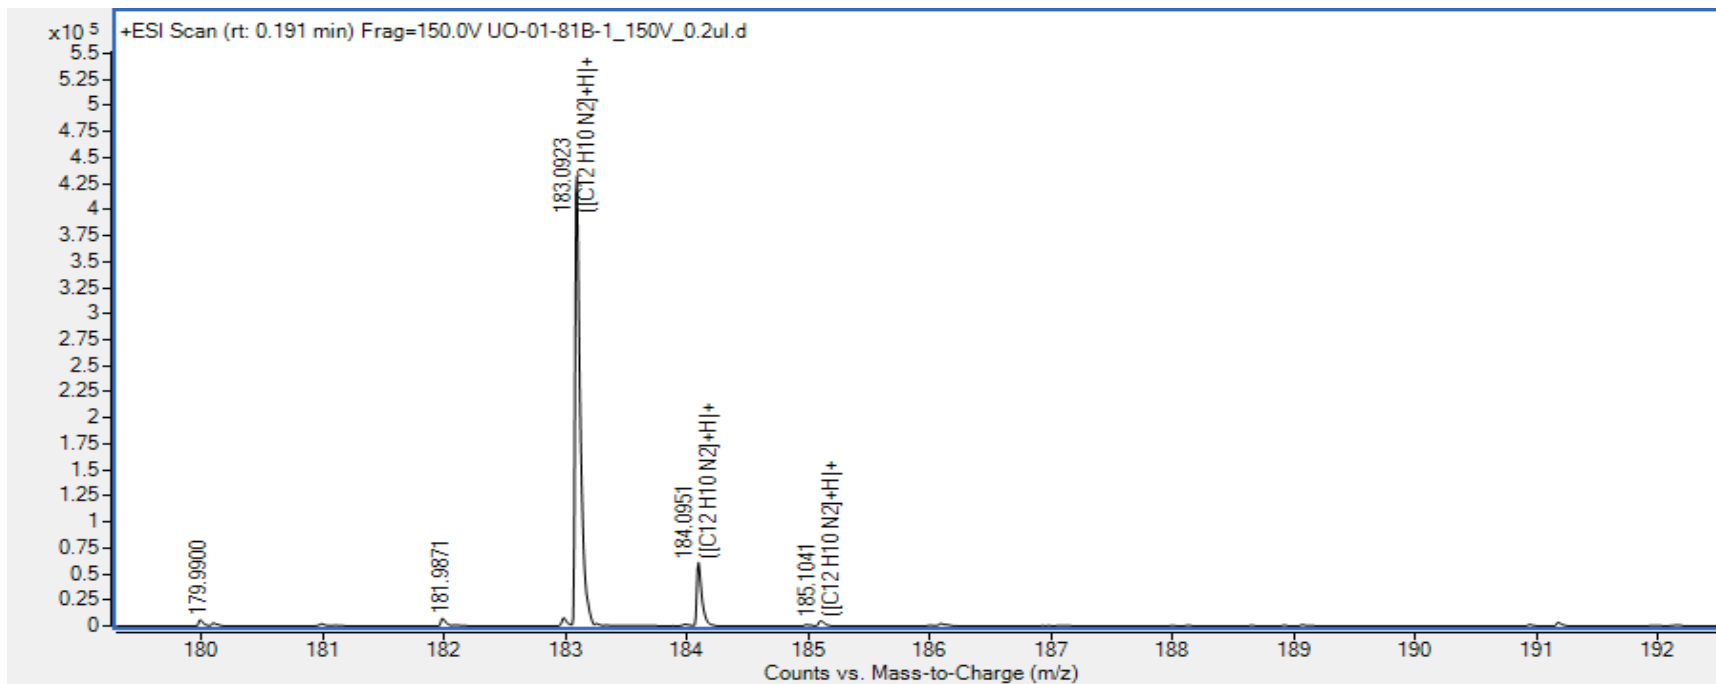

| Formula    | Species | m/z      | Diff (abs. ppm) | Score | Mass    |
|------------|---------|----------|-----------------|-------|---------|
| C12 H10 N2 | (M+H)+  | 183.0923 | 3.55            | 97.29 | 182.085 |

4-ethyl-3,5-dimethyl-1-phenyl-1H-pyrazole (P7): <sup>1</sup>H-NMR (CDCl<sub>3</sub>)

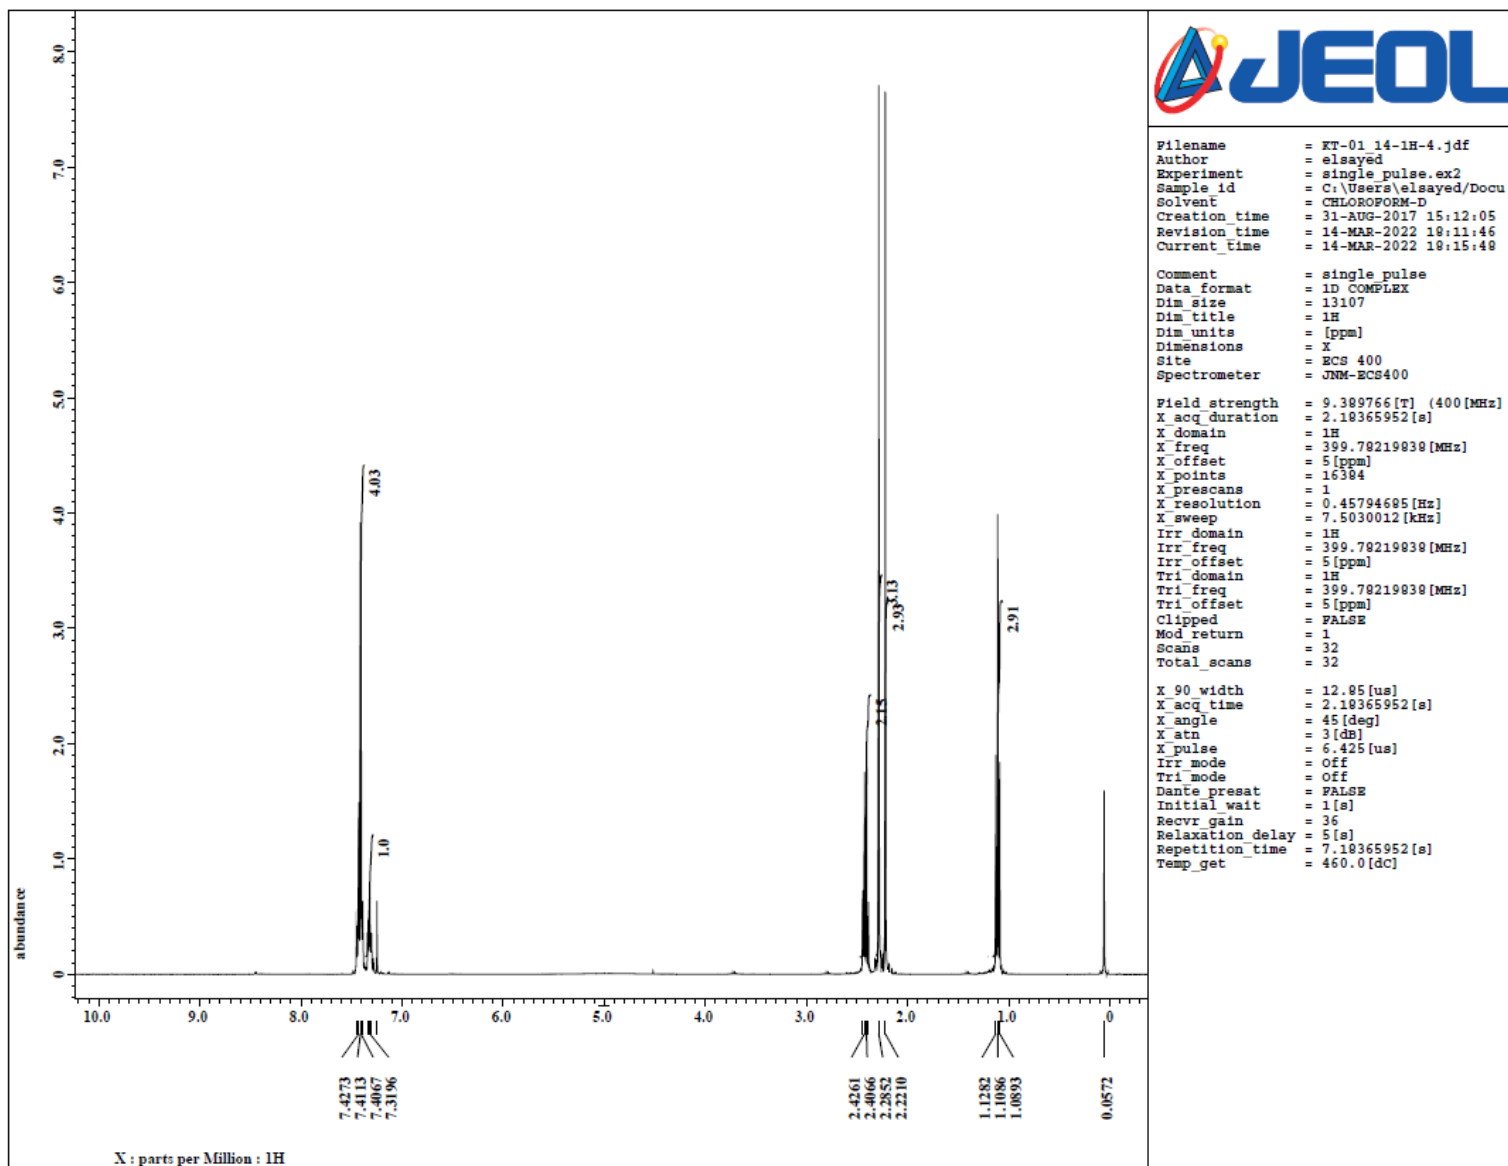

### 4-ethyl-3,5-dimethyl-1-phenyl-1H-pyrazole (P7): <sup>1</sup>H-NMR (CDCl<sub>3</sub>) \_ Expanded Aromatic Region

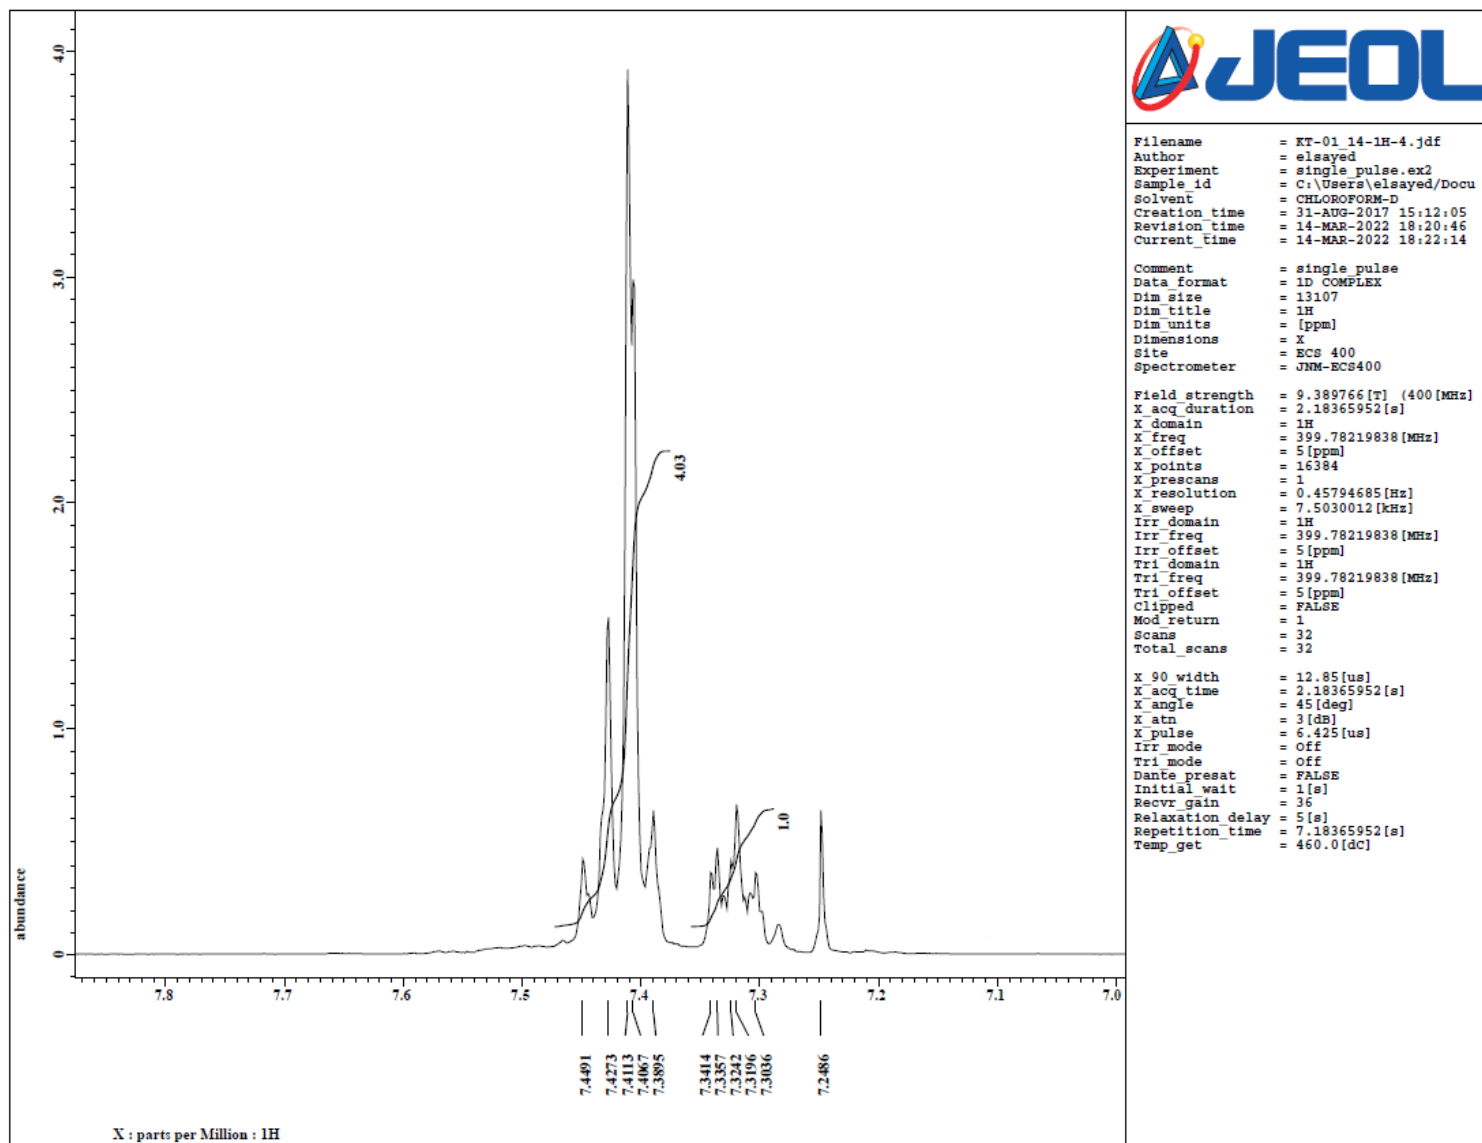

4-ethyl-3,5-dimethyl-1-phenyl-1H-pyrazole (P7): <sup>13</sup>C-NMR (CDCl<sub>3</sub>)

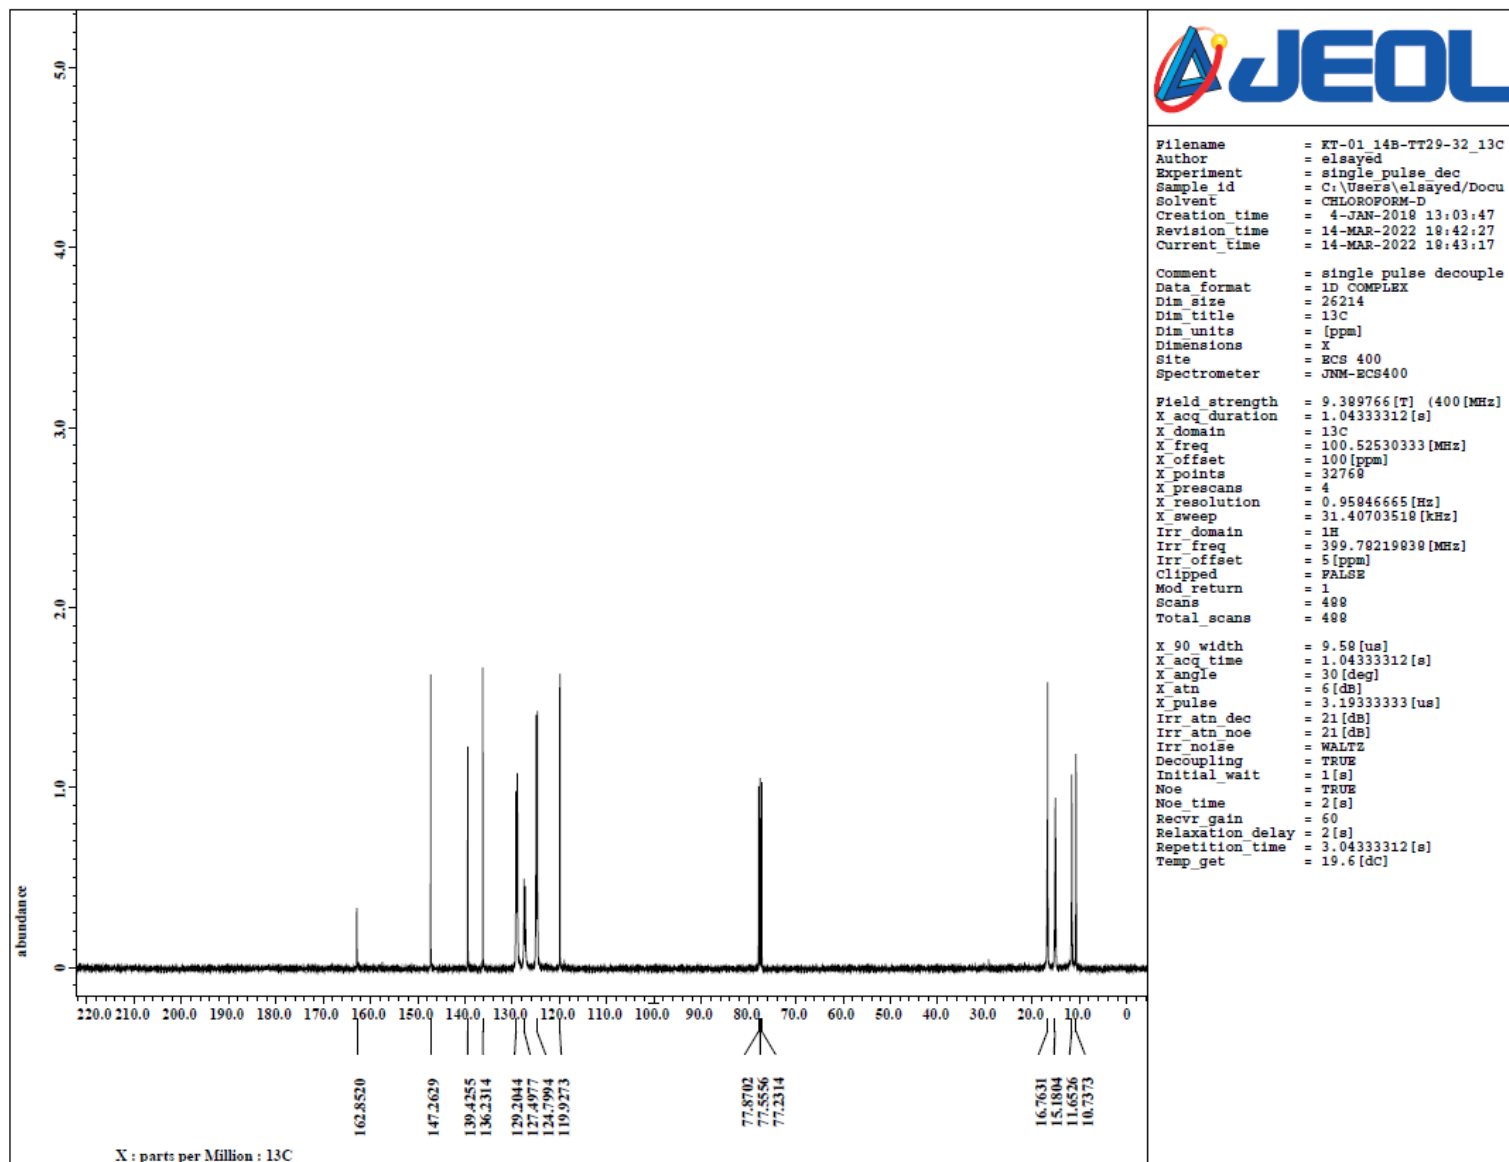

#### 4-ethyl-3,5-dimethyl-1-phenyl-1H-pyrazole (P7): ESI-MS

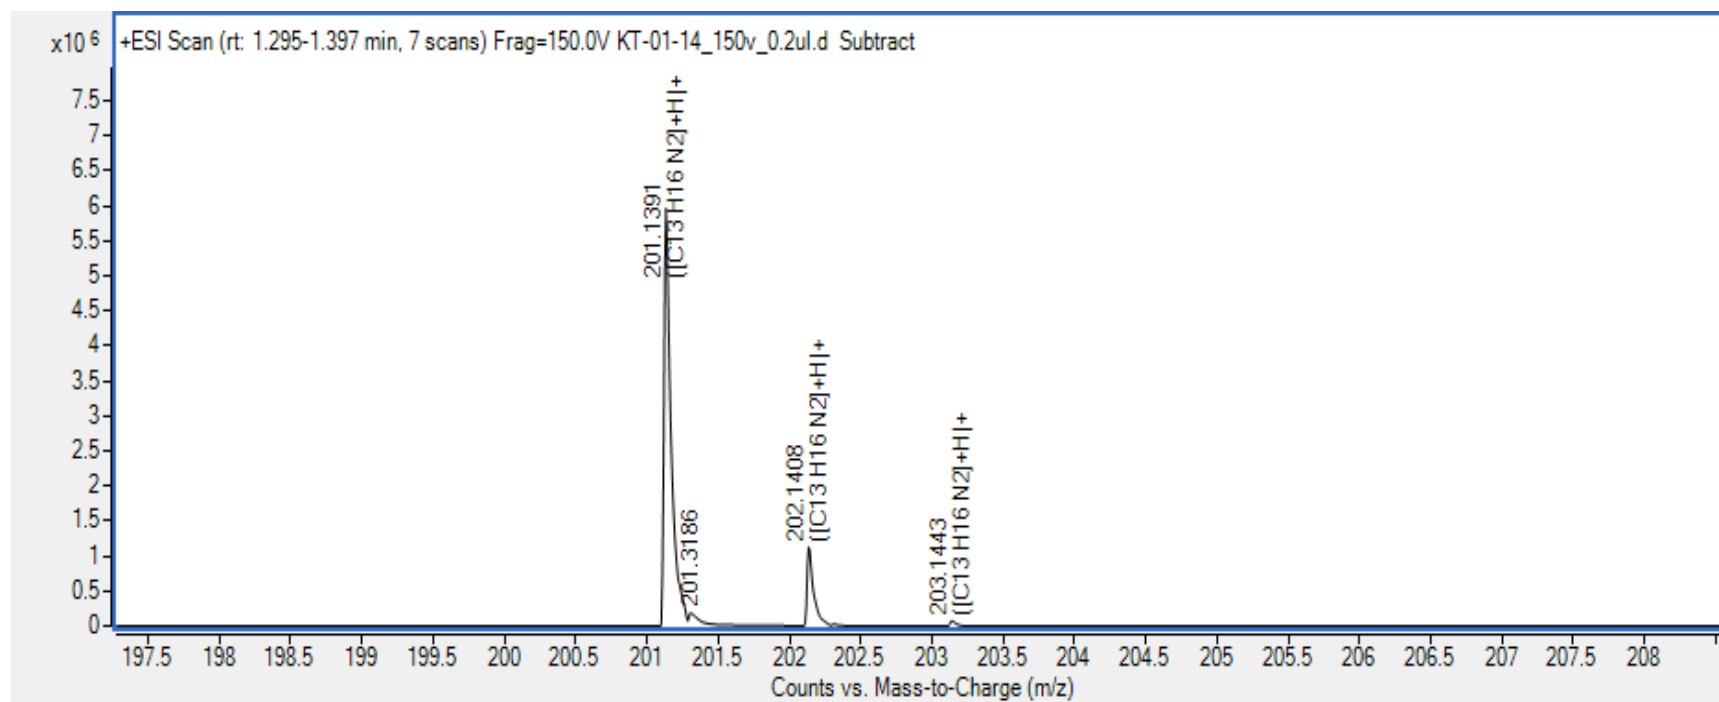

| Formula,    | Species, | m/z,      | Score, | Diff (abs. ppm), | Mass     |
|-------------|----------|-----------|--------|------------------|----------|
| C13 H16 N2, | (M+H)+,  | 201.1391, | 92.34, | 1.02,            | 200.1316 |

### 3-methyl-1-phenyl-1,4,5,6-tetrahydrocyclopenta[c]pyrazole (P8): <sup>1</sup>H-NMR (CDCl<sub>3</sub>)

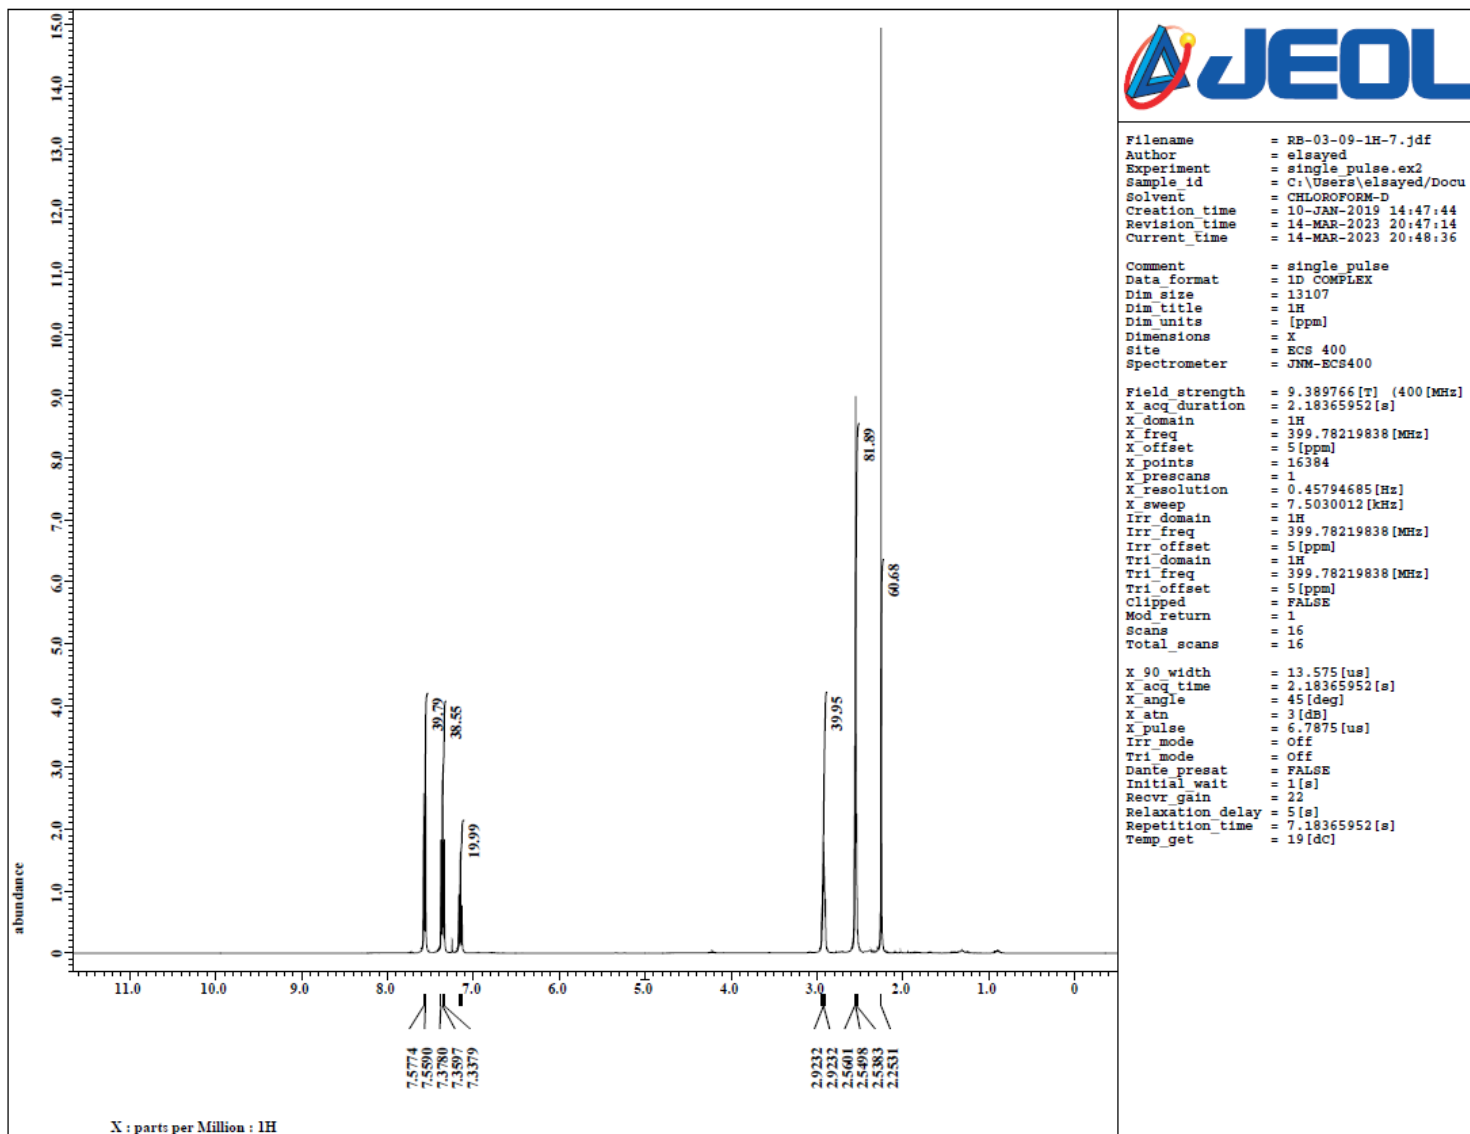



### 3-methyl-1-phenyl-1,4,5,6-tetrahydrocyclopenta[c]pyrazole (P8): <sup>1</sup>H-NMR (CDCl<sub>3</sub>) \_ Expanded Aliphatic Region

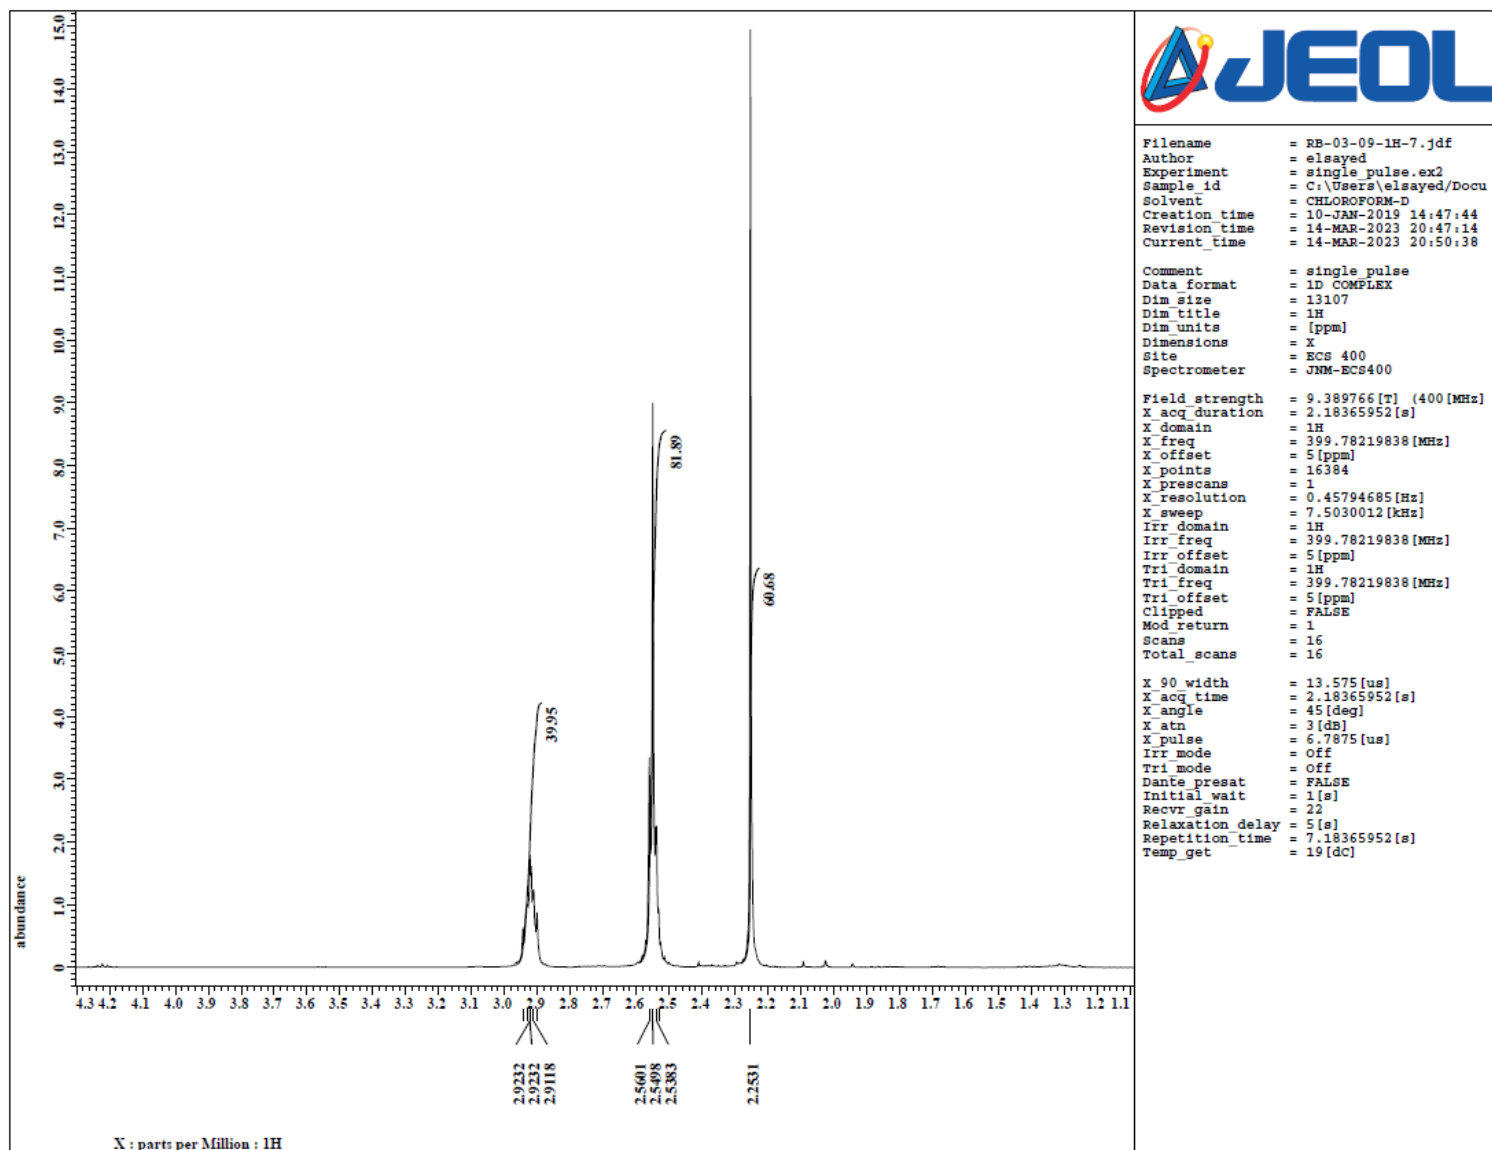

### 3-methyl-1-phenyl-1,4,5,6-tetrahydrocyclopenta[c]pyrazole (P8): <sup>1</sup>H-NMR (CDCl<sub>3</sub>) \_ Expanded Aromatic Region

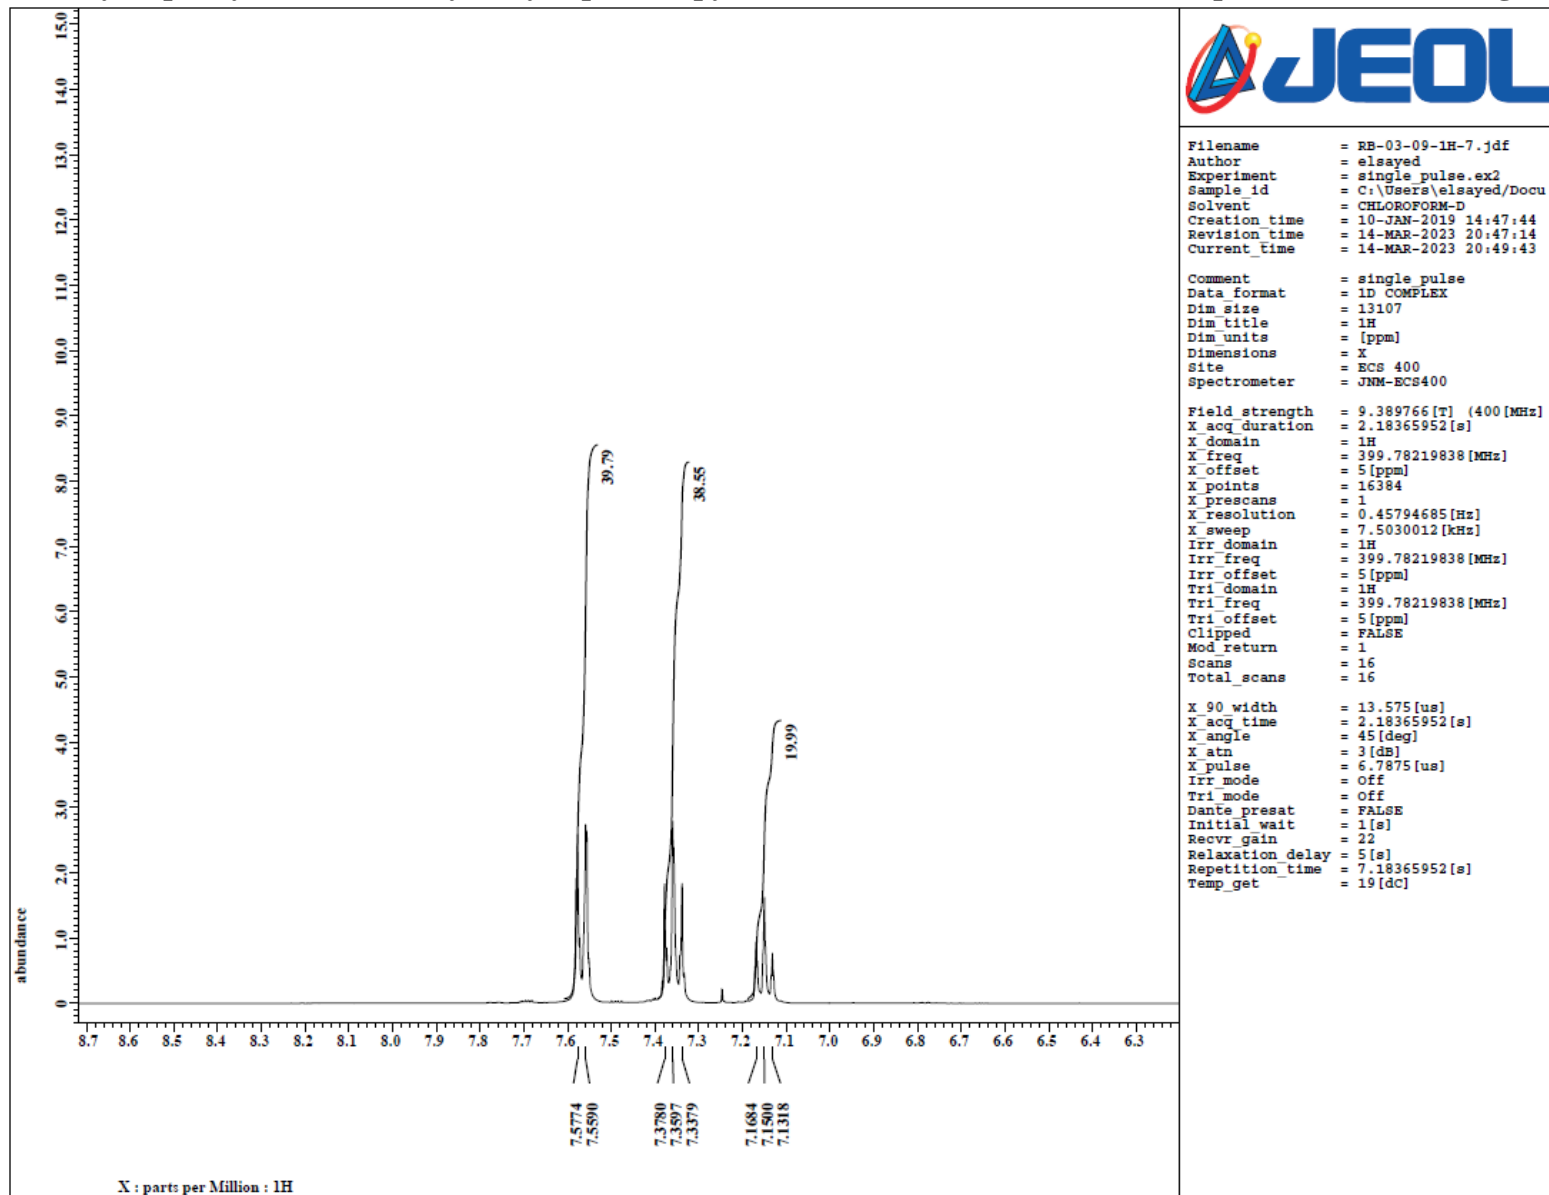

3-methyl-1-phenyl-1,4,5,6-tetrahydrocyclopenta[c]pyrazole (P8): <sup>13</sup>C-NMR (CDCl<sub>3</sub>)

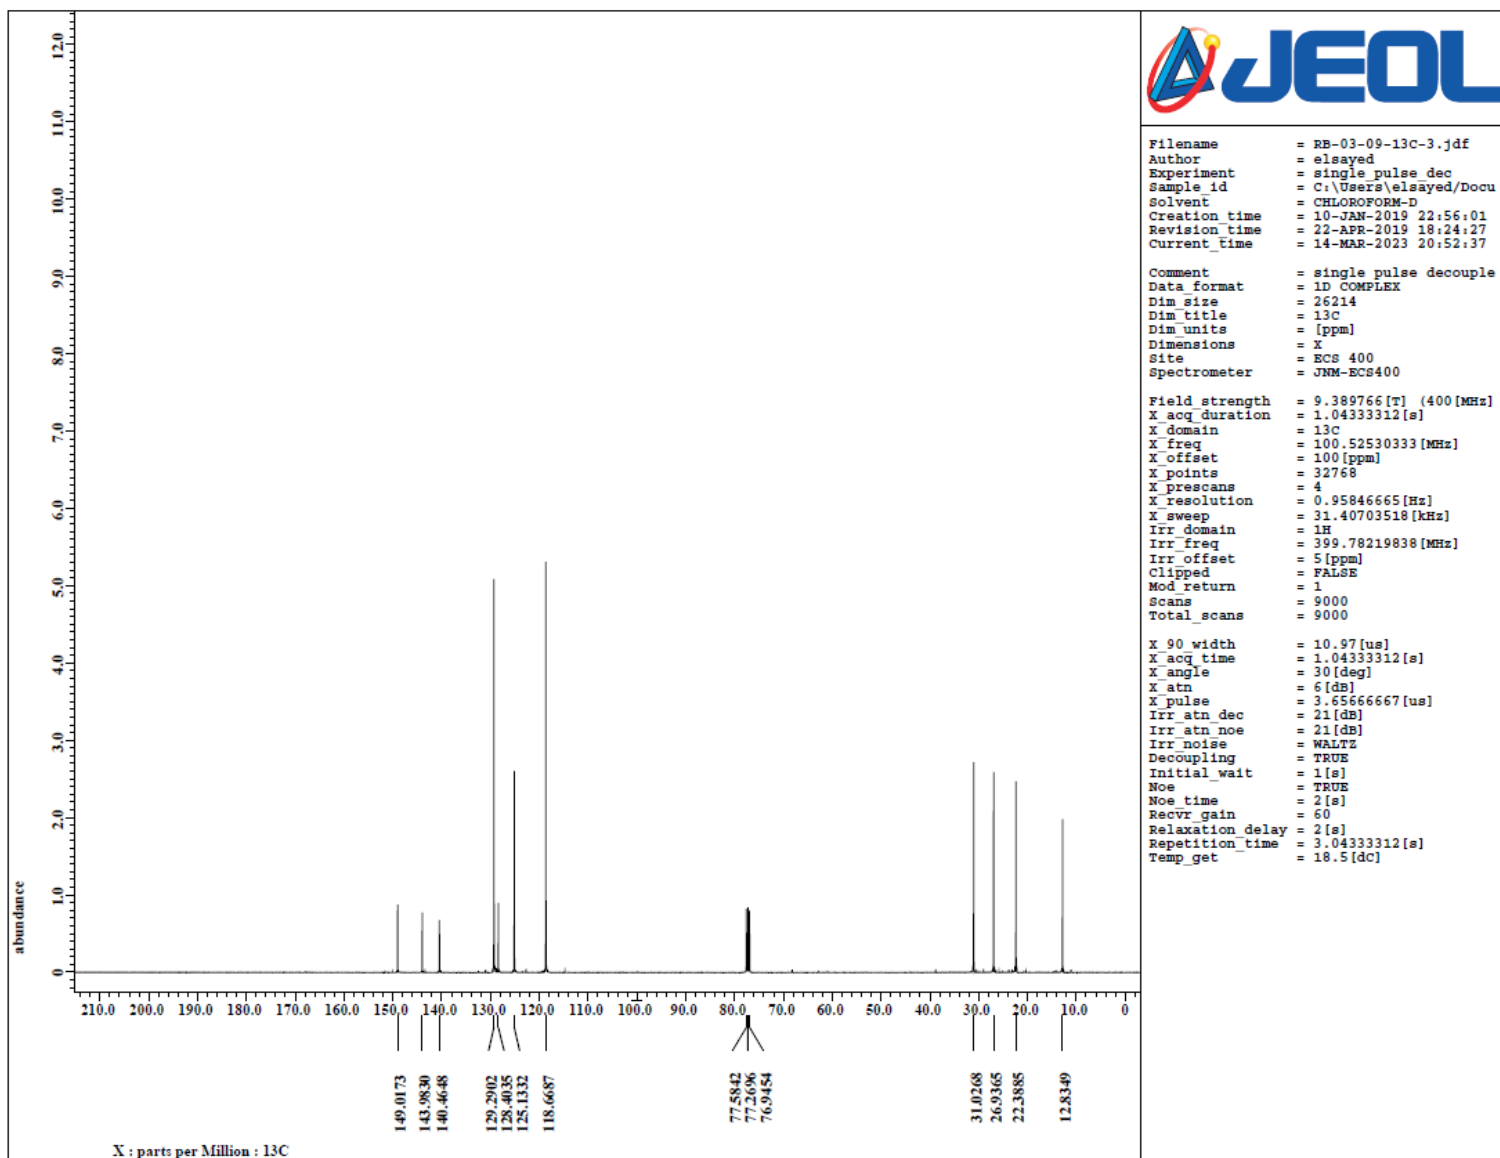

### 3-methyl-1-phenyl-1,4,5,6-tetrahydrocyclopenta[c]pyrazole (P8): ESI-MS

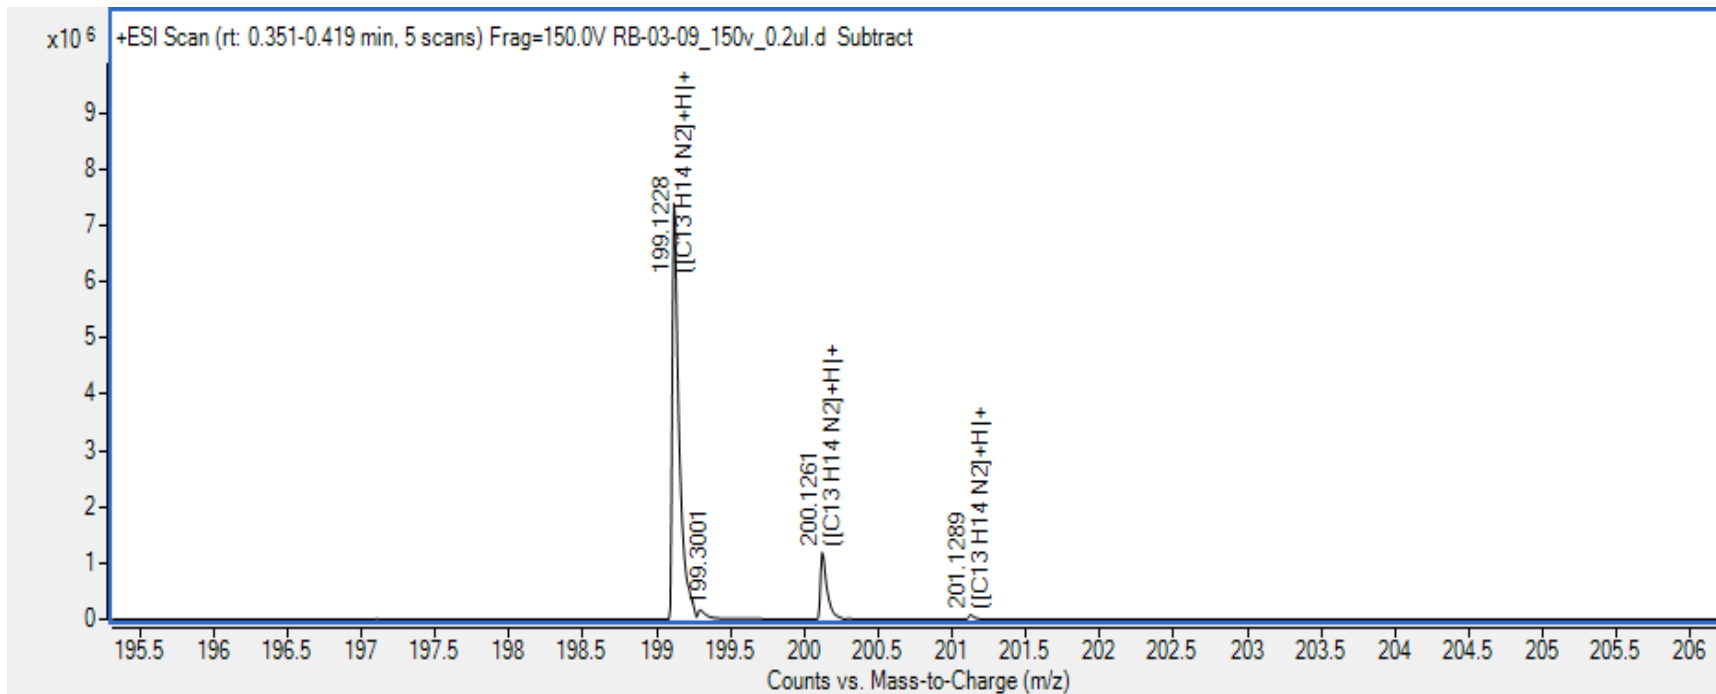

| Formula,    | Species, | m/z,      | Score, | Diff (abs. ppm), | Mass     |
|-------------|----------|-----------|--------|------------------|----------|
| C13 H14 N2, | (M+H)+,  | 199.1228, | 99.52, | 0.57,            | 198.1156 |

### 3-methyl-2-phenyl-4,5-dihydro-2H-benzo[g]indazole (P9): <sup>1</sup>H-NMR (CDCl<sub>3</sub>)

<sup>1</sup>H NMR of P9

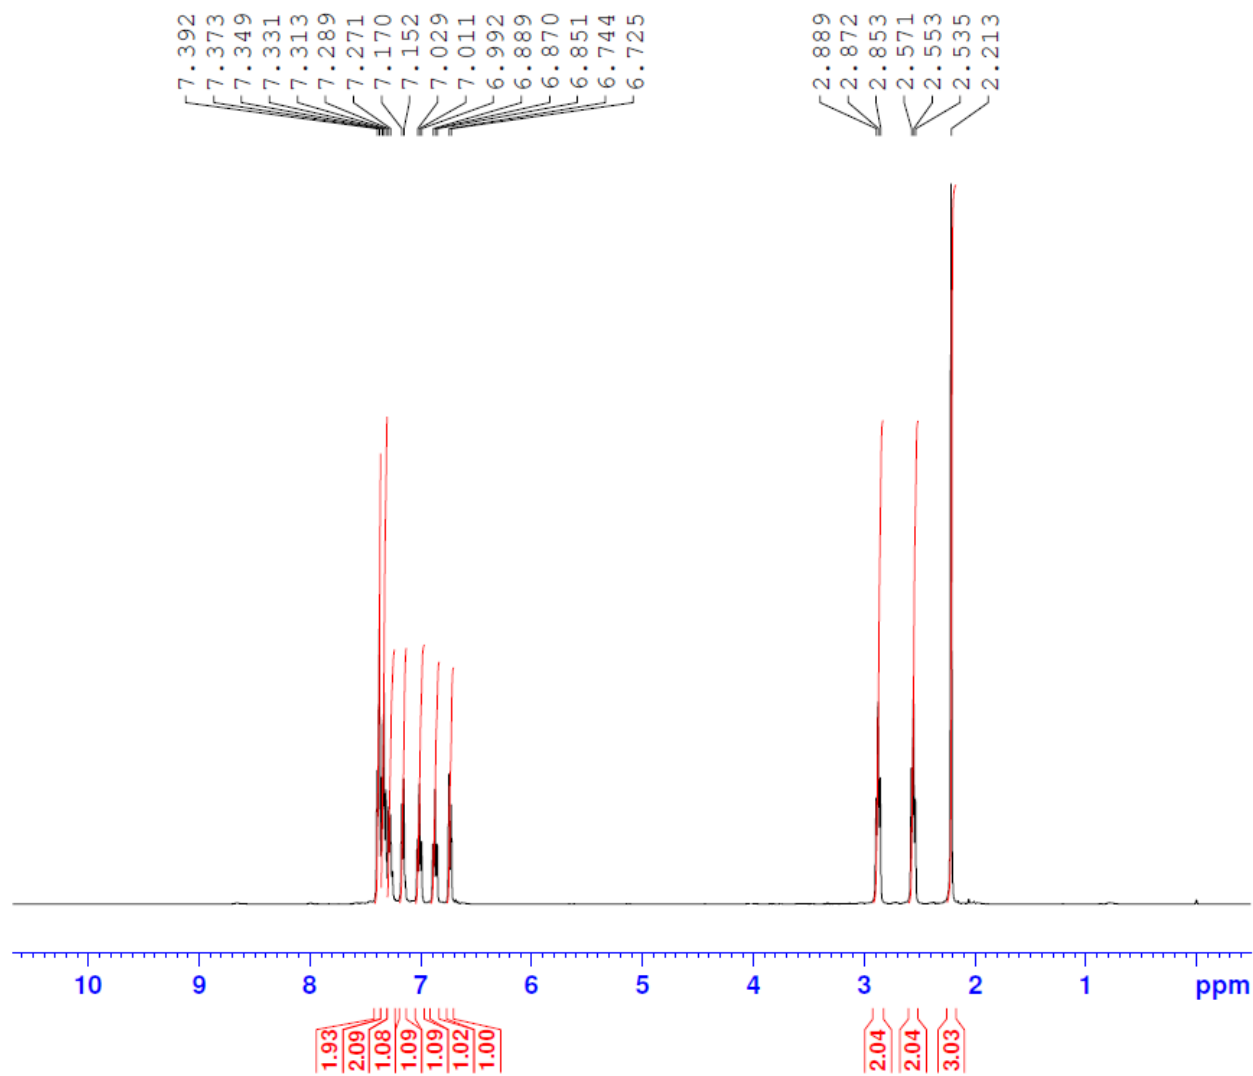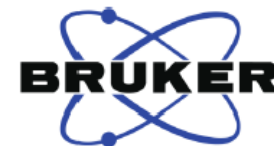

Current Data Parameters  
NAME SM-P9\_1H  
EXPNO 10  
PROCNO 1

F2 - Acquisition Parameters  
Date\_ 20230317  
Time 16.15 h  
INSTRUM Avance Neo  
PROBHD Z140678\_0053 (  
PULPROG zg30  
TD 65536  
SOLVENT CDCl3  
NS 16  
DS 2  
SWH 8196.722 Hz  
FIDRES 0.250144 Hz  
AQ 3.9976959 sec  
RG 45.2  
DW 61.000 usec  
DE 13.54 usec  
TE 296.3 K  
D1 1.00000000 sec  
TD0 1  
SFO1 400.1424709 MHz  
NUC1 1H  
P0 3.33 usec  
P1 10.00 usec  
PLW1 22.64200020 W

F2 - Processing parameters  
SI 65536  
SF 400.1400589 MHz  
WDW EM  
SSB 0  
LB 0.30 Hz  
GB 0  
PC 1.00

### 3-methyl-2-phenyl-4,5-dihydro-2H-benzo[g]indazole (P9): <sup>1</sup>H-NMR (CDCl<sub>3</sub>) \_ Expanded Aromatic Region

<sup>1</sup>H NMR of P9

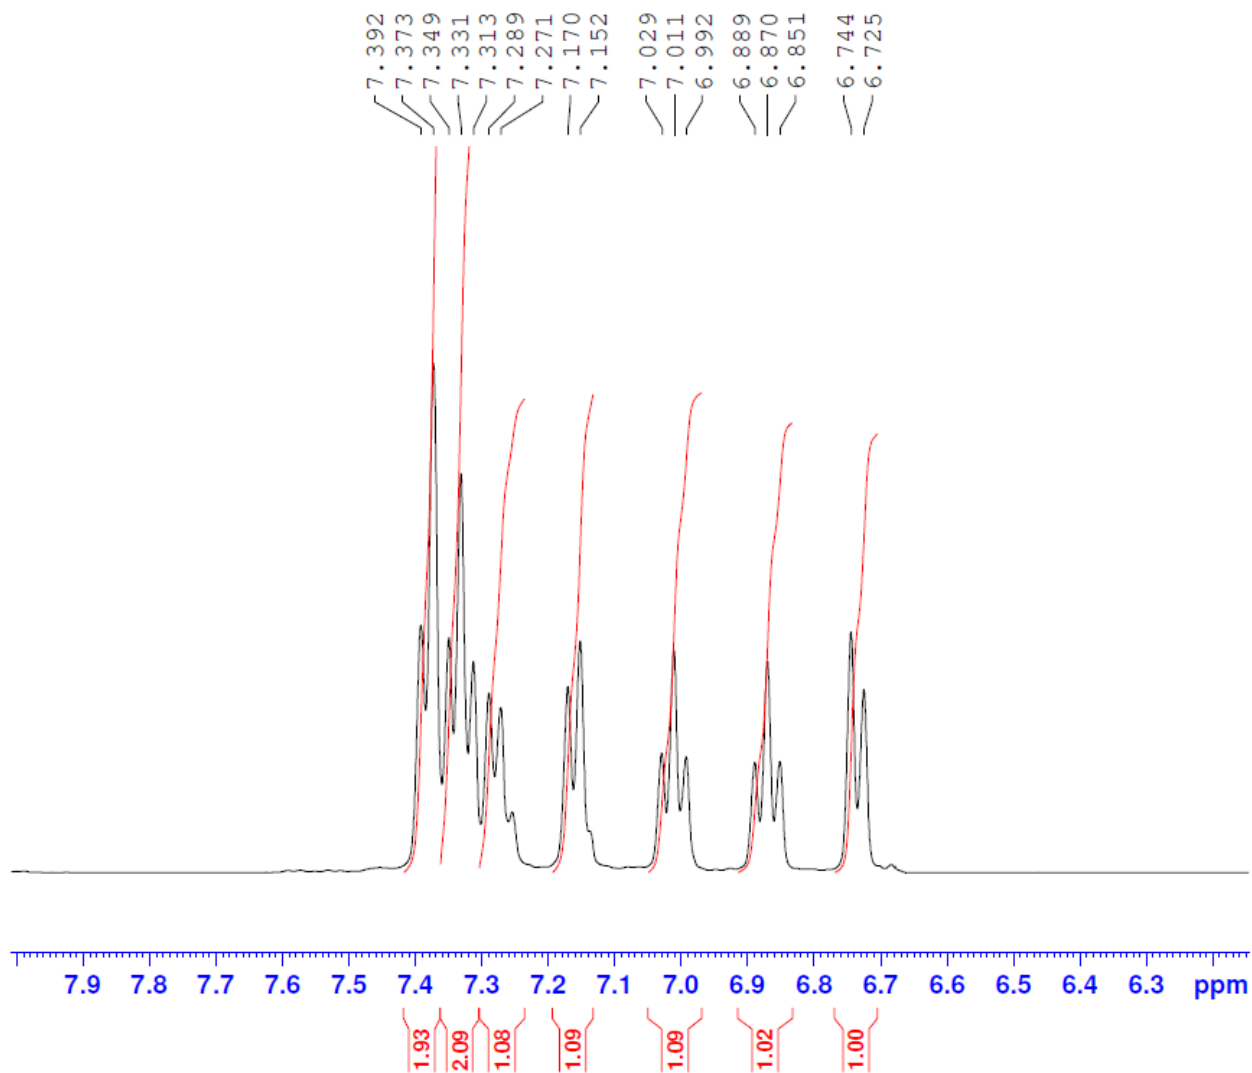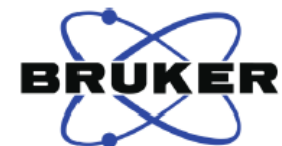

Current Data Parameters  
NAME SM-P9\_1H  
EXPNO 10  
PROCNO 1

F2 - Acquisition Parameters  
Date\_ 20230317  
Time 16.15 h  
INSTRUM Avance Neo  
PROBHD Z140678\_0053 (   
PULPROG zg30  
TD 65536  
SOLVENT CDCl3  
NS 16  
DS 2  
SWH 8196.722 Hz  
FIDRES 0.250144 Hz  
AQ 3.9976959 sec  
RG 45.2  
DW 61.000 usec  
DE 13.54 usec  
TE 296.3 K  
D1 1.00000000 sec  
TD0 1  
SFO1 400.1424709 MHz  
NUC1 1H  
P0 3.33 usec  
P1 10.00 usec  
PLW1 22.64200020 W

F2 - Processing parameters  
SI 65536  
SF 400.1400589 MHz  
WDW EM  
SSB 0  
LB 0.30 Hz  
GB 0  
PC 1.00

3-methyl-2-phenyl-4,5-dihydro-2H-benzo[g]indazole (P9): <sup>13</sup>C-NMR (CDCl<sub>3</sub>)

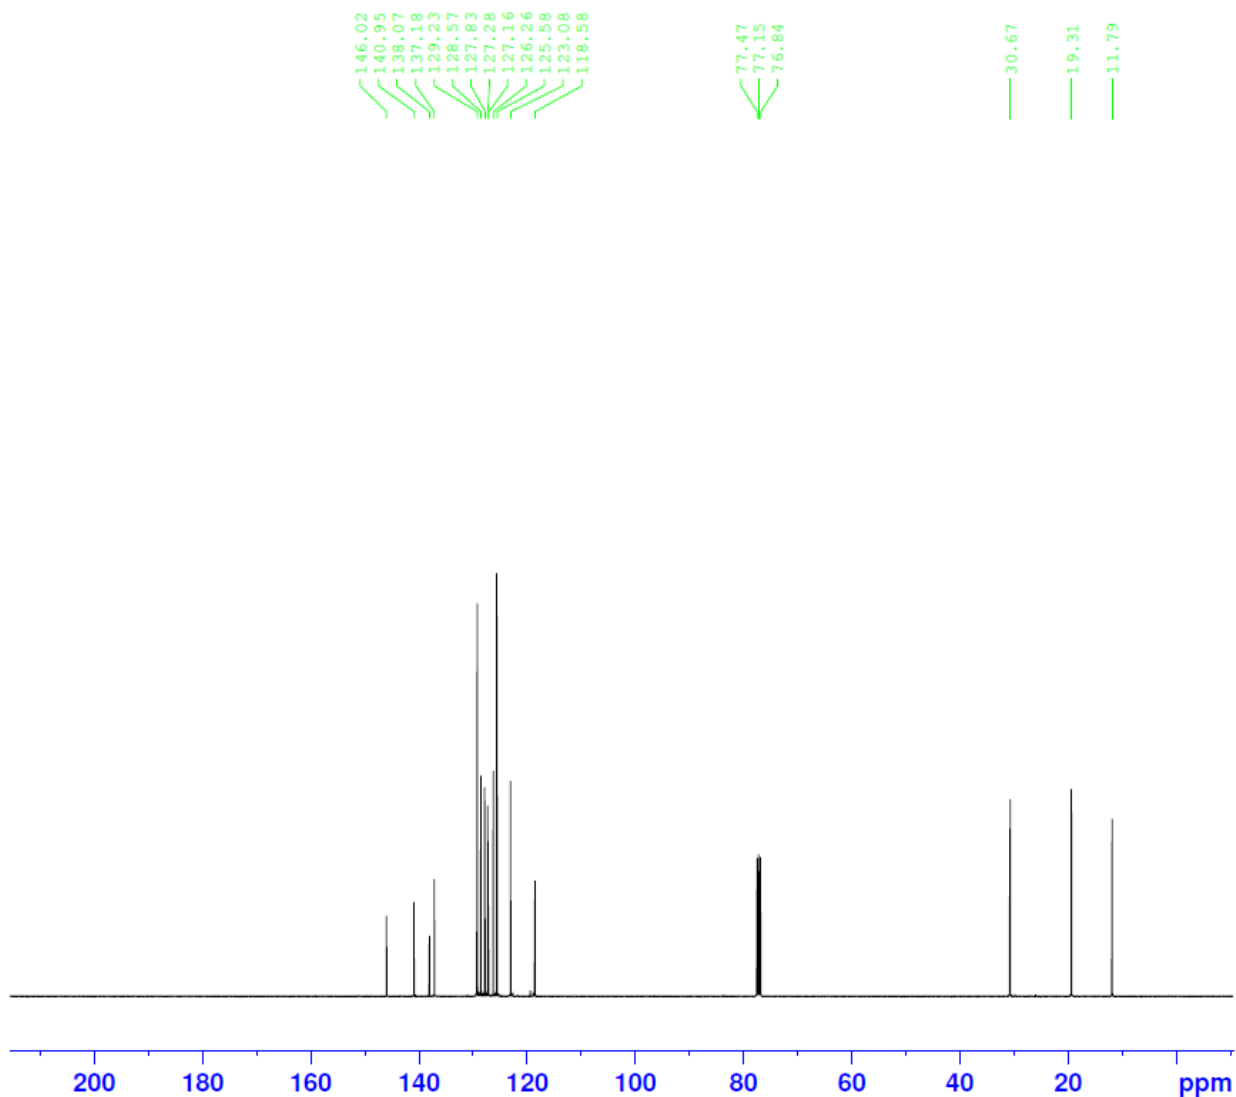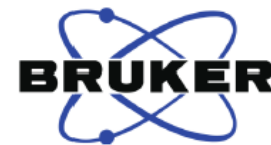

Current Data Parameters  
NAME SM-P-9\_1Hand13C  
EXPNO 11  
PROCNO 1

F2 - Acquisition Parameters  
Date\_ 20230318  
Time 1.22 h  
INSTRUM Avance Neo  
PROBHD z140678\_0053 (zpgpg30)  
PULPROG 65536  
TD 4096  
SOLVENT CDC13  
NS 4  
DS 4  
SWH 23809.523 Hz  
FIDRES 0.726609 Hz  
AQ 1.3762560 sec  
RG 16  
DW 21.000 usec  
DE 6.50 usec  
TE 296.6 K  
D1 2.00000000 sec  
D11 0.03000000 sec  
TD0 1  
SFO1 100.6253446 MHz  
NUC1 13C  
P0 3.33 usec  
P1 10.00 usec  
PLW1 77.80000305 W  
SFO2 400.1416006 MHz  
NUC2 1H  
PCPD2 90.00 usec  
PLW2 22.64200020 W  
PLW12 0.27952999 W  
PLW13 0.14060000 W

F2 - Processing parameters  
SI 32768  
SF 100.6152830 MHz  
WDW EM  
SSB 0  
LB 1.00 Hz  
GB 0  
PC 1.40

3-methyl-2-phenyl-4,5-dihydro-2H-benzo[g]indazole (P9): <sup>13</sup>C-NMR (CDCl<sub>3</sub>) \_ Expanded Aromatic Region

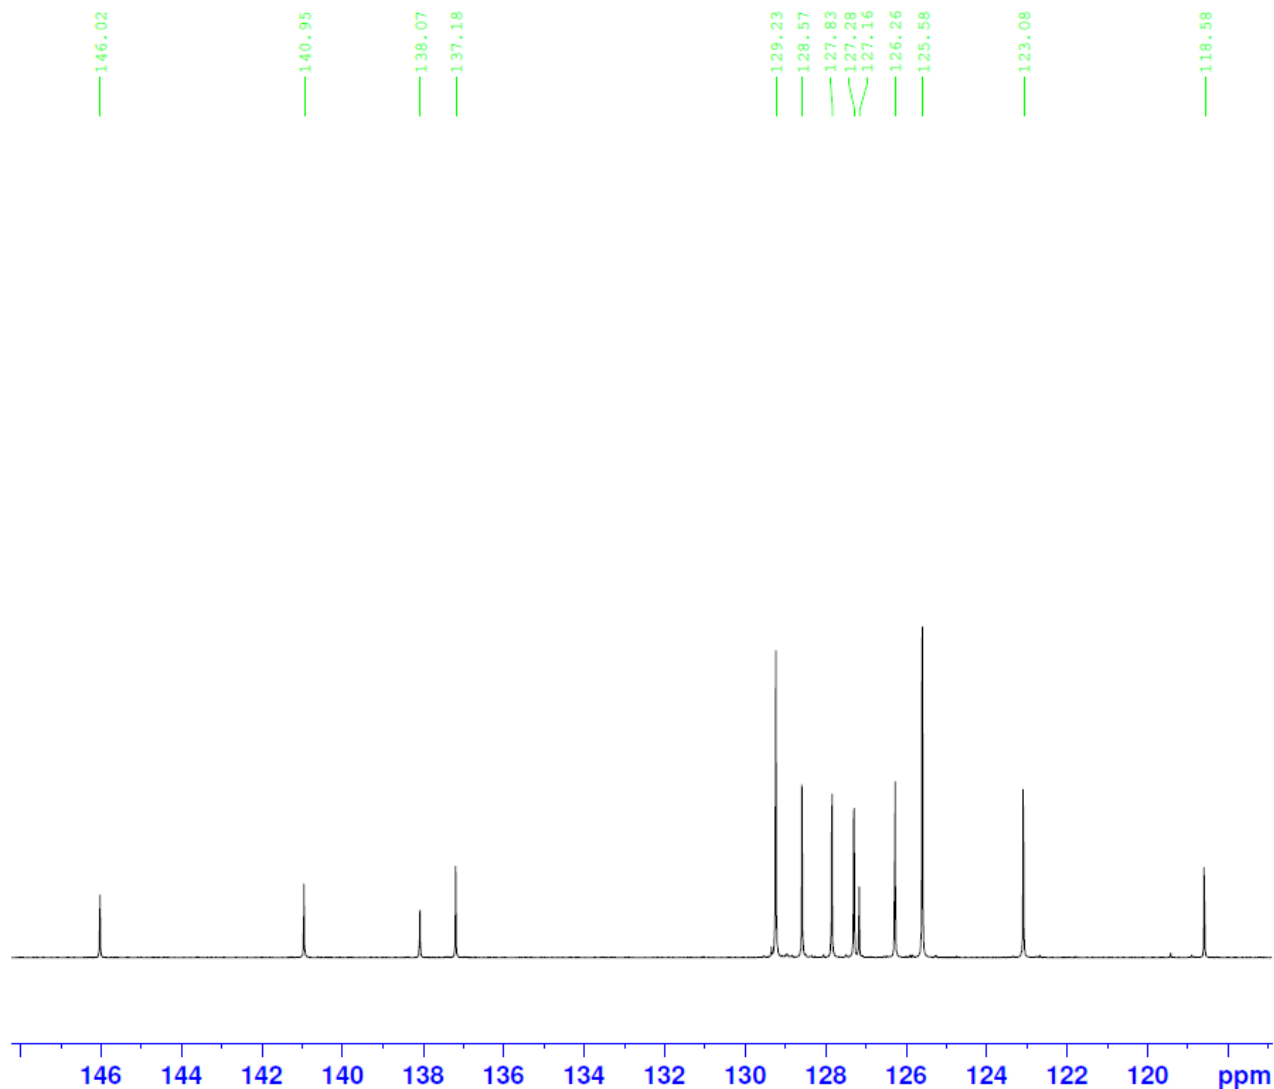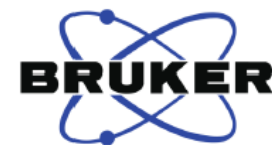

Current Data Parameters  
 NAME SM-P-9\_1Hand13C  
 EXPNO 11  
 PROCNO 1

F2 - Acquisition Parameters  
 Date\_ 20230318  
 Time 1.22 h  
 INSTRUM Avance Neo  
 PROBHD Z140678\_0053 (  
 PULPROG zgpg30  
 TD 65536  
 SOLVENT CDCl3  
 NS 4096  
 DS 4  
 SWH 23809.523 Hz  
 FIDRES 0.726609 Hz  
 AQ 1.3762560 sec  
 RG 16  
 DW 21.000 usec  
 DE 6.50 usec  
 TE 296.6 K  
 D1 2.00000000 sec  
 D11 0.03000000 sec  
 TD0 1  
 SFO1 100.6253446 MHz  
 NUC1 13C  
 P0 3.33 usec  
 P1 10.00 usec  
 PLW1 77.80000305 W  
 SFO2 400.1416006 MHz  
 NUC2 1H  
 CPDPRG[2] waltz65  
 PCPD2 90.00 usec  
 PLW2 22.64200020 W  
 PLW12 0.27952999 W  
 PLW13 0.14060000 W

F2 - Processing parameters  
 SI 32768  
 SF 100.6152830 MHz  
 WDW EM  
 SSB 0  
 LB 1.00 Hz  
 GB 0  
 PC 1.40



### 3-methyl-2-phenyl-4,5-dihydro-2H-benzo[g]indazole (P9): ESI-MS

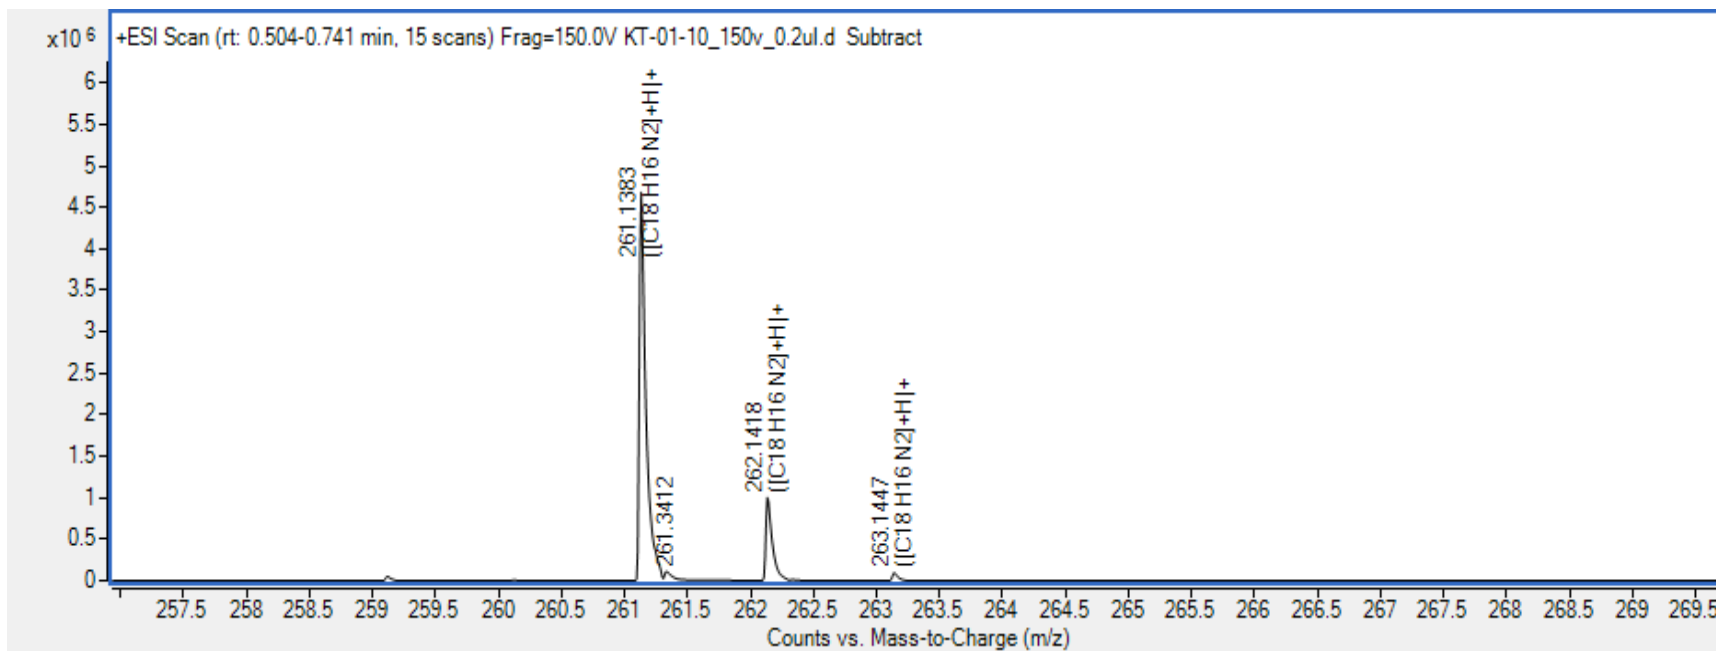

| Formula    | Species | m/z      | Score | Diff (abs. ppm) | Mass     |
|------------|---------|----------|-------|-----------------|----------|
| C18 H16 N2 | (M+H)+  | 261.1383 | 98.93 | 1.11            | 260.1311 |

Ethyl 3,5-dimethyl-1-phenyl-1H-pyrazole-4-carboxylate (P10): <sup>1</sup>H-NMR (CDCl<sub>3</sub>)

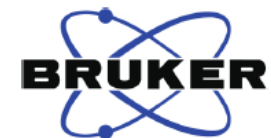

Current Data Parameters  
 NAME SM-P10\_1Hand13C  
 EXPNO 10  
 PROCNO 1

F2 - Acquisition Parameters  
 Date\_ 20230318  
 Time\_ 1.28 h  
 INSTRUM Avance Neo  
 PROBHD Z140678\_0053 (  
 PULPROG zg30  
 TD 65536  
 SOLVENT CDCl3  
 NS 16  
 DS 2  
 SWH 8196.722 Hz  
 FIDRES 0.250144 Hz  
 AQ 3.9976959 sec  
 RG 36  
 DW 61.000 usec  
 DE 13.54 usec  
 TE 296.0 K  
 D1 1.00000000 sec  
 TD0 1  
 SFO1 400.1424709 MHz  
 NUC1 1H  
 P0 3.33 usec  
 P1 10.00 usec  
 PLW1 22.64200020 W

F2 - Processing parameters  
 SI 65536  
 SF 400.1400291 MHz  
 WDW EM  
 SSB 0  
 LB 0.30 Hz  
 GB 0  
 PC 1.00

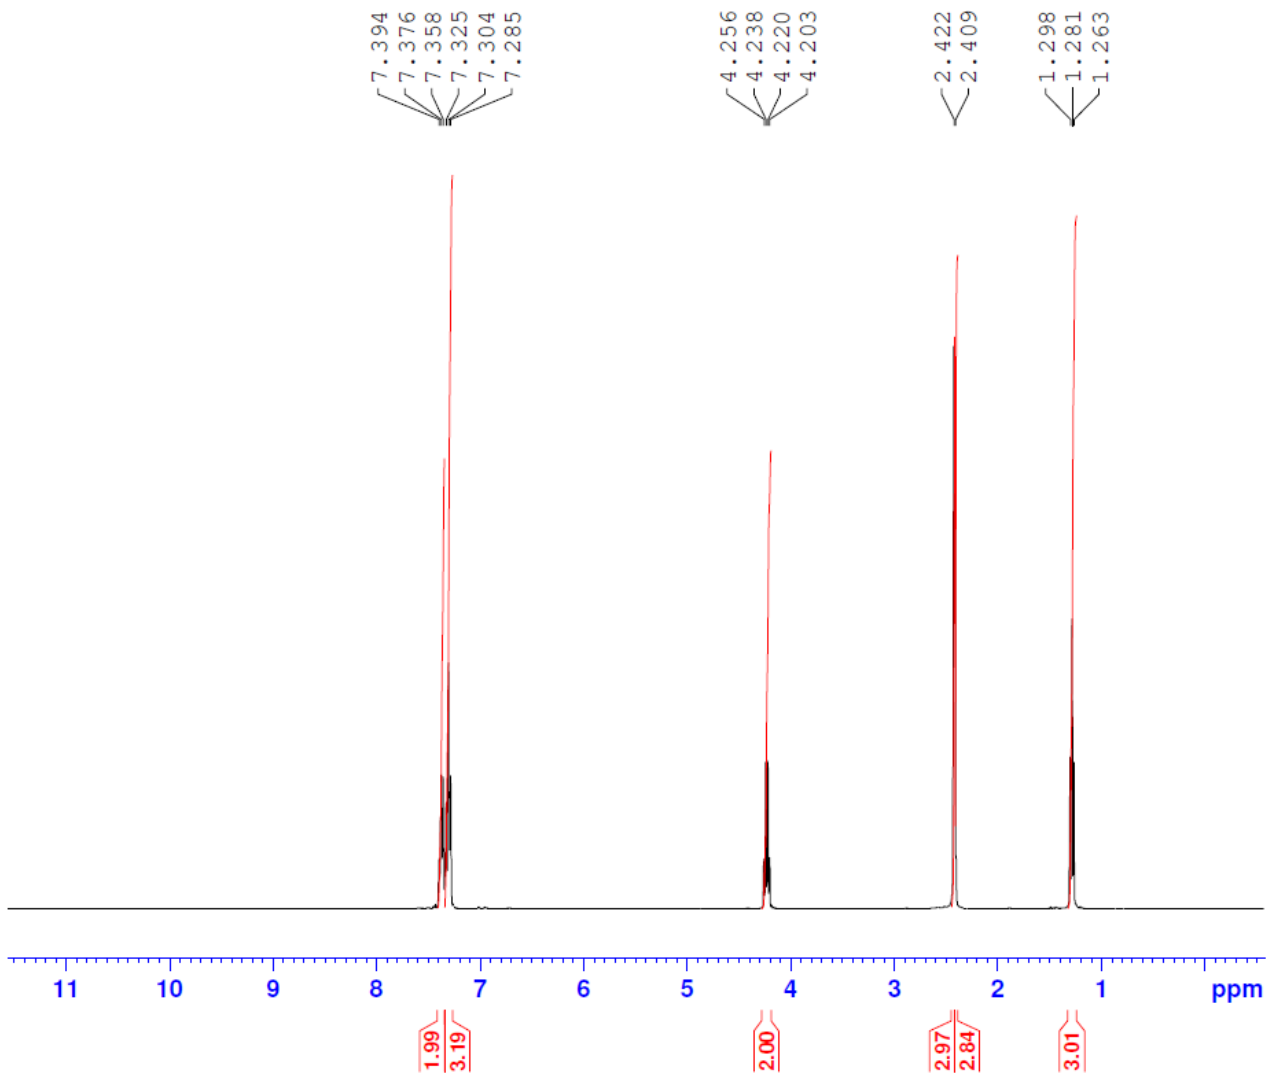

# Ethyl 3,5-dimethyl-1-phenyl-1H-pyrazole-4-carboxylate (P10): <sup>1</sup>H-NMR (CDCl<sub>3</sub>) \_ Expanded Aromatic Region

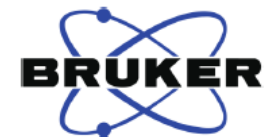

Current Data Parameters  
NAME SM-P10\_1Hand13C  
EXPNO 10  
PROCNO 1

F2 - Acquisition Parameters  
Date\_ 20230318  
Time 1.28 h  
INSTRUM Avance Neo  
PROBHD Z140678\_0053 (   
PULPROG zg30  
TD 65536  
SOLVENT CDCl3  
NS 16  
DS 2  
SWH 8196.722 Hz  
FIDRES 0.250144 Hz  
AQ 3.9976959 sec  
RG 36  
DW 61.000 usec  
DE 13.54 usec  
TE 296.0 K  
D1 1.00000000 sec  
TD0 1  
SFO1 400.1424709 MHz  
NUC1 1H  
P0 3.33 usec  
P1 10.00 usec  
PLW1 22.64200020 W

F2 - Processing parameters  
SI 65536  
SF 400.1400291 MHz  
WDW EM  
SSB 0  
LB 0.30 Hz  
GB 0  
PC 1.00

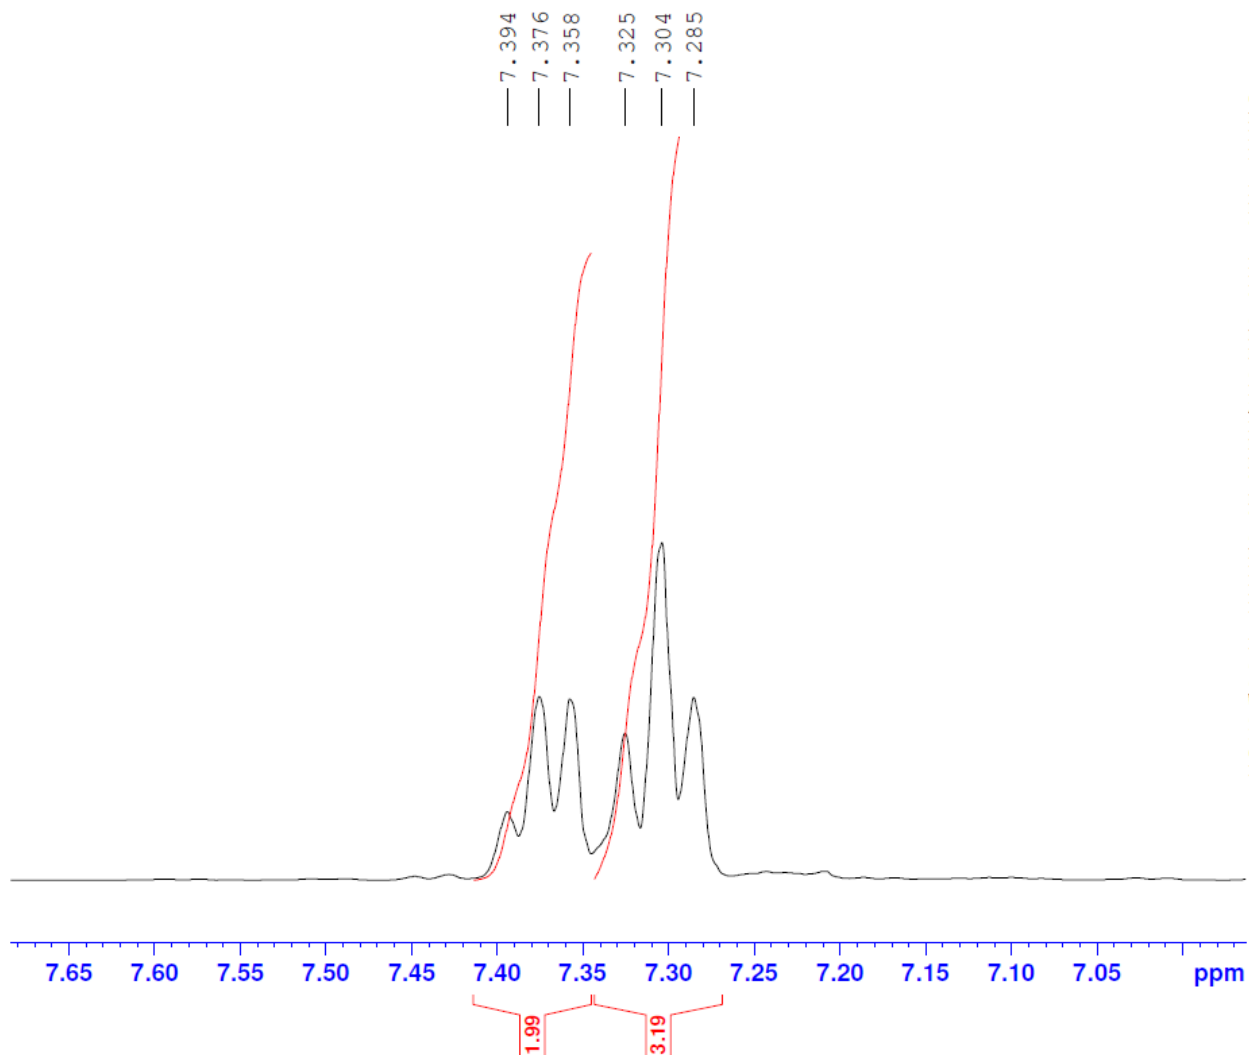

Ethyl 3,5-dimethyl-1-phenyl-1H-pyrazole-4-carboxylate (P10):  $^{13}\text{C}$ -NMR ( $\text{CDCl}_3$ )

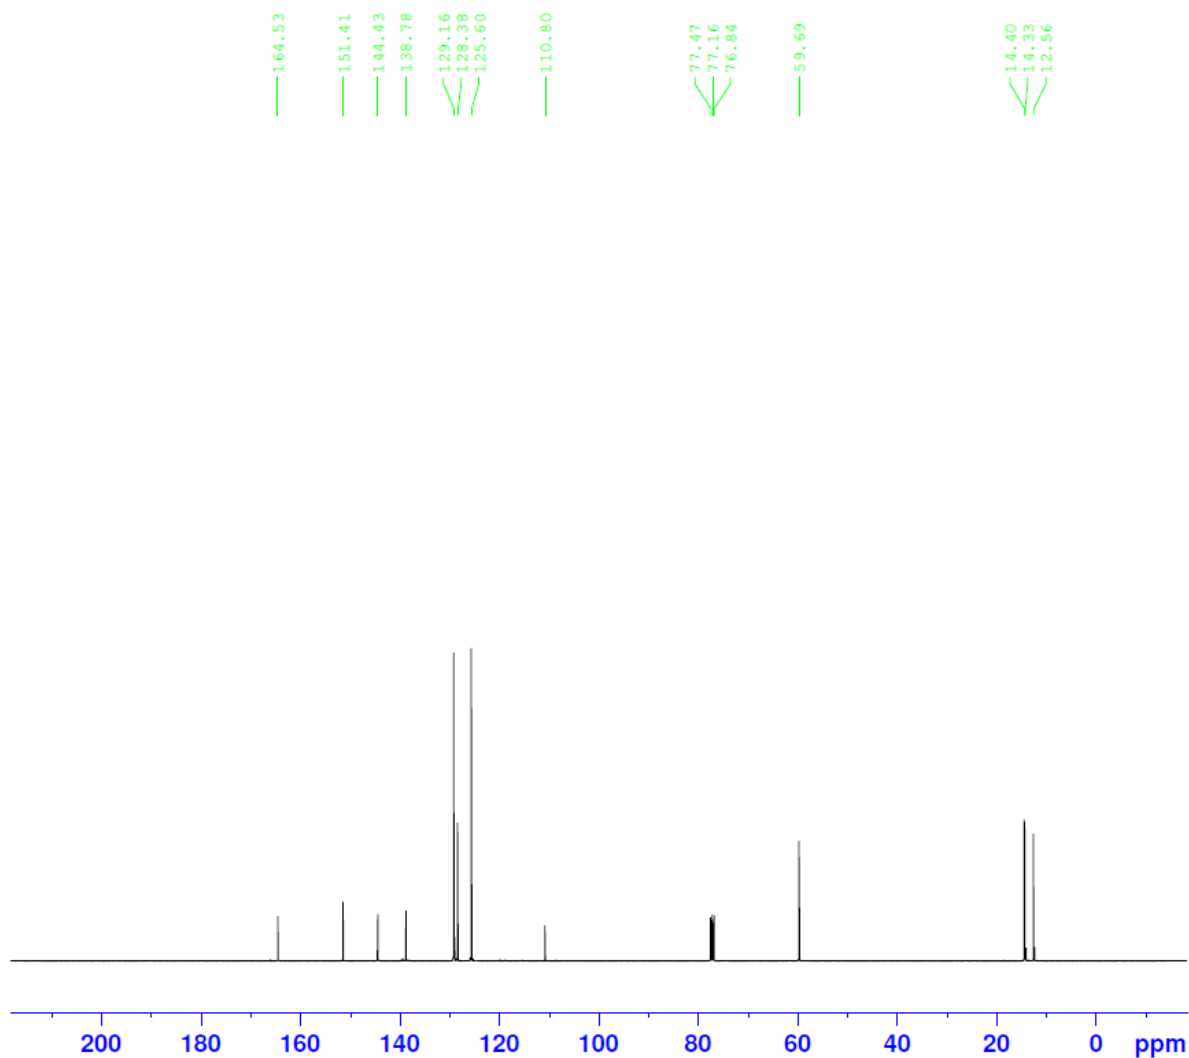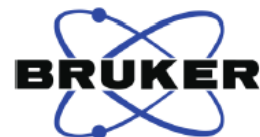

Current Data Parameters  
NAME SM-P10\_1Hand13C  
EXPNO 11  
PROCNO 1

F2 - Acquisition Parameters  
Date\_ 20230318  
Time 5.24 h  
INSTRUM Avance Neo  
PROBHD Z140678\_0053 (  
PULPROG zgpg30  
TD 65536  
SOLVENT  $\text{CDCl}_3$   
NS 4096  
DS 4  
SWH 23809.523 Hz  
FIDRES 0.726609 Hz  
AQ 1.3762560 sec  
RG 12.7  
DW 21.000 usec  
DE 6.50 usec  
TE 296.3 K  
D1 2.00000000 sec  
D11 0.03000000 sec  
TD0 1  
SFO1 100.6253446 MHz  
NUC1  $^{13}\text{C}$   
P0 3.33 usec  
P1 10.00 usec  
PLW1 77.80000305 W  
SFO2 400.1416006 MHz  
NUC2  $^1\text{H}$   
CPDPRG[2] waltz65  
PCPD2 90.00 usec  
PLW2 22.64200020 W  
PLW12 0.27952999 W  
PLW13 0.14060000 W

F2 - Processing parameters  
SI 32768  
SF 100.6152830 MHz  
WDW EM  
SSB 0  
LB 1.00 Hz  
GB 0  
PC 1.40

Ethyl 3,5-dimethyl-1-phenyl-1H-pyrazole-4-carboxylate (P10):  $^{13}\text{C}$ -NMR ( $\text{CDCl}_3$ ) \_ Expanded Aliphatic Region

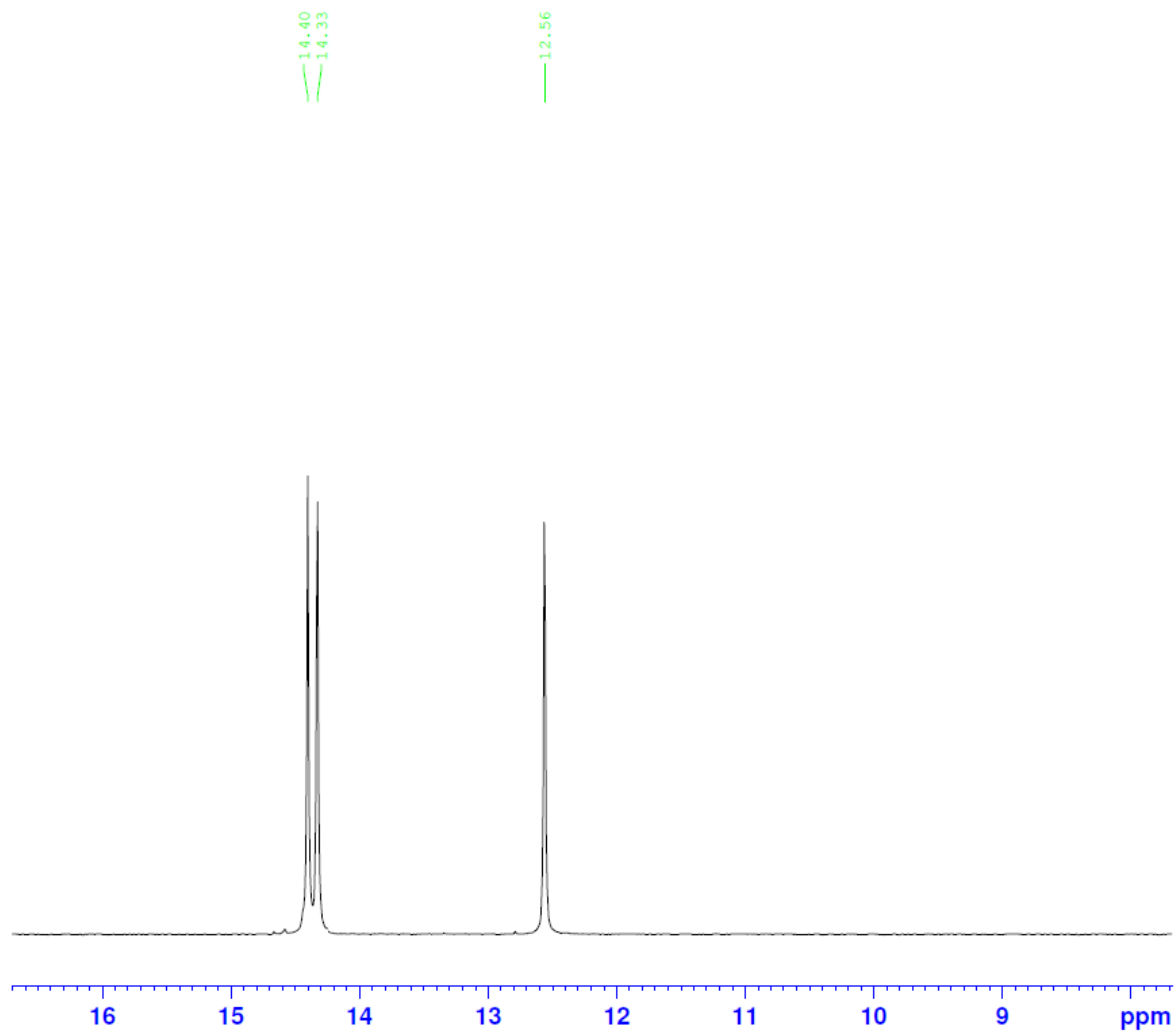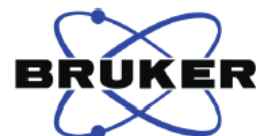

Current Data Parameters  
NAME SM-P10\_1Hand13C  
EXPNO 11  
PROCNO 1

F2 - Acquisition Parameters  
Date\_ 20230318  
Time 5.24 h  
INSTRUM Avance Neo  
PROBHD Z140678\_0053 ( )  
PULPROG zgpg30  
TD 65536  
SOLVENT  $\text{CDCl}_3$   
NS 4096  
DS 4  
SWH 23809.523 Hz  
FIDRES 0.726609 Hz  
AQ 1.3762560 sec  
RG 12.7  
DW 21.000 usec  
DE 6.50 usec  
TE 296.3 K  
D1 2.00000000 sec  
D11 0.03000000 sec  
TD0 1  
SFO1 100.6253446 MHz  
NUC1  $^{13}\text{C}$   
P0 3.33 usec  
P1 10.00 usec  
PLW1 77.80000305 W  
SFO2 400.1416006 MHz  
NUC2  $^1\text{H}$   
CPDPRG[2] waltz65  
PCPD2 90.00 usec  
PLW2 22.64200020 W  
PLW12 0.27952999 W  
PLW13 0.14060000 W

F2 - Processing parameters  
SI 32768  
SF 100.6152830 MHz  
WDW EM  
SSB 0  
LB 1.00 Hz  
GB 0  
PC 1.40

### Ethyl 3,5-dimethyl-1-phenyl-1H-pyrazole-4-carboxylate (P10): ESI-MS

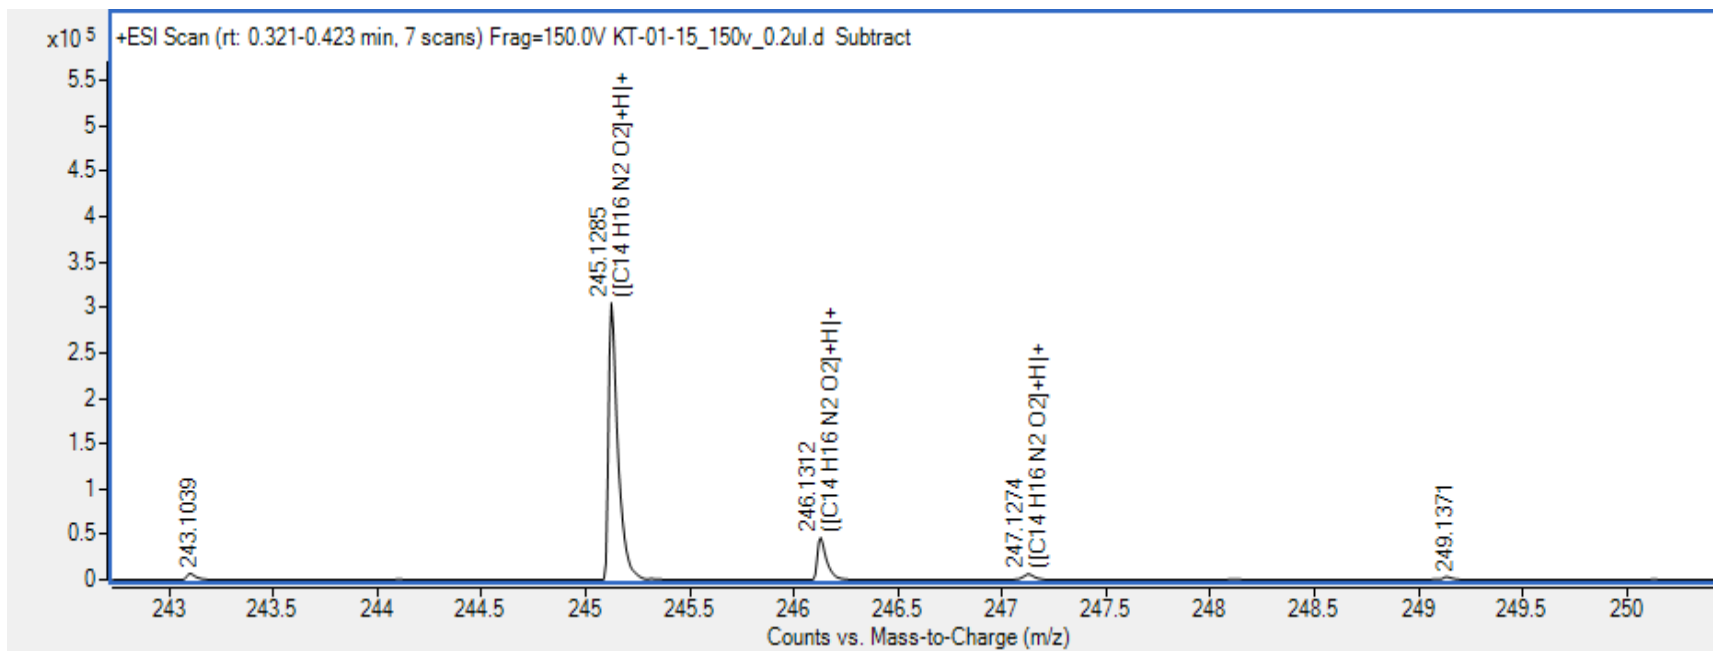

| Formula,                                                        | Species,             | m/z,      | Score, | Diff (abs. ppm), | Mass    |
|-----------------------------------------------------------------|----------------------|-----------|--------|------------------|---------|
| C <sub>14</sub> H <sub>16</sub> N <sub>2</sub> O <sub>2</sub> , | (M+H) <sup>+</sup> , | 245.1285, | 97.86, | 0.62,            | 244.121 |

5-methyl-3-phenylisoxazole (P11): <sup>1</sup>H-NMR (CDCl<sub>3</sub>)

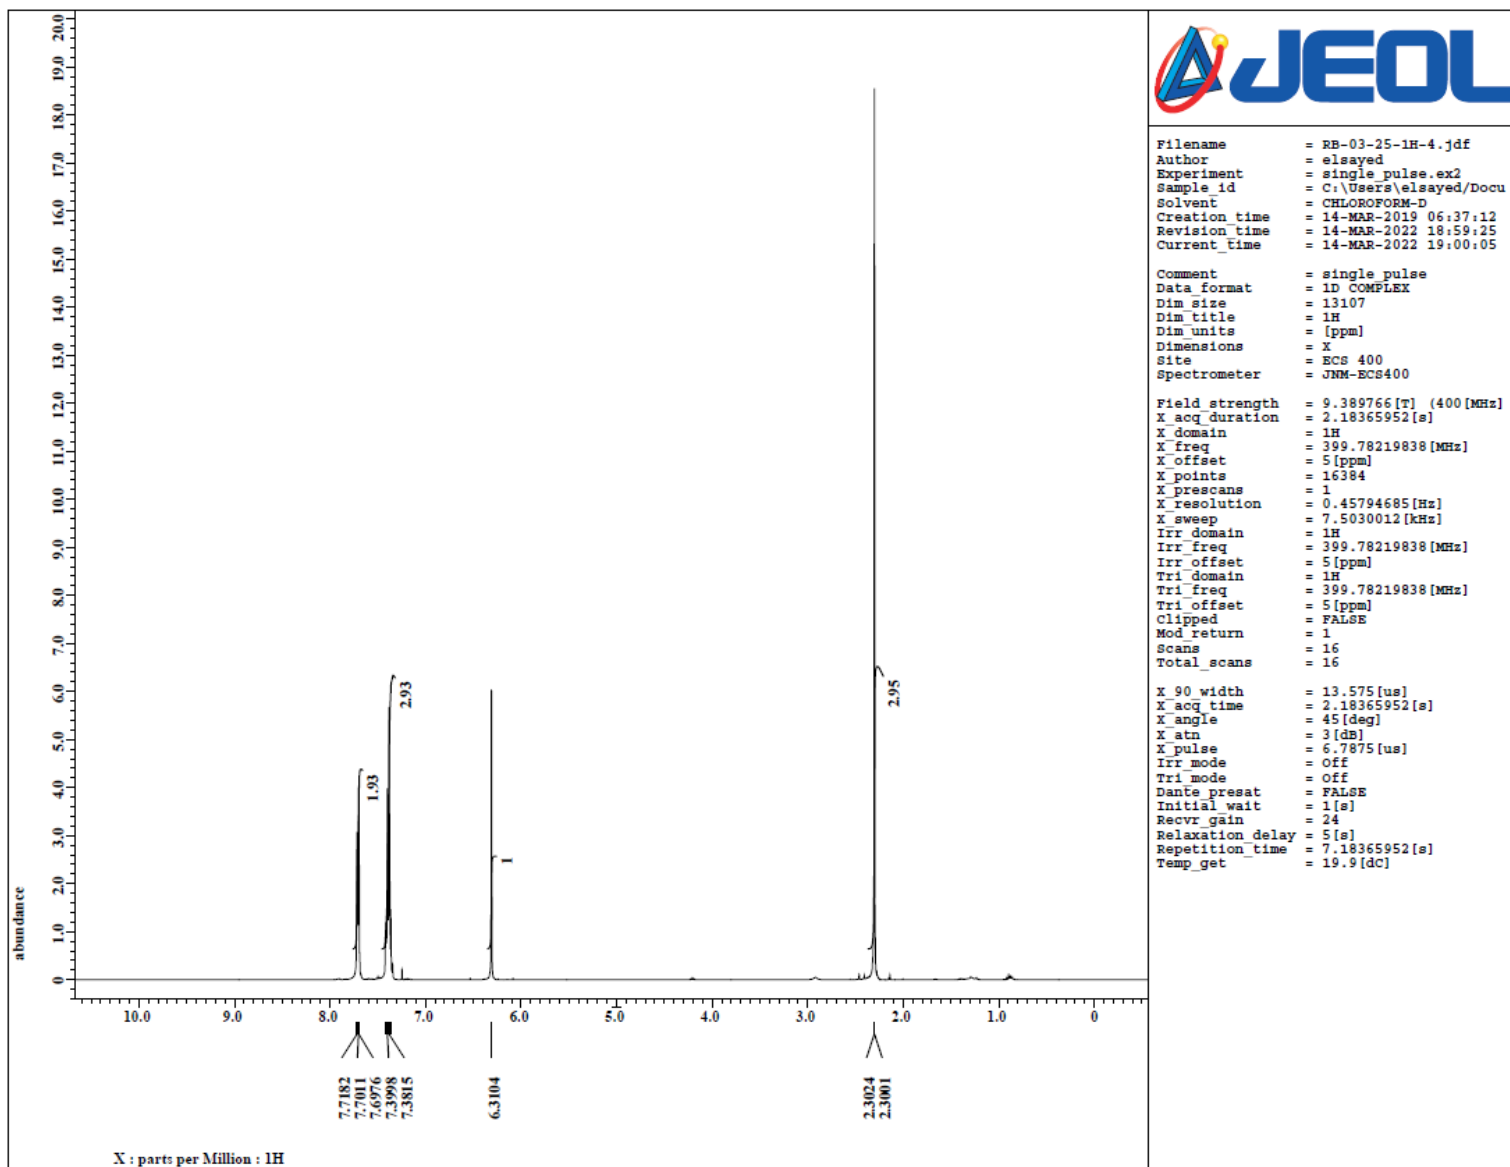

# 5-methyl-3-phenylisoxazole (P11): <sup>1</sup>H-NMR (CDCl<sub>3</sub>) \_ Aromatic Region Expanded

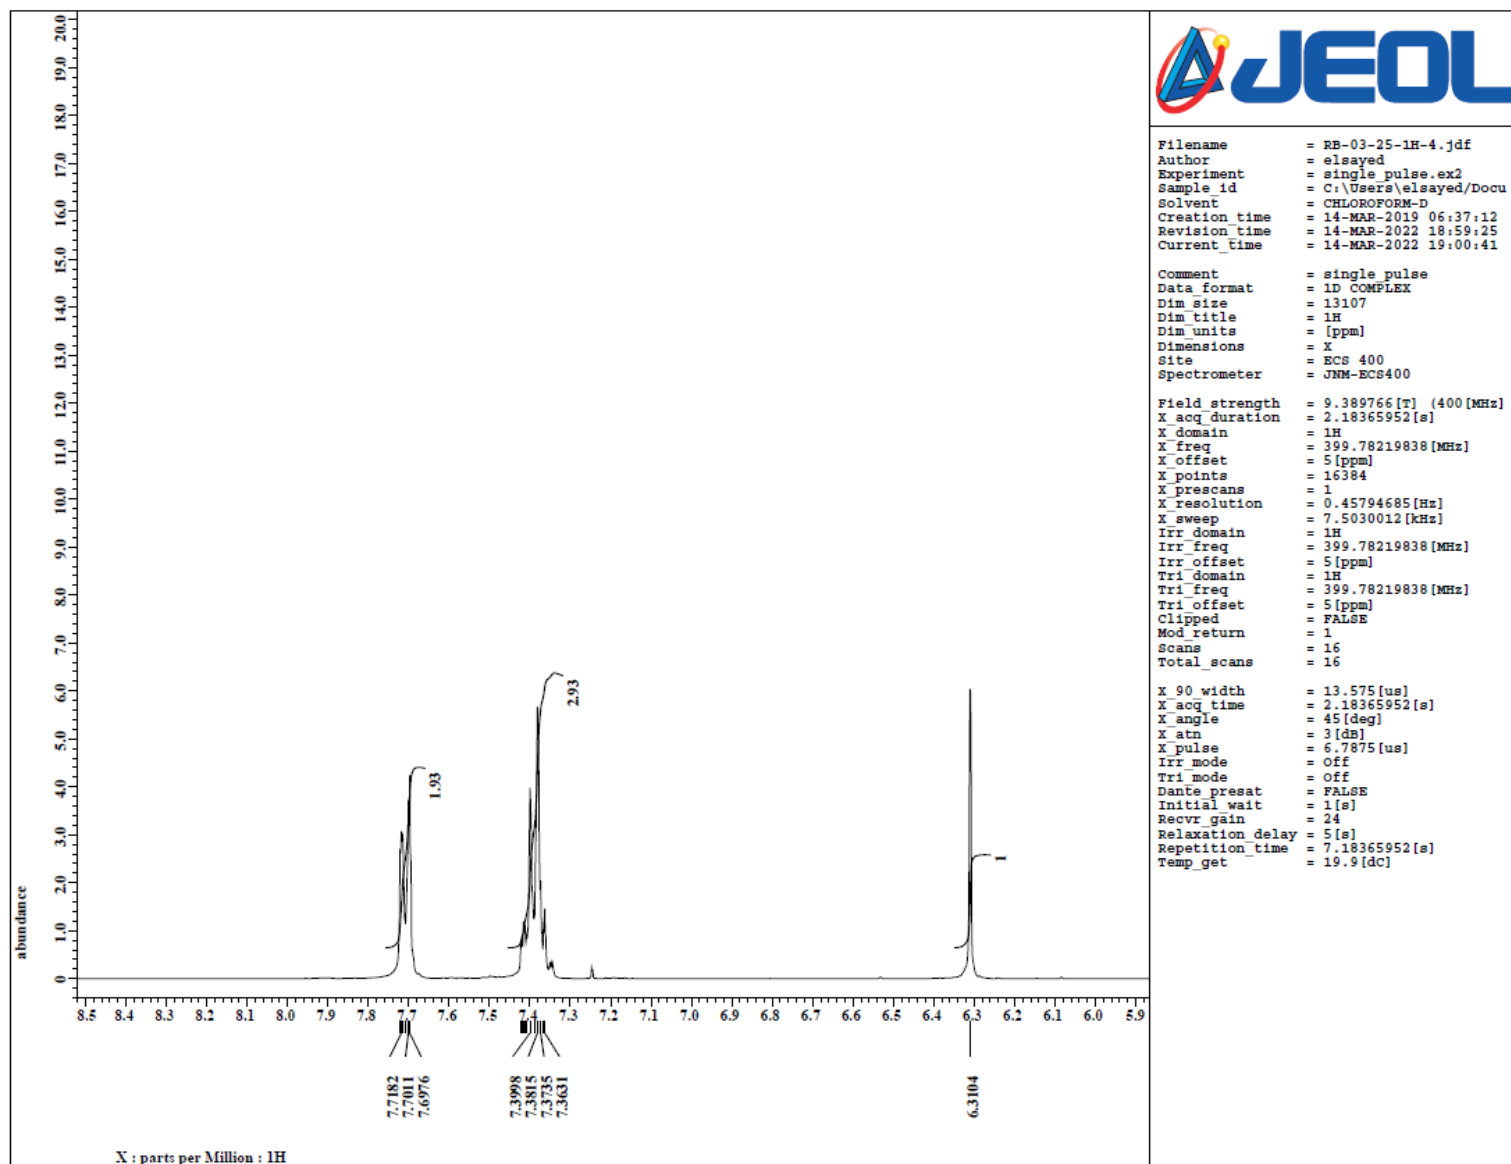



5-methyl-3-phenylisoxazole (P11):  $^{13}\text{C}$ -NMR ( $\text{CDCl}_3$ )

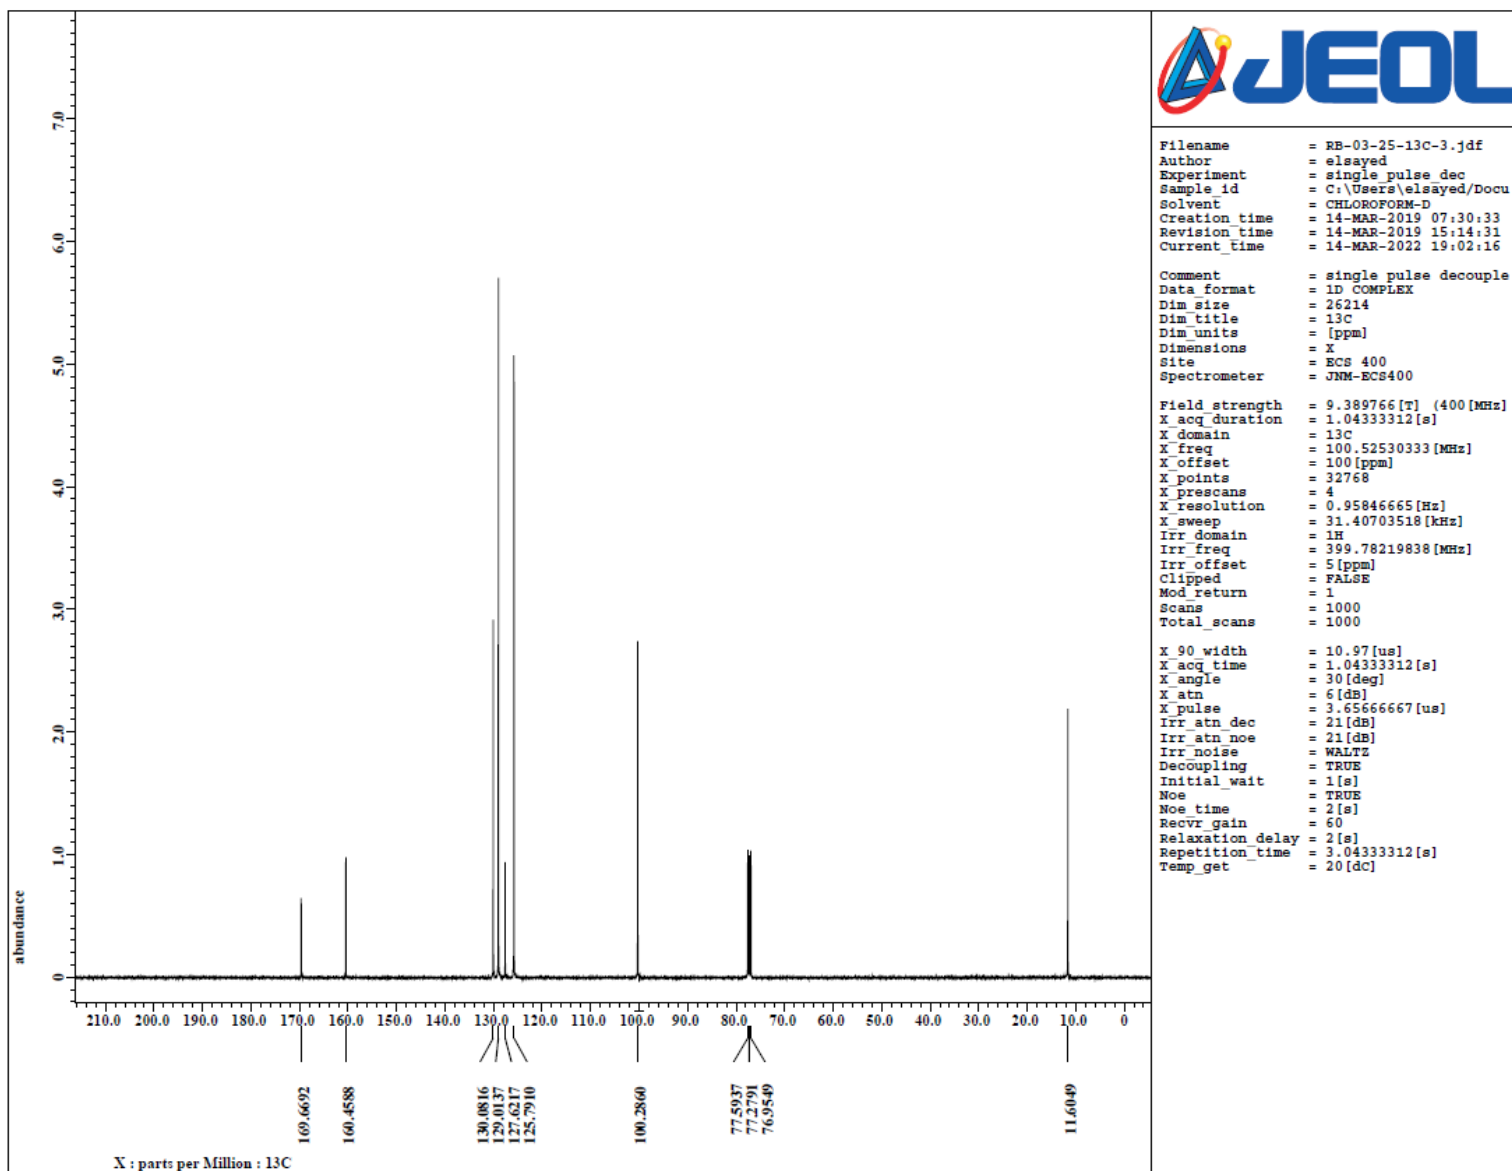

### 5-methyl-3-phenylisoxazole (P11): ESI-MS

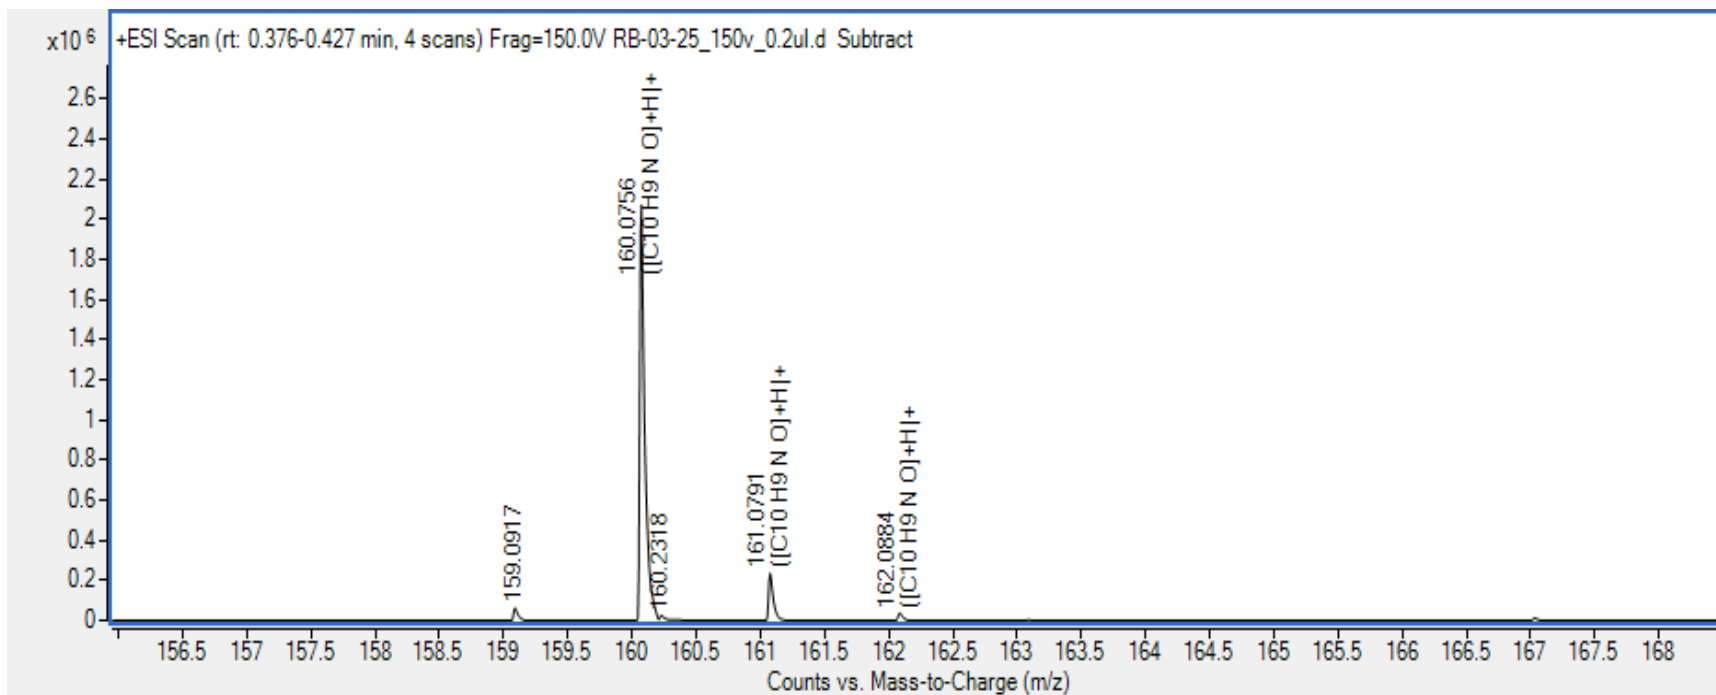

| Formula                            | Species            | m/z      | Score | Diff (abs. ppm) | Mass     |
|------------------------------------|--------------------|----------|-------|-----------------|----------|
| C <sub>10</sub> H <sub>9</sub> N O | (M+H) <sup>+</sup> | 160.0756 | 97.86 | 0.38            | 159.0685 |

3-methyl-4,5-dihydronaphtho[1,2-c]isoxazole (P12): <sup>1</sup>H-NMR (CDCl<sub>3</sub>)

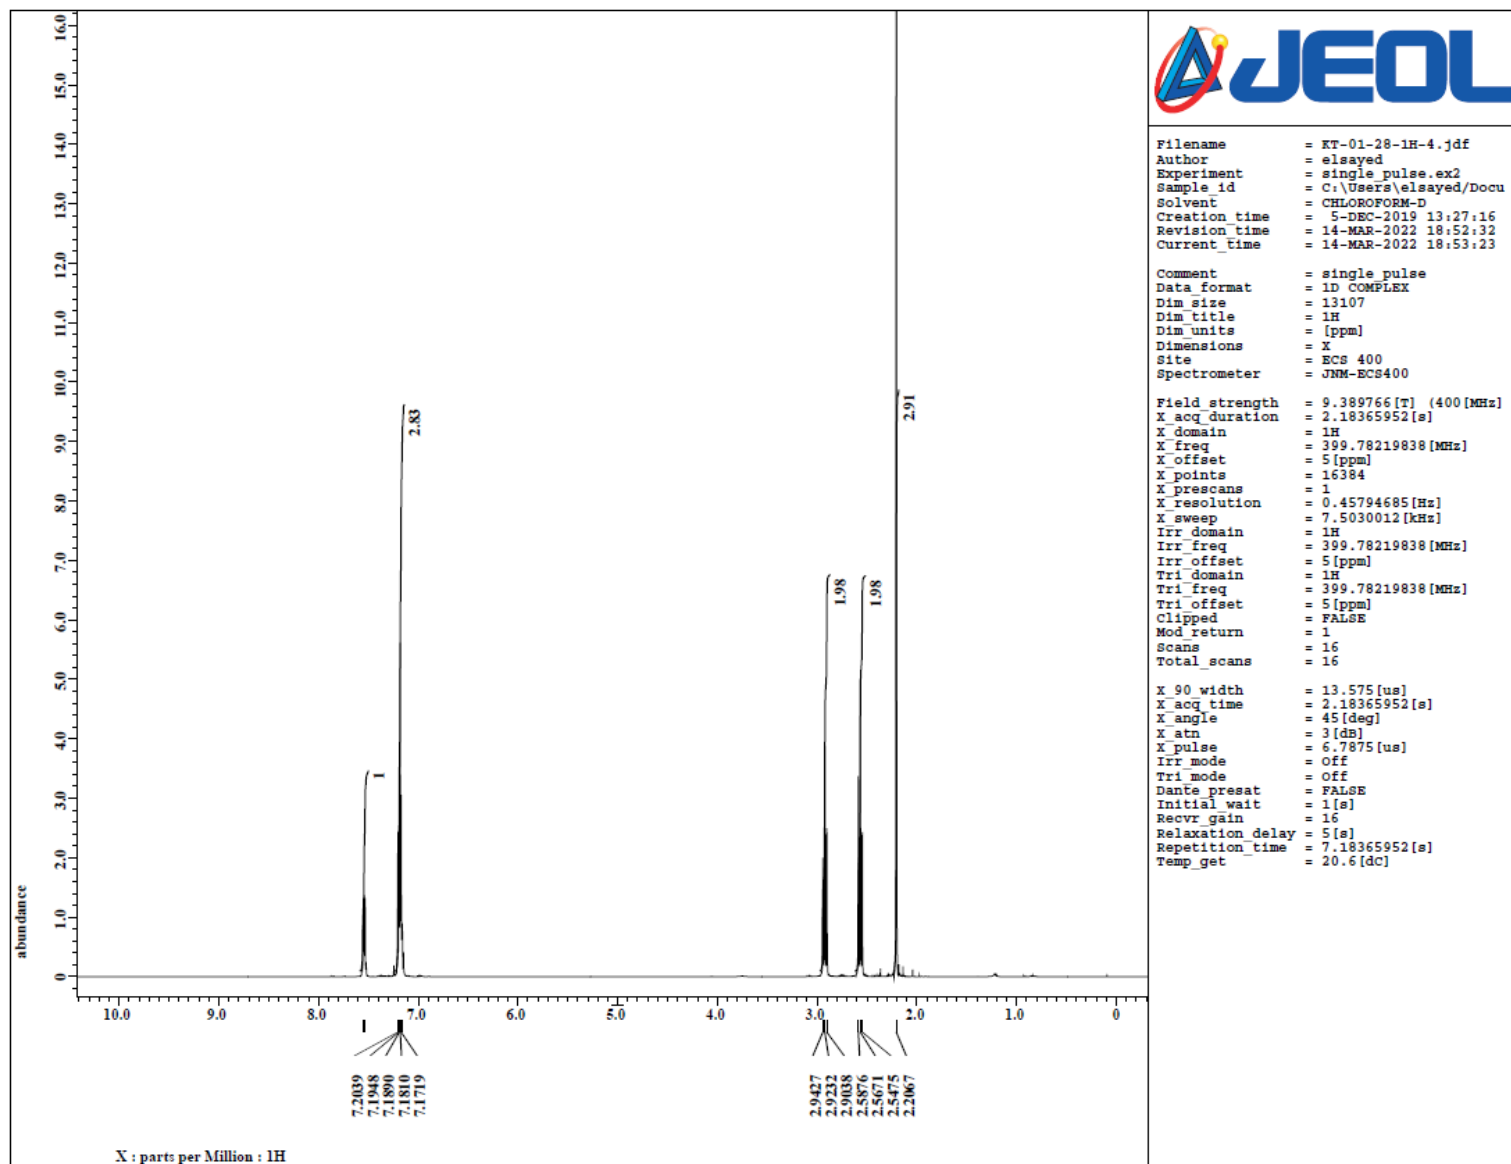

### 3-methyl-4,5-dihydronaphtho[1,2-c]isoxazole (P12): <sup>1</sup>H-NMR (CDCl<sub>3</sub>) \_ Expanded Aromatic Region

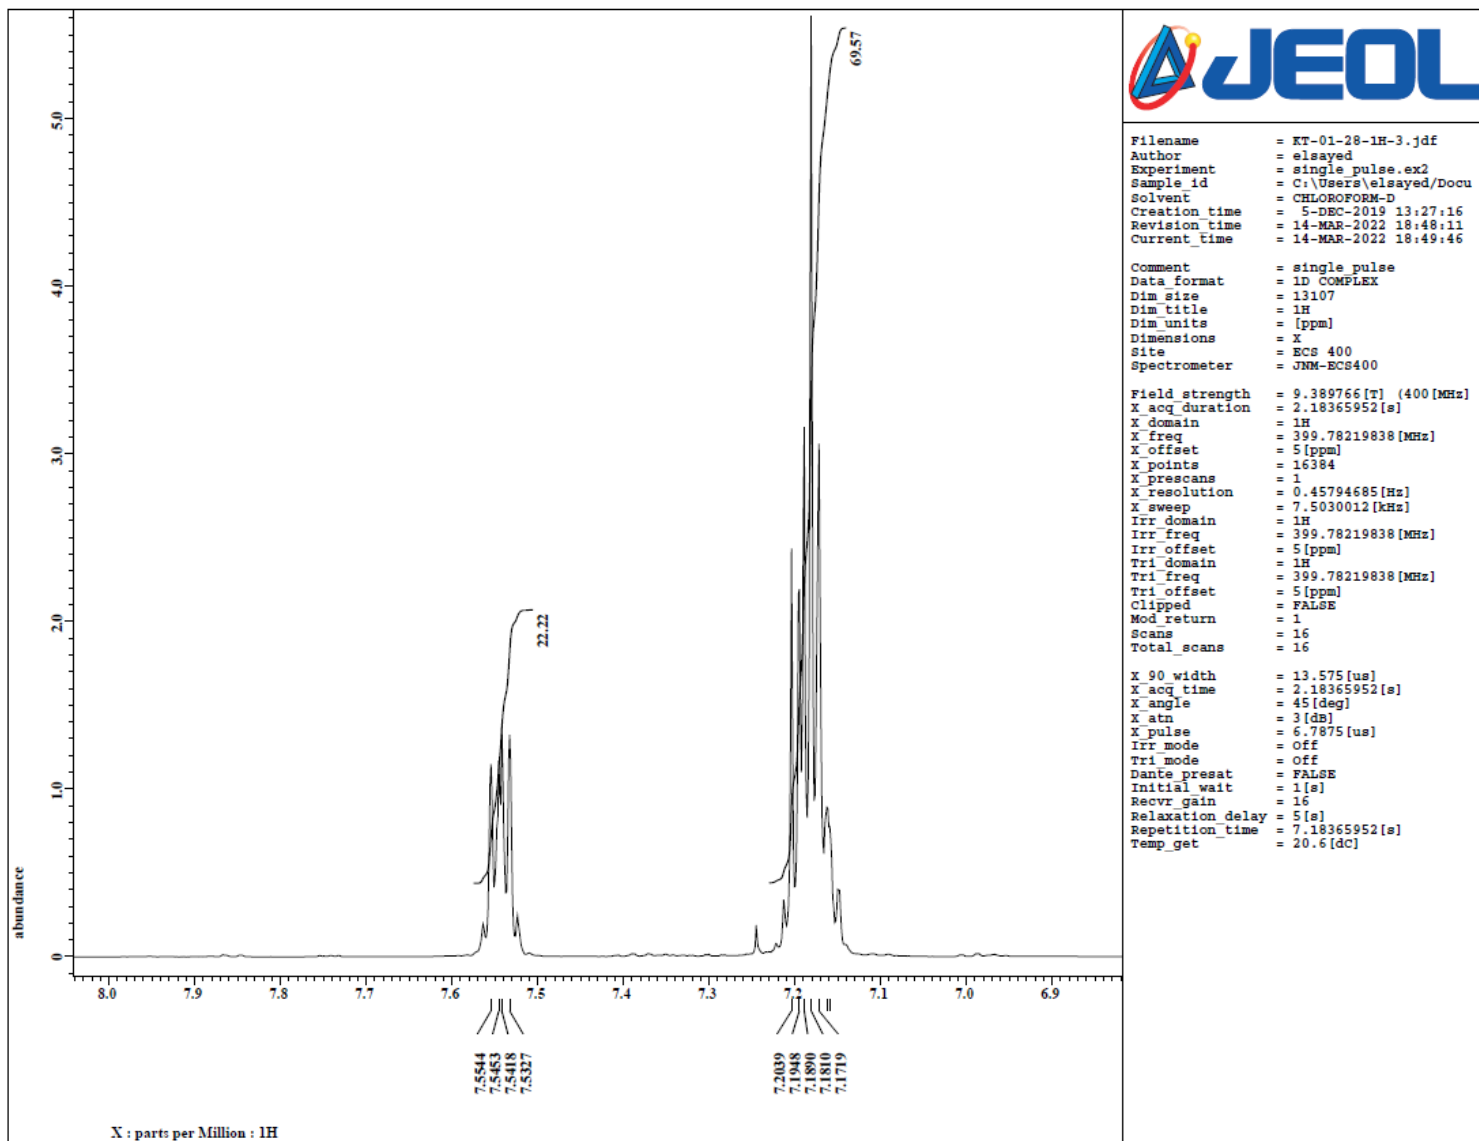

3-methyl-4,5-dihydronaphtho[1,2-c]isoxazole (P12):  $^{13}\text{C}$ -NMR ( $\text{CDCl}_3$ )

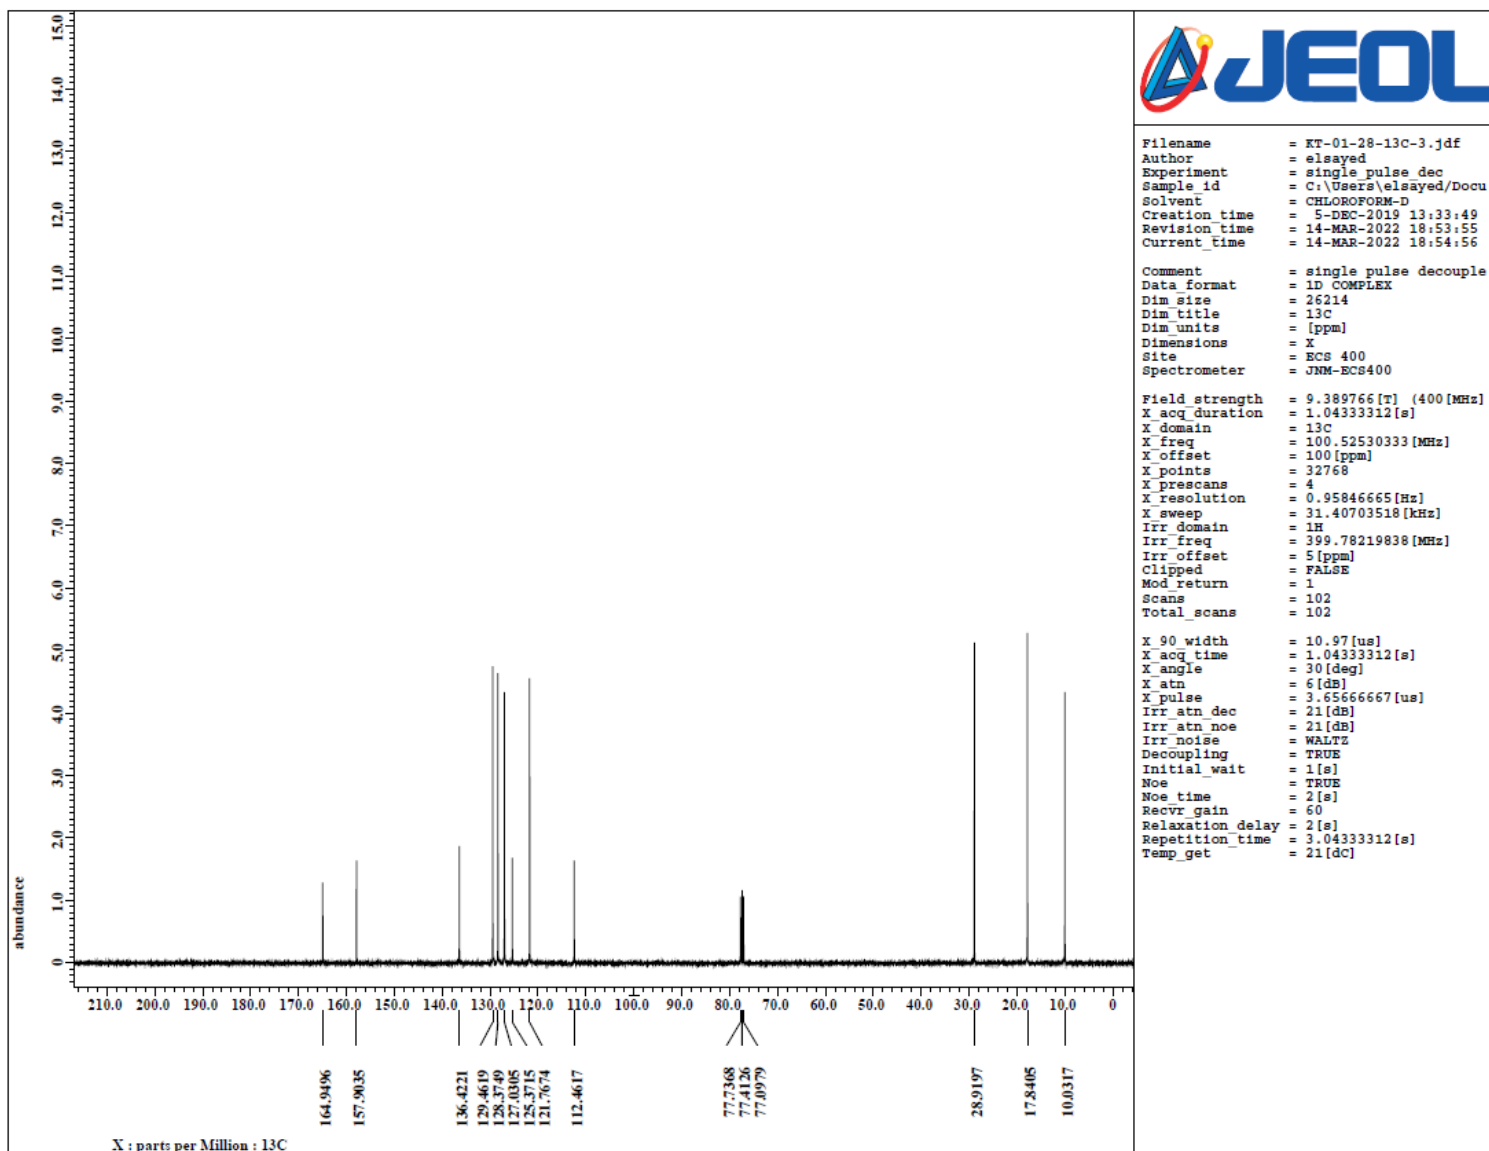

### 3-methyl-4,5-dihydronaphtho[1,2-c]isoxazole (P12): ESI-MS

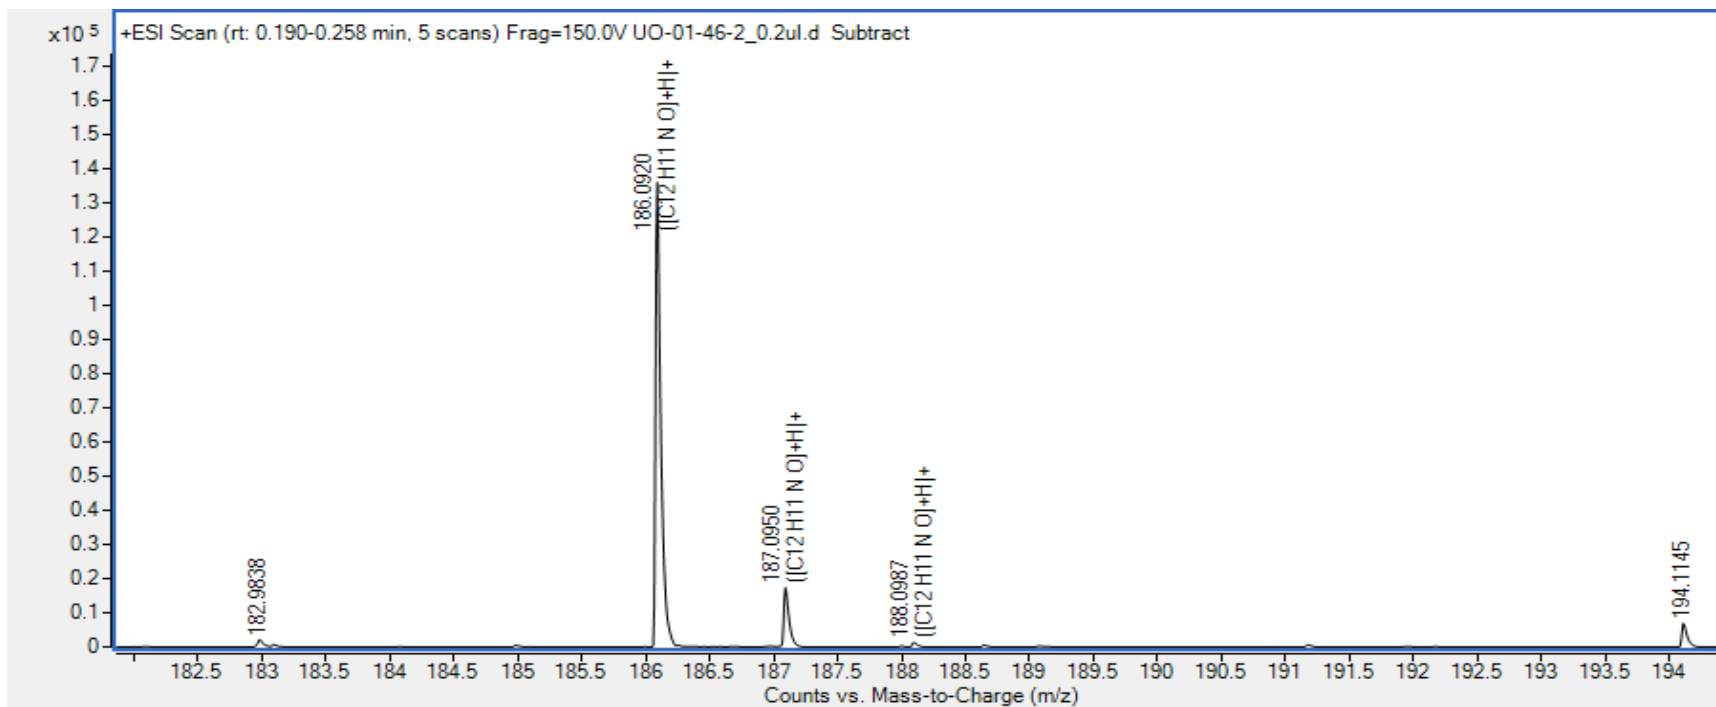

| Formula,     | Species, | m/z,      | Diff (abs. ppm), | Score, | Mass     |
|--------------|----------|-----------|------------------|--------|----------|
| C12 H11 N O, | (M+H)+,  | 186.0920, | 3.59,            | 97.51, | 185.0847 |

# 1,3,5-triphenyl-1H-pyrazole (P13): <sup>1</sup>H-NMR (CDCl<sub>3</sub>)

<sup>1</sup>H of P13

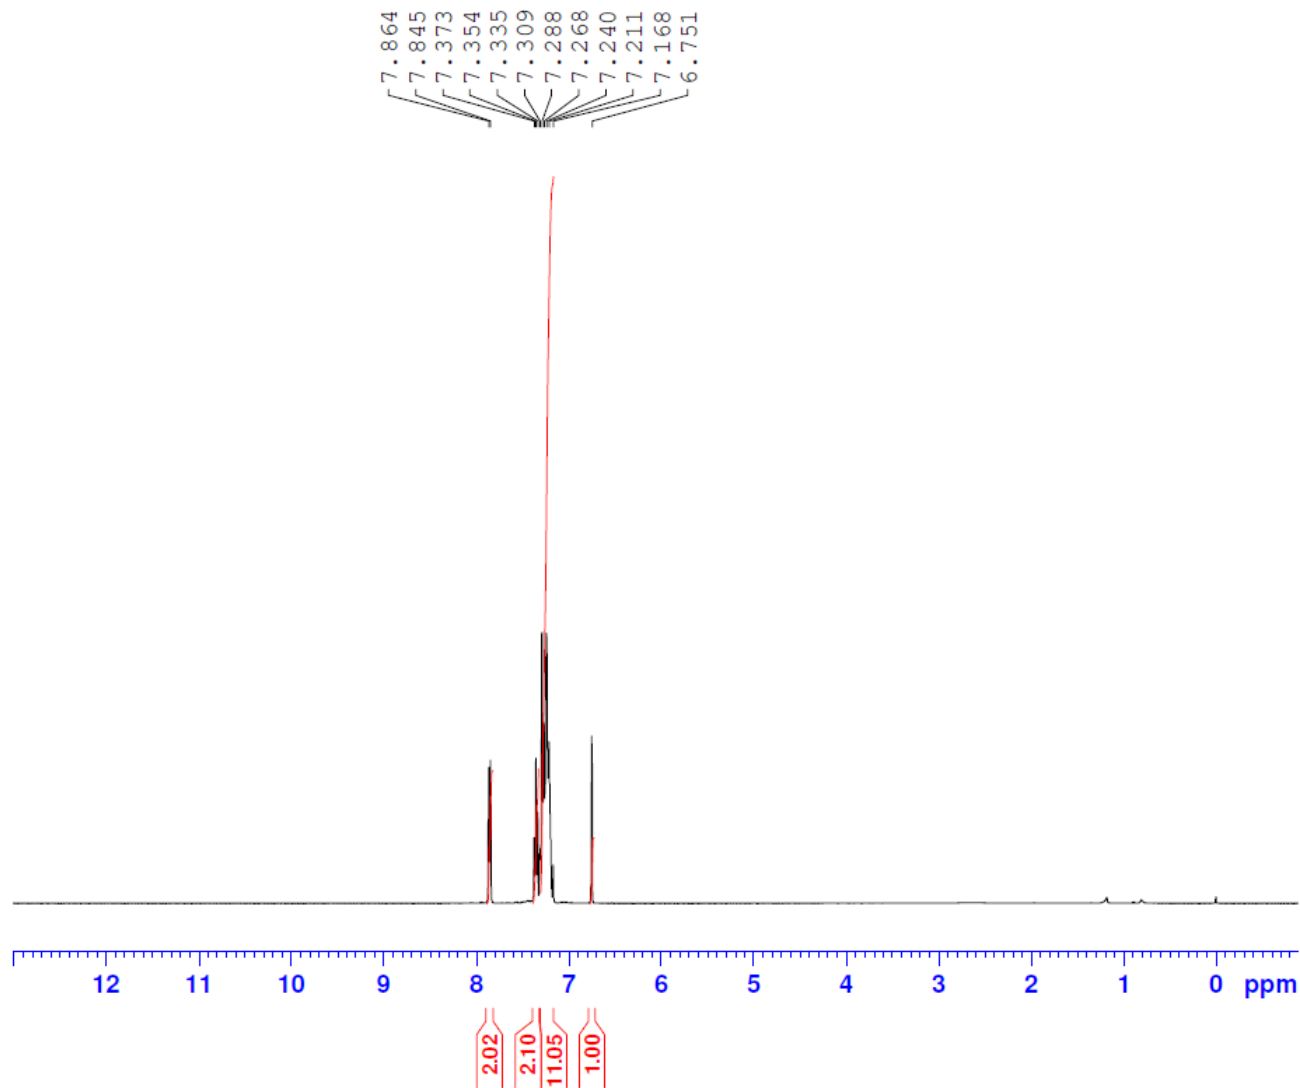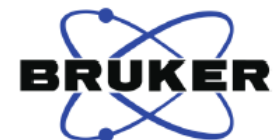

Current Data Parameters  
NAME SM\_Mar21\_13\_1H  
EXPNO 10  
PROCNO 1

F2 - Acquisition Parameters  
Date\_ 20230321  
Time 19.49 h  
INSTRUM Avance Neo  
PROBHD z140678\_0053 (  
PULPROG zg30  
TD 65536  
SOLVENT CDCl3  
NS 16  
DS 2  
SWH 8196.722 Hz  
FIDRES 0.250144 Hz  
AQ 3.9976959 sec  
RG 101  
DW 61.000 usec  
DE 13.54 usec  
TE 296.4 K  
D1 1.00000000 sec  
TD0 1  
SFO1 400.1424709 MHz  
NUC1 1H  
P0 3.33 usec  
P1 10.00 usec  
PLW1 22.64200020 W

F2 - Processing parameters  
SI 65536  
SF 400.1400465 MHz  
WDW EM  
SSB 0  
LB 0.30 Hz  
GB 0  
PC 1.00

# 1,3,5-triphenyl-1H-pyrazole (P13): <sup>1</sup>H-NMR (CDCl<sub>3</sub>) \_ Expanded Aromatic Region

<sup>1</sup>H of P13

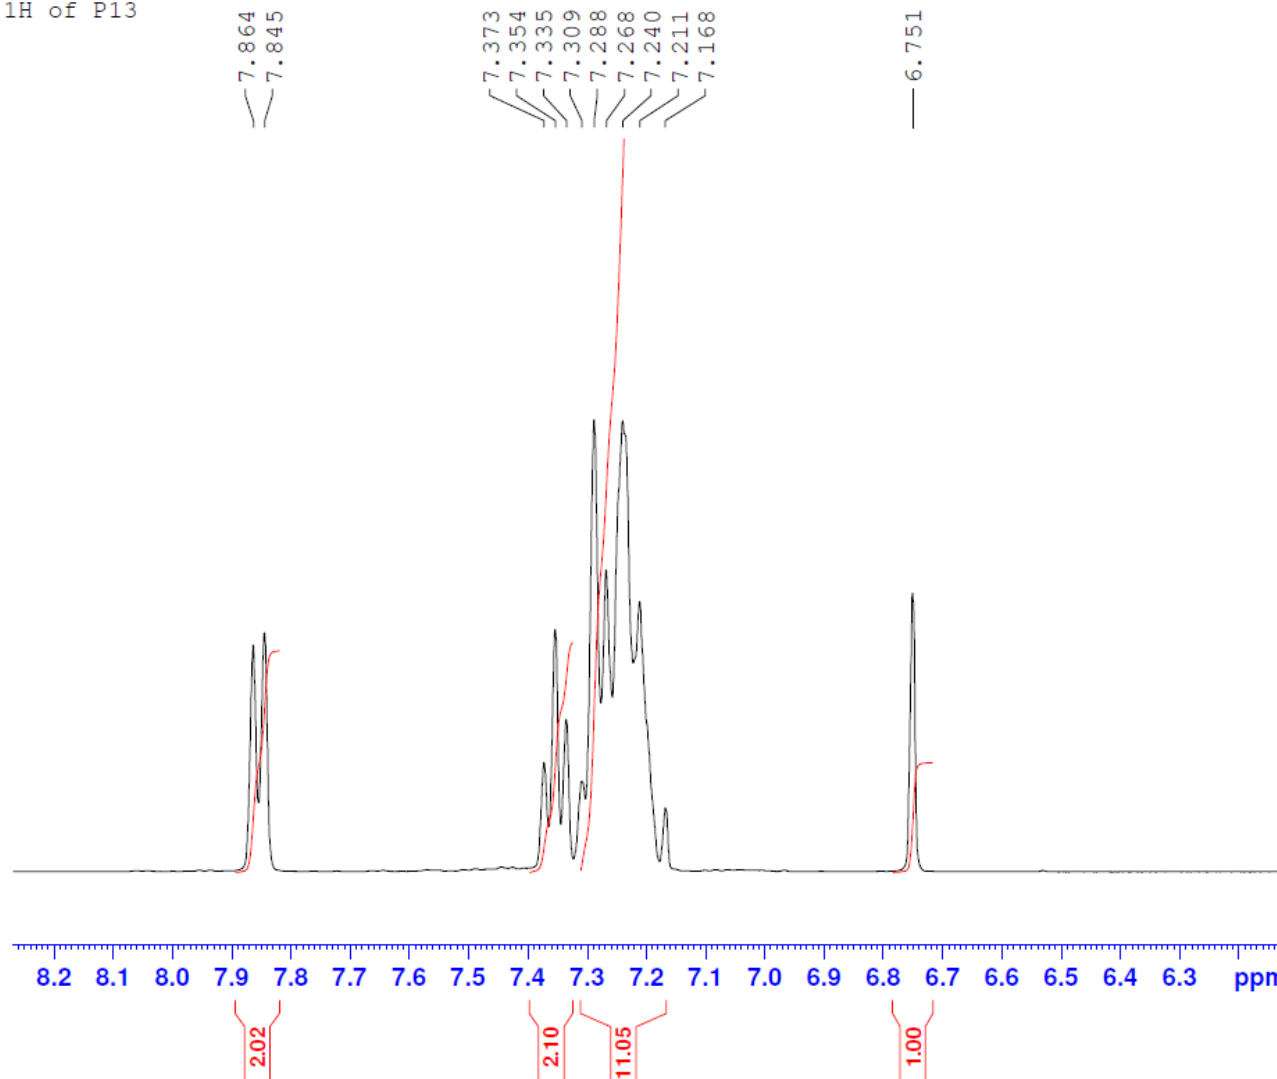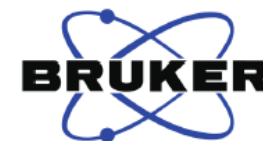

Current Data Parameters  
NAME SM\_Mar21\_13\_1H  
EXPNO 10  
PROCNO 1

F2 - Acquisition Parameters  
Date\_ 20230321  
Time 19.49 h  
INSTRUM Avance Neo  
PROBHD z140678\_0053 (zg30)  
PULPROG zg30  
TD 65536  
SOLVENT CDCl3  
NS 16  
DS 2  
SWH 8196.722 Hz  
FIDRES 0.250144 Hz  
AQ 3.9976959 sec  
RG 101  
DW 61.000 usec  
DE 13.54 usec  
TE 296.4 K  
D1 1.00000000 sec  
TD0 1  
SFO1 400.1424709 MHz  
NUC1 1H  
PO 3.33 usec  
P1 10.00 usec  
PLW1 22.64200020 W

F2 - Processing parameters  
SI 65536  
SF 400.1400465 MHz  
WDW EM  
SSB 0  
LB 0.30 Hz  
GB 0  
PC 1.00



1,3,5-triphenyl-1H-pyrazole (P13):  $^{13}\text{C}$ -NMR ( $\text{CDCl}_3$ )

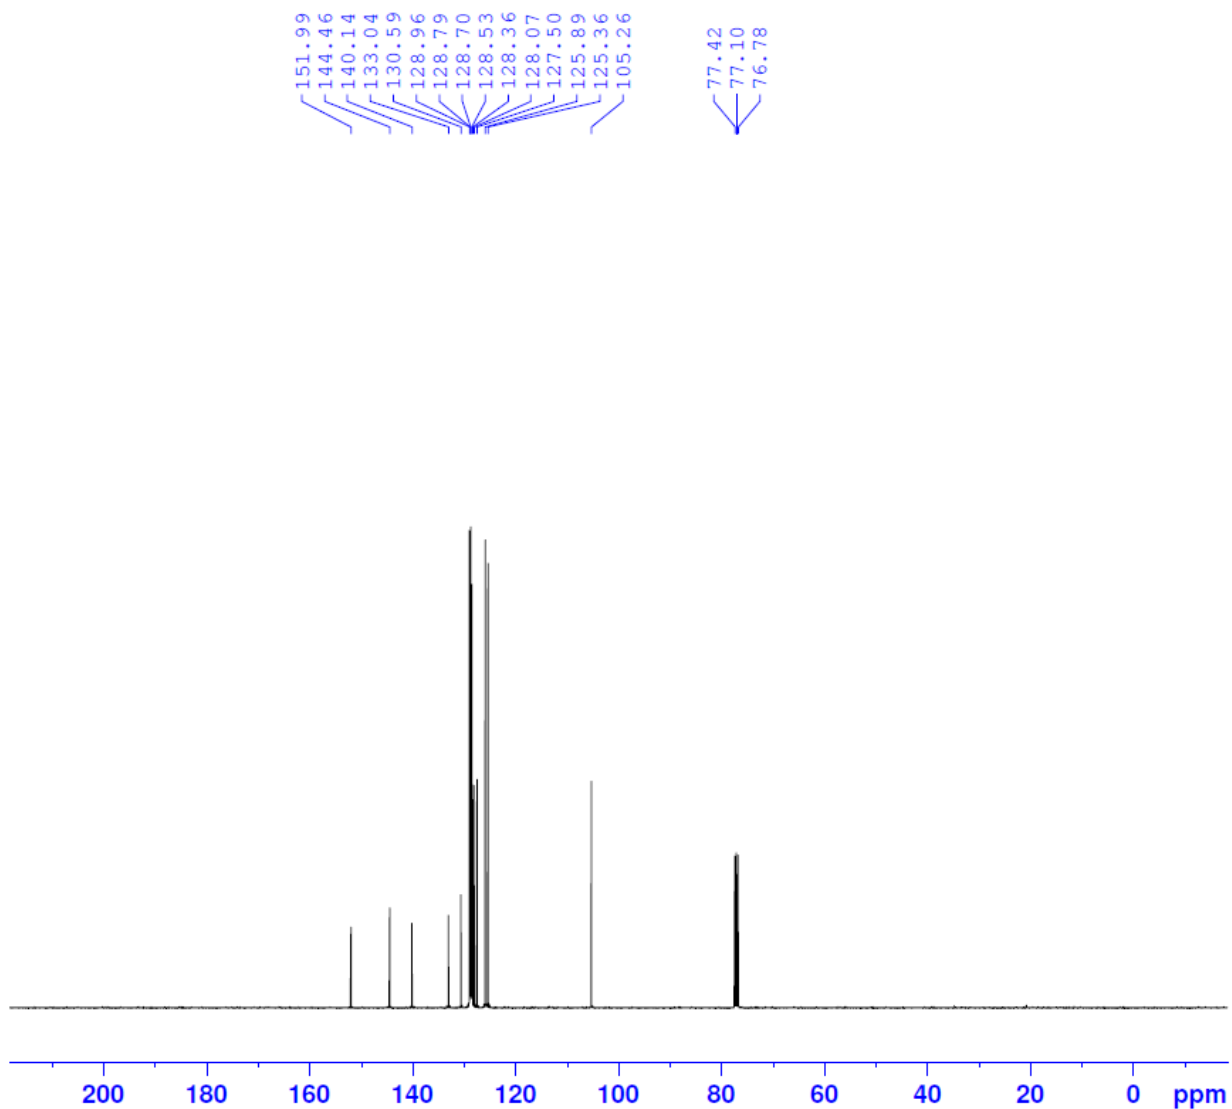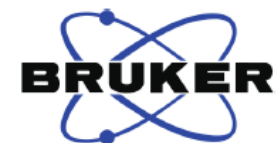

Current Data Parameters  
 NAME SM\_Mar21\_P131Hand13C  
 EXPNO 11  
 PROCNO 1

F2 - Acquisition Parameters  
 Date\_ 20230321  
 Time 19.42 h  
 INSTRUM Avance Neo  
 PROBHD Z140678\_0053 (  
 PULPROG zgpg30  
 TD 65536  
 SOLVENT CDCl3  
 NS 4096  
 DS 4  
 SWH 23809.523 Hz  
 FIDRES 0.726609 Hz  
 AQ 1.3762560 sec  
 RG 12.7  
 DW 21.000 usec  
 DE 6.50 usec  
 TE 296.9 K  
 D1 2.00000000 sec  
 D11 0.03000000 sec  
 TD0 1  
 SF01 100.6253446 MHz  
 NUC1 13C  
 P0 3.33 usec  
 P1 10.00 usec  
 PLW1 77.80000305 W  
 SFO2 400.1416006 MHz  
 NUC2 1H  
 CPDPRG[2] waltz65  
 PCPD2 90.00 usec  
 PLW2 22.64200020 W  
 PLW12 0.27952999 W  
 PLW13 0.14060000 W

F2 - Processing parameters  
 SI 32768  
 SF 100.6152830 MHz  
 WDW EM  
 SSB 0  
 LB 1.00 Hz  
 GB 0  
 PC 1.40

# 1,3,5-triphenyl-1H-pyrazole (P13): <sup>13</sup>C-NMR (CDCl<sub>3</sub>) \_ Expanded Aromatic Region

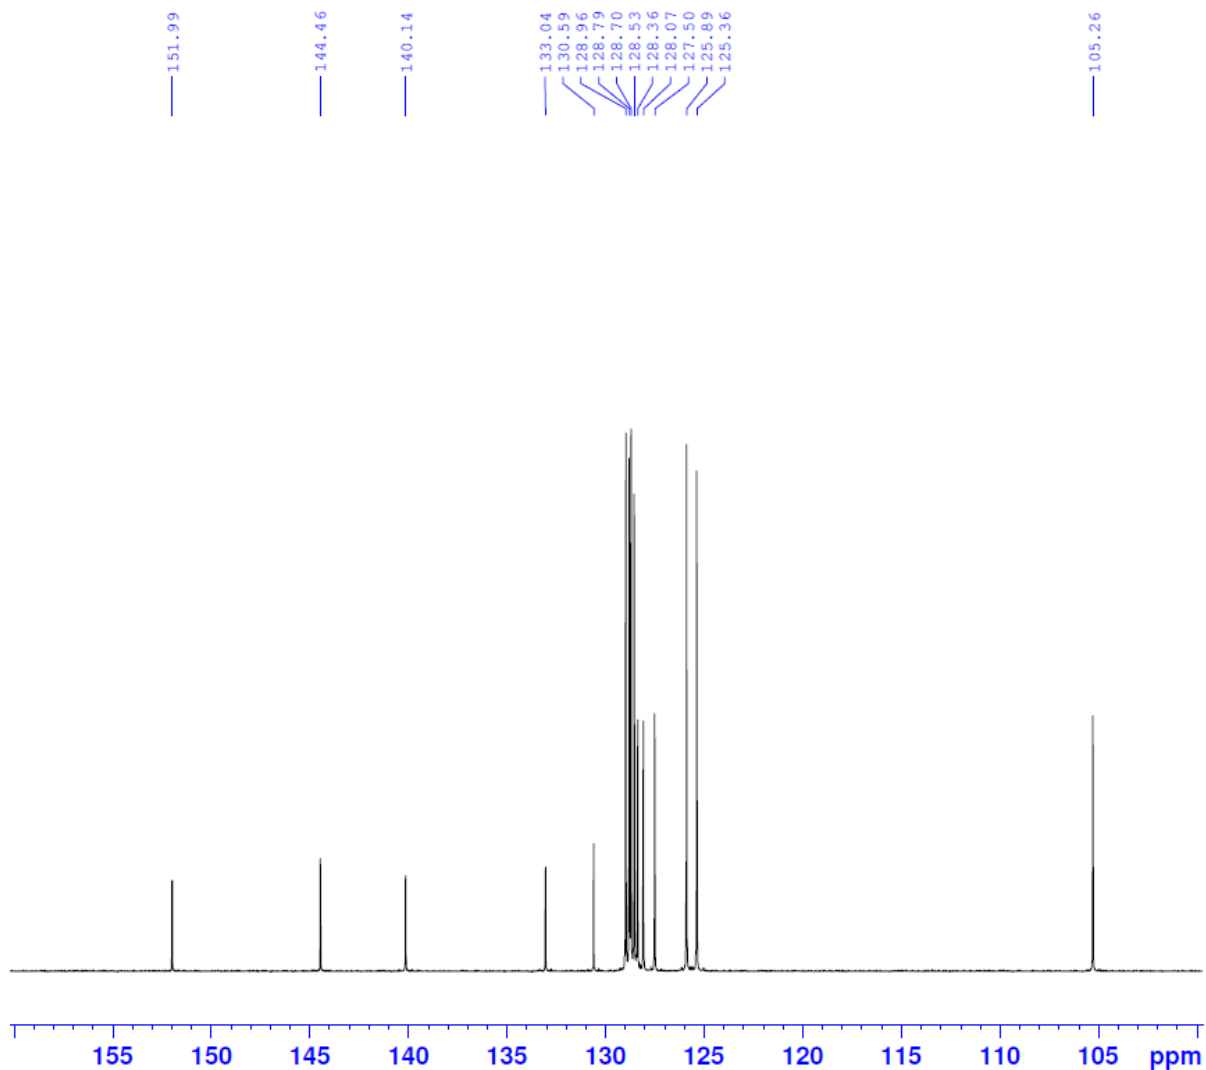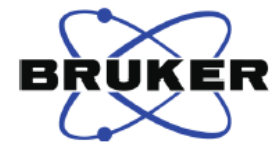

Current Data Parameters  
NAME SM\_Mar21\_P131Hand13C  
EXPNO 11  
PROCNO 1

F2 - Acquisition Parameters  
Date\_ 20230321  
Time 19.42 h  
INSTRUM Avance Neo  
PROBHD Z140678\_0053 (  
PULPROG zgpg30  
TD 65536  
SOLVENT CDCl3  
NS 4096  
DS 4  
SWH 23809.523 Hz  
FIDRES 0.726609 Hz  
AQ 1.3762560 sec  
RG 12.7  
DW 21.000 usec  
DE 6.50 usec  
TE 296.9 K  
D1 2.0000000 sec  
D11 0.0300000 sec  
TD0 1  
SFO1 100.6253446 MHz  
NUC1 13C  
P0 3.33 usec  
P1 10.00 usec  
PLW1 77.80000305 W  
SFO2 400.1416006 MHz  
NUC2 1H  
CPDPRG[2] waltz65  
PCPD2 90.00 usec  
PLW2 22.64200020 W  
PLW12 0.27952999 W  
PLW13 0.14060000 W

F2 - Processing parameters  
SI 32768  
SF 100.6152830 MHz  
WDW EM  
SSB 0  
LB 1.00 Hz  
GB 0  
PC 1.40

1,3,5-triphenyl-1H-pyrazole (P13): GC-MS

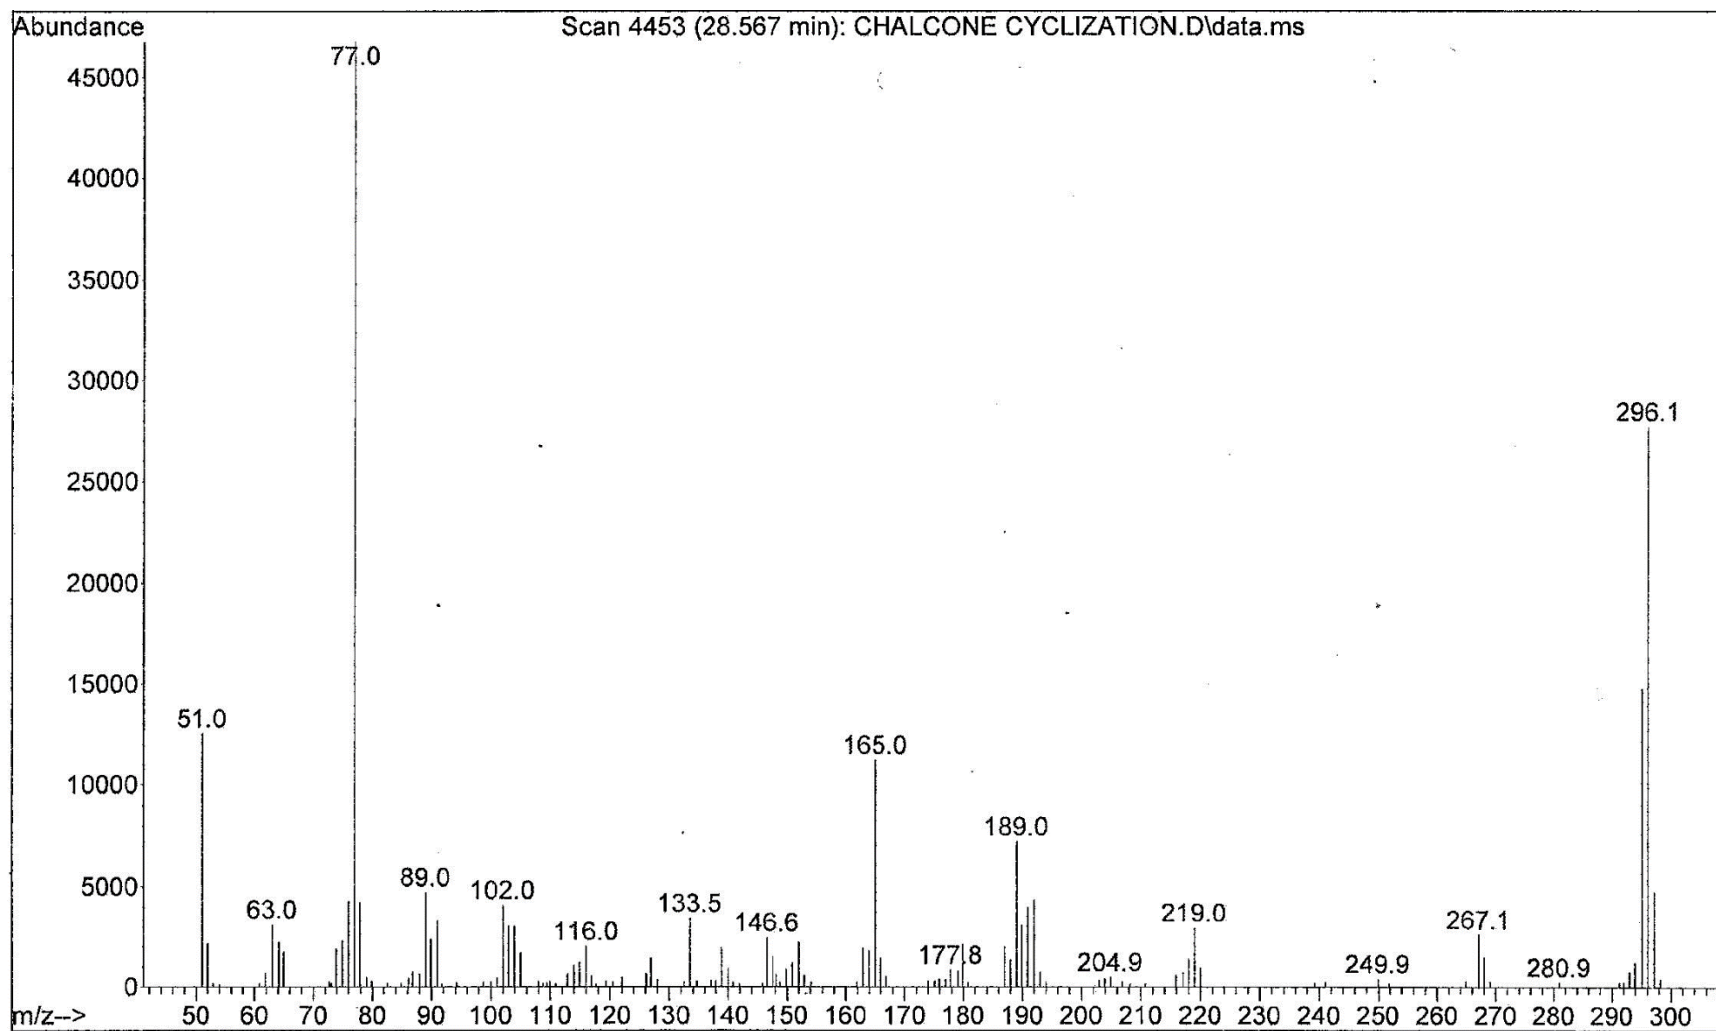

3-methyl-1,5-diphenyl-1H-pyrazole (P14): <sup>1</sup>H-NMR (CDCl<sub>3</sub>)

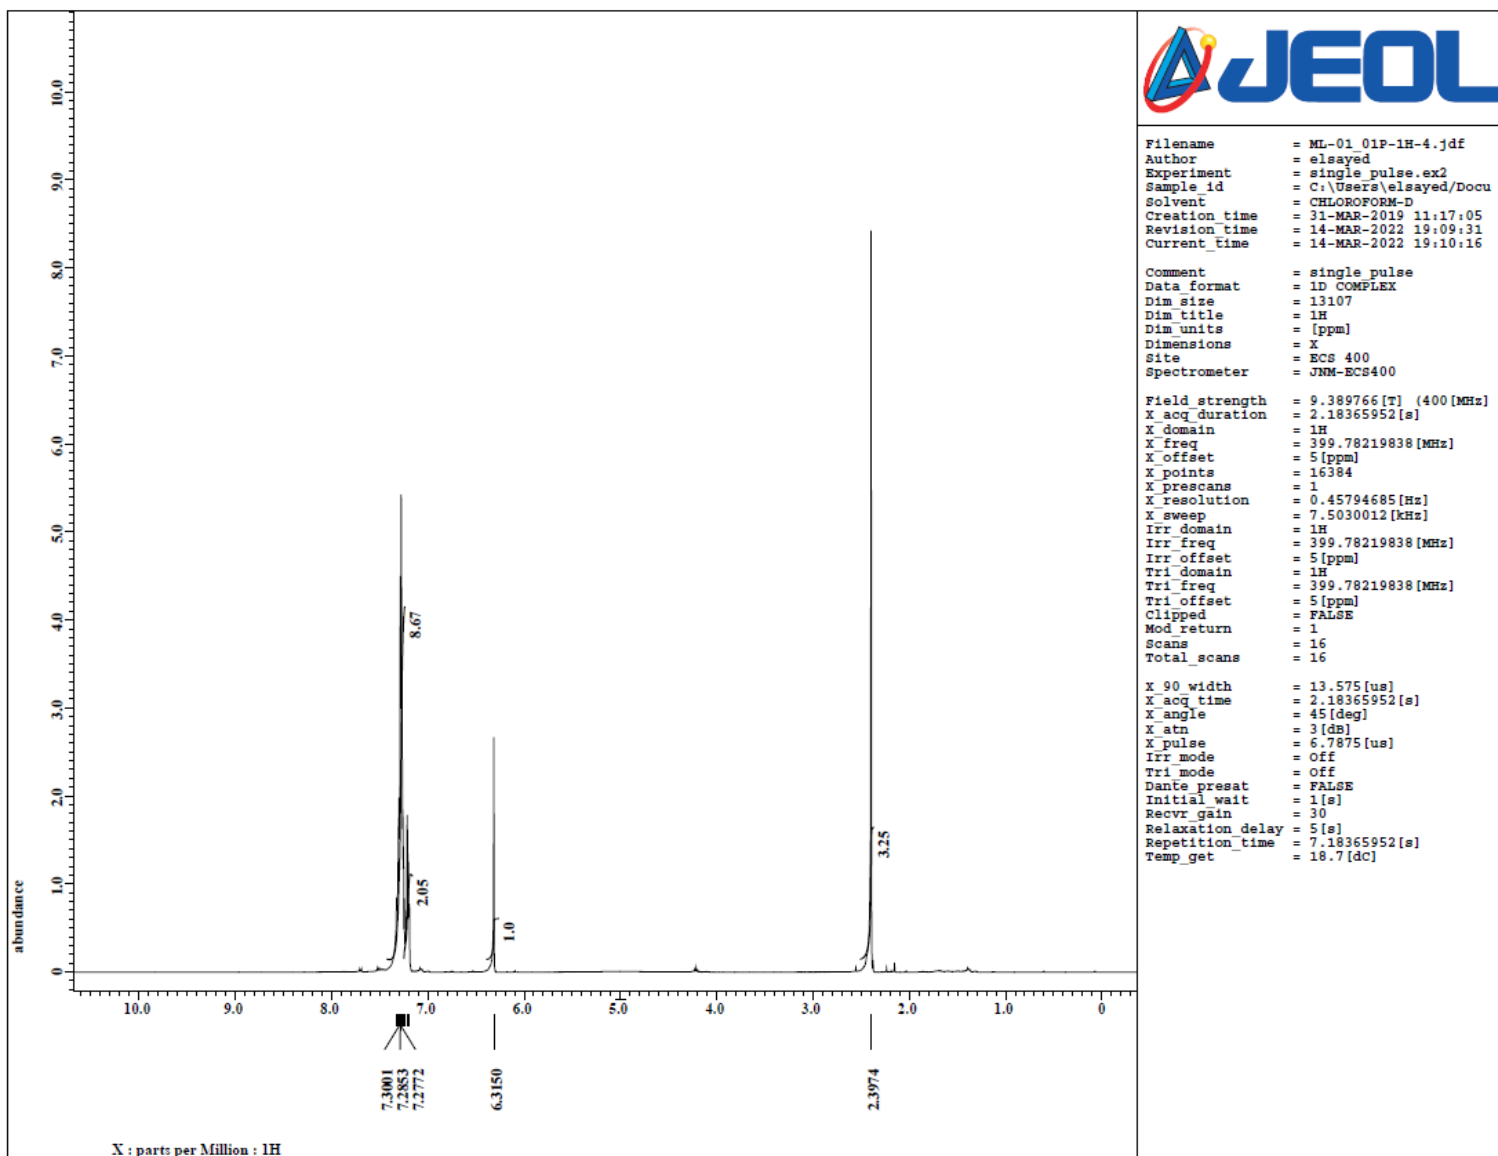

### 3-methyl-1,5-diphenyl-1H-pyrazole (P14): <sup>1</sup>H-NMR (CDCl<sub>3</sub>) \_ Expanded Aromatic Region

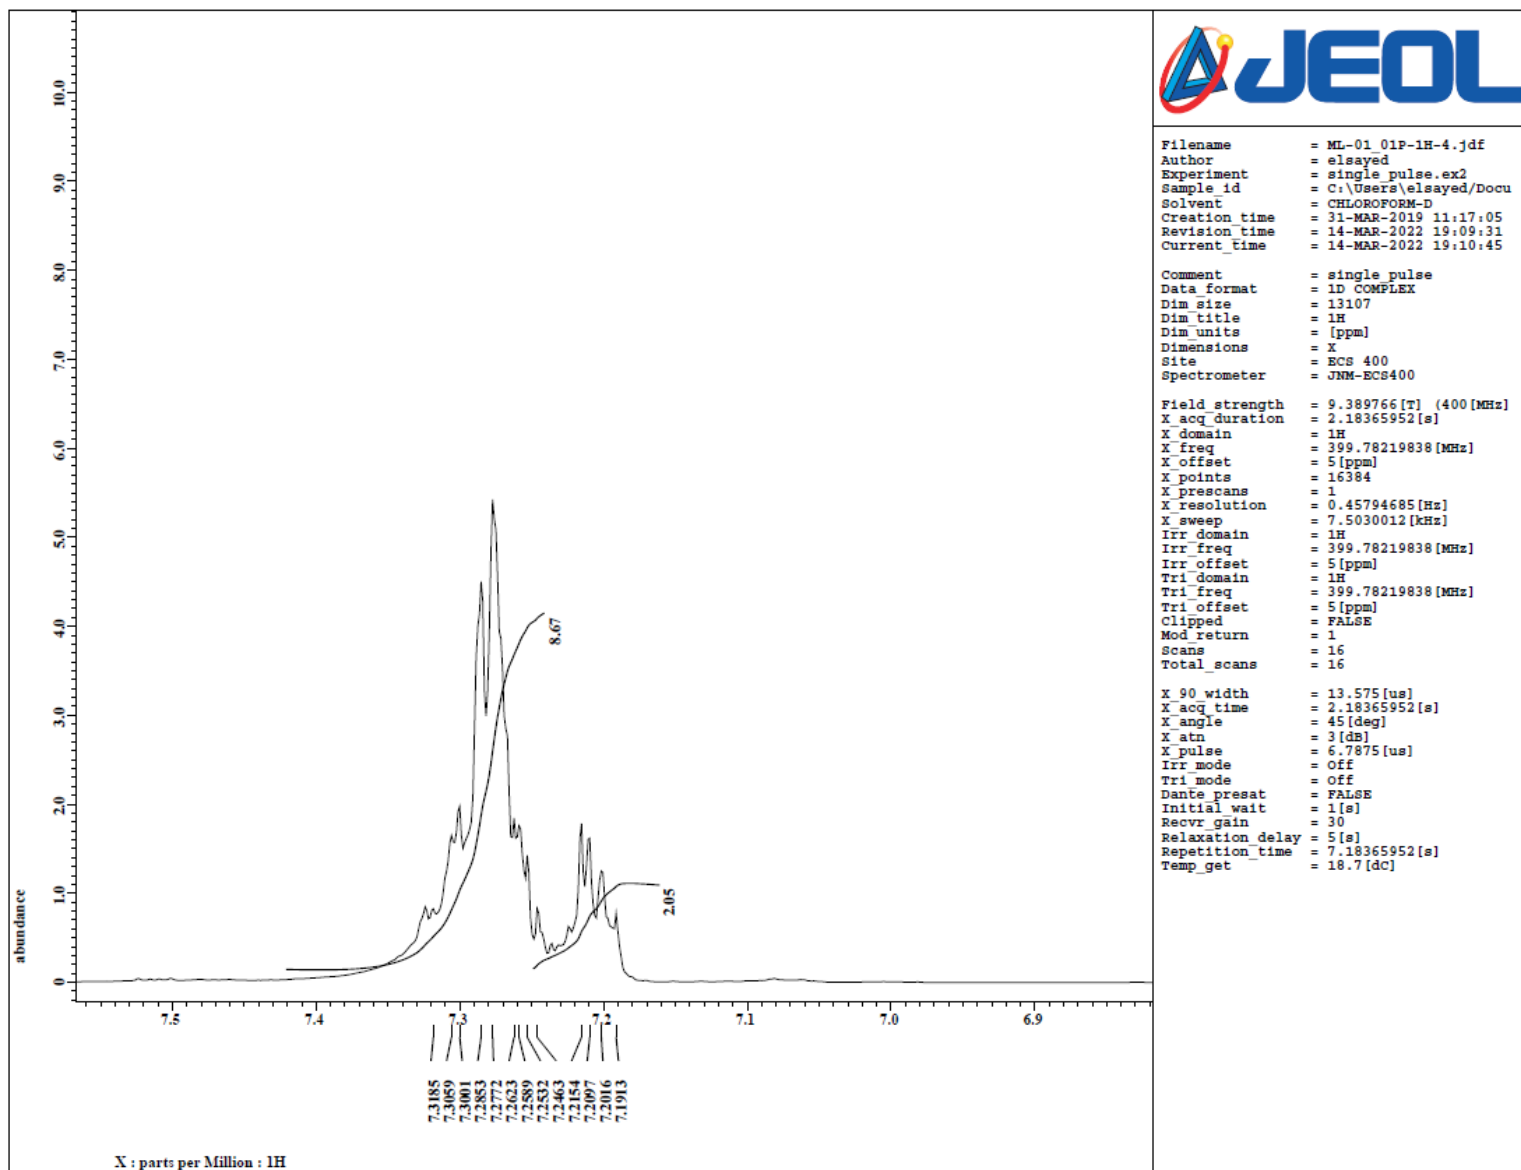

3-methyl-1,5-diphenyl-1H-pyrazole (P14): <sup>13</sup>C-NMR (CDCl<sub>3</sub>)

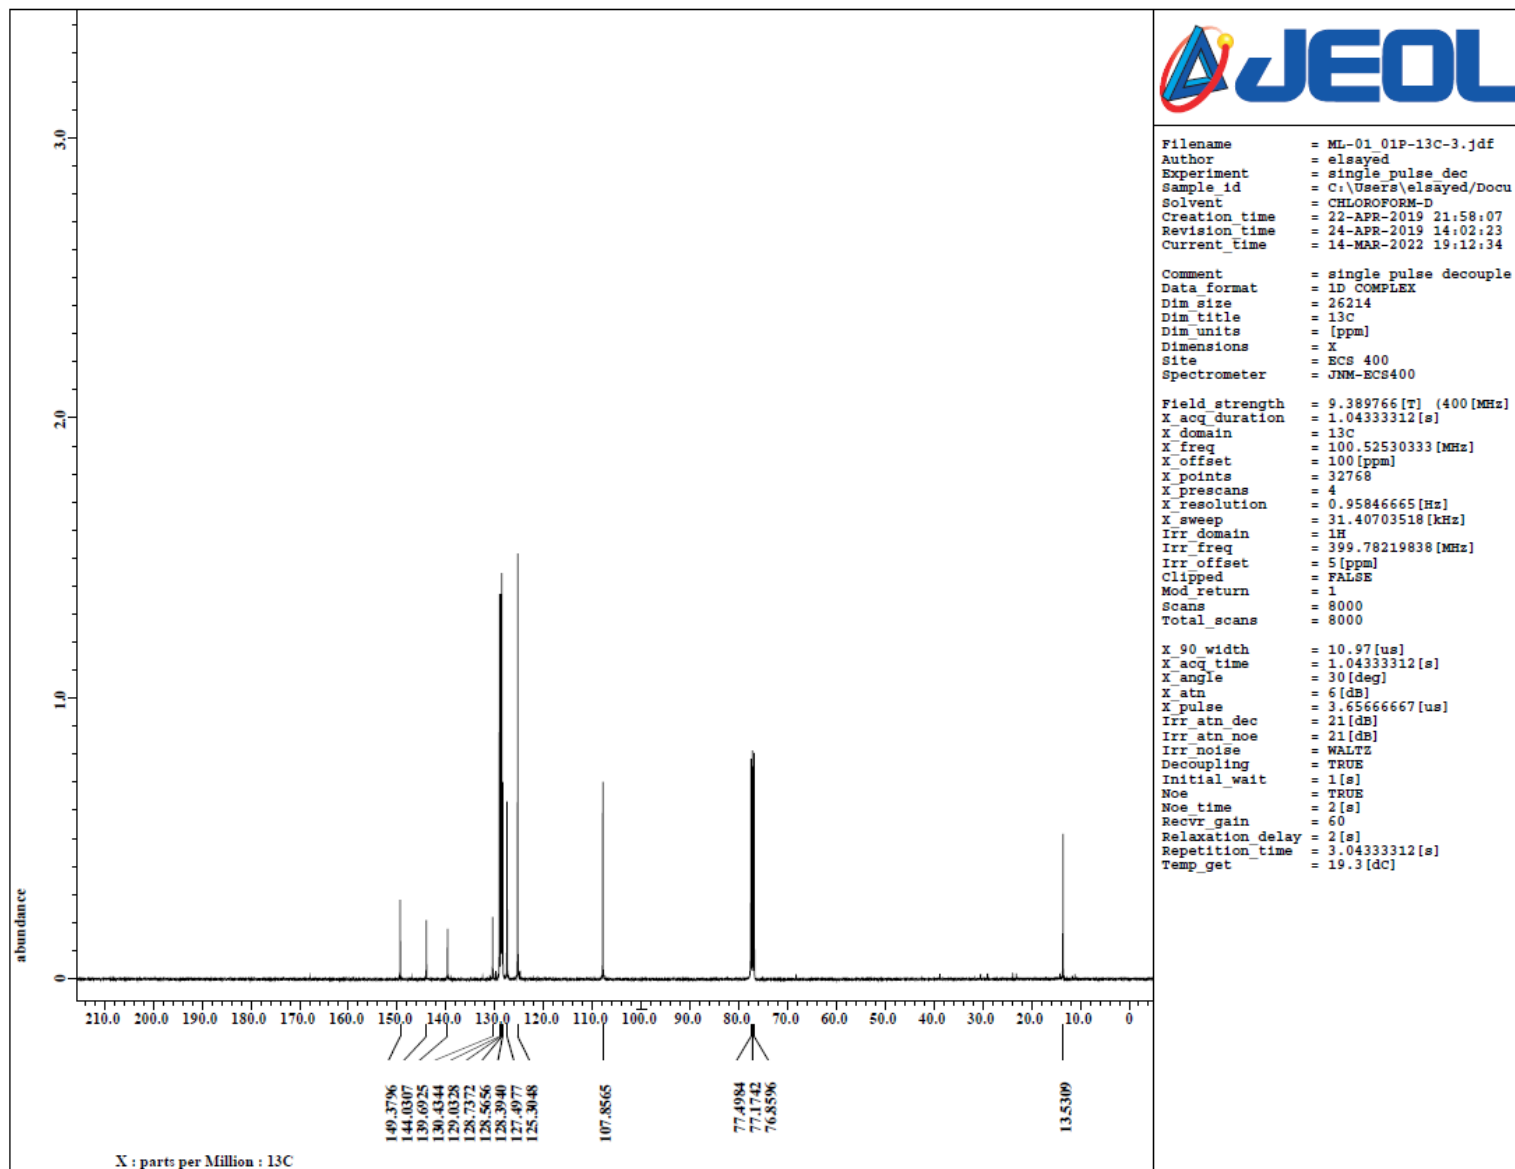

### 3-methyl-1,5-diphenyl-1H-pyrazole (P14): <sup>13</sup>C-NMR (CDCl<sub>3</sub>) \_ Expanded Aromatic Region

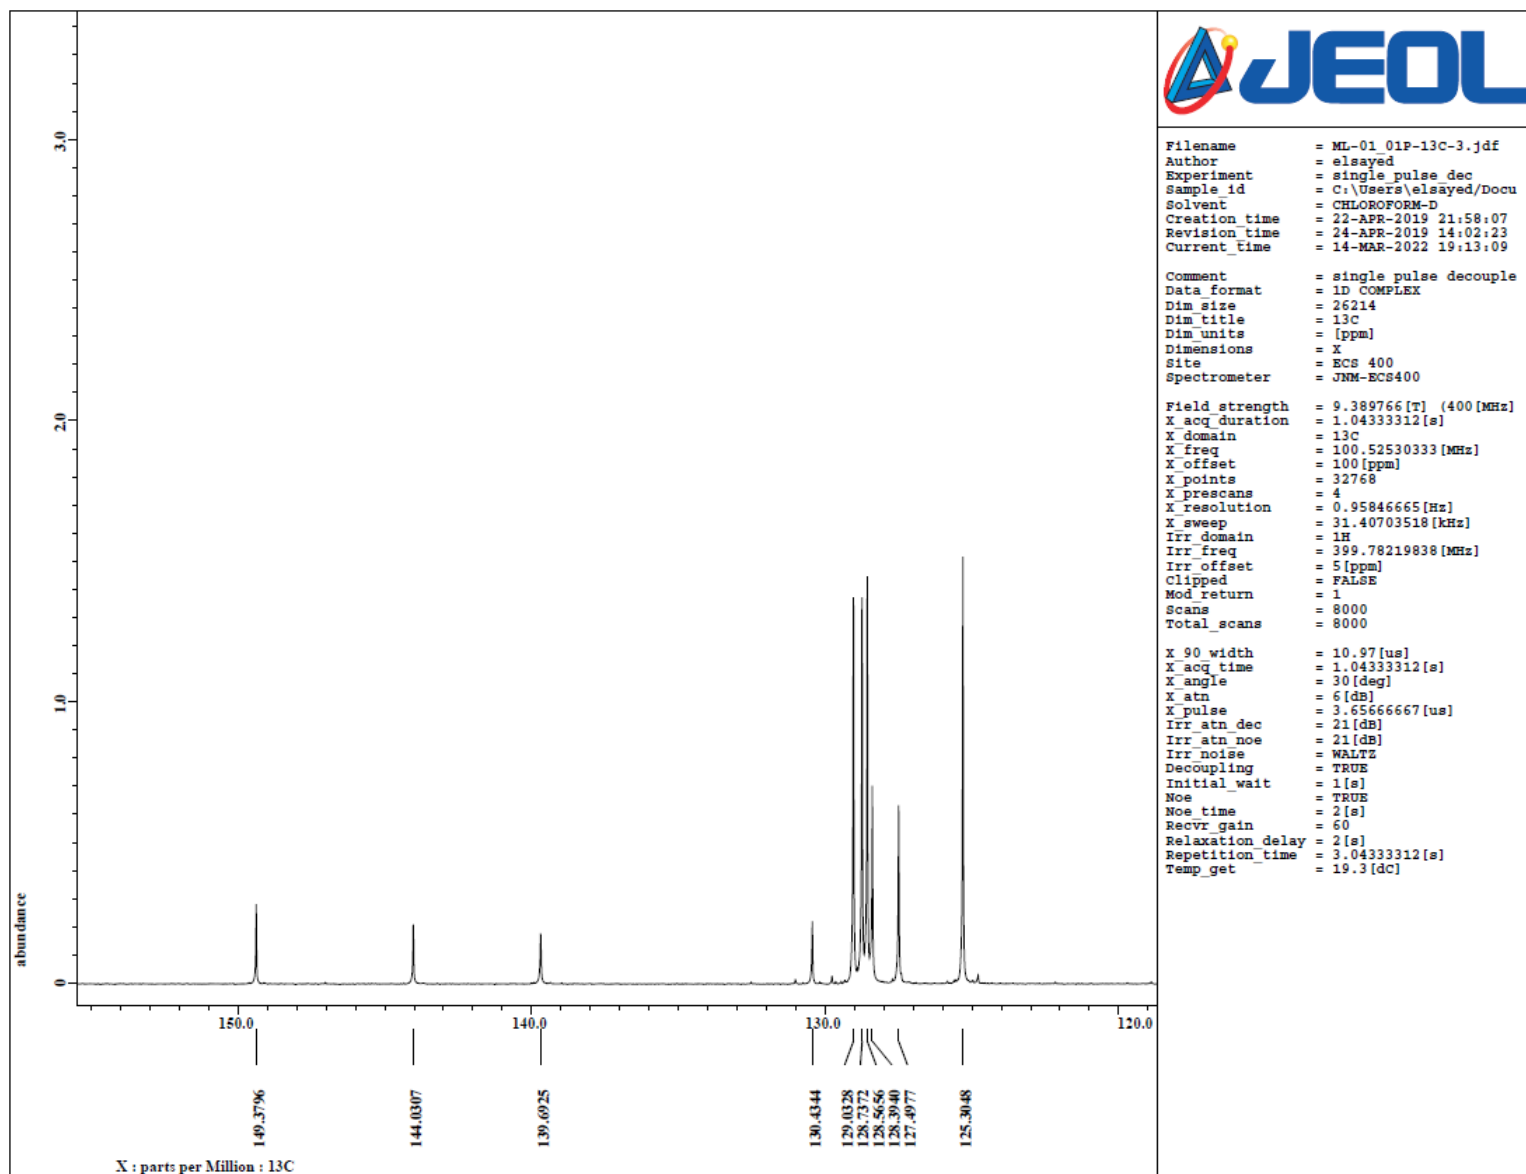

### 3-methyl-1,5-diphenyl-1H-pyrazole (P14): ESI-MS

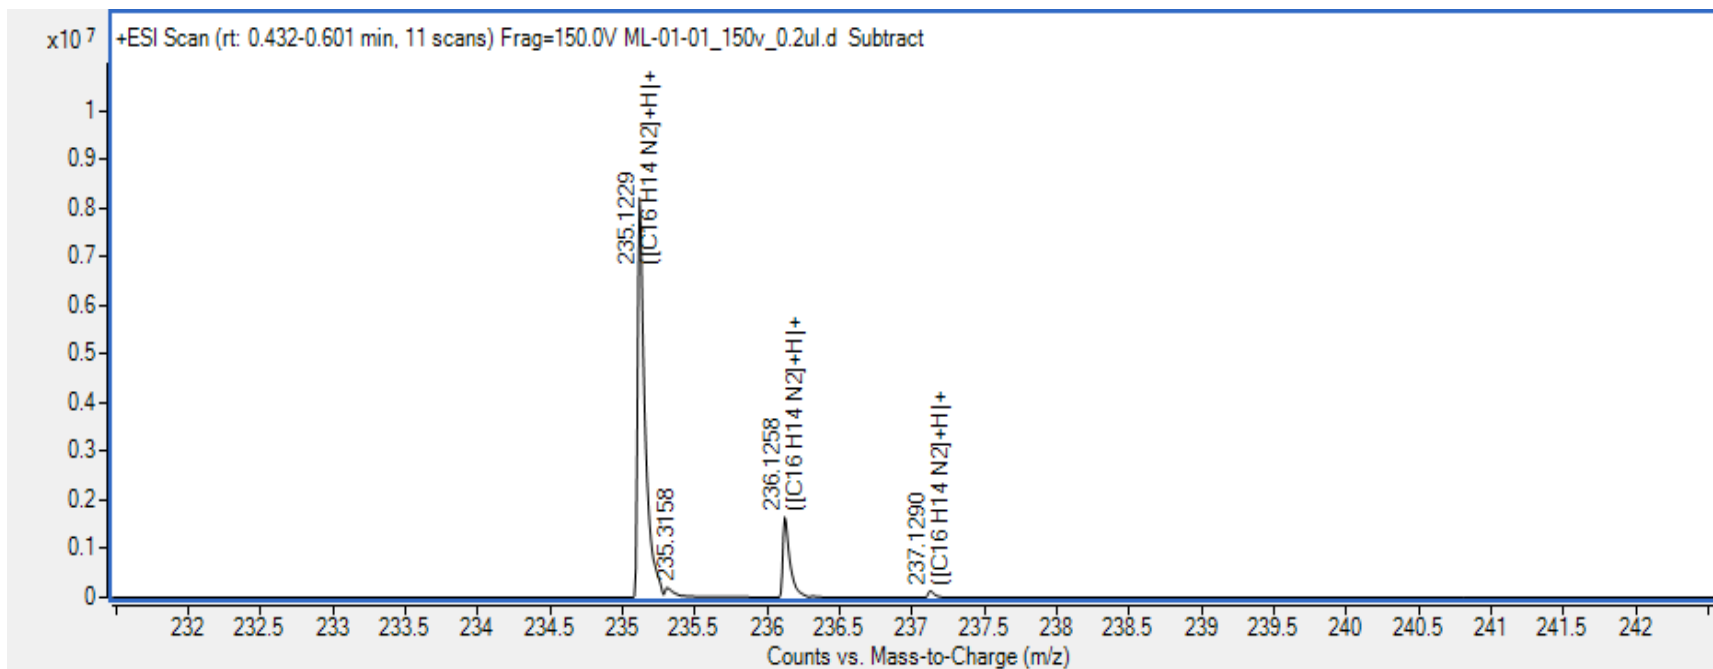

| Formula    | Species | m/z      | Score | Diff (abs. ppm) | Mass     |
|------------|---------|----------|-------|-----------------|----------|
| C16 H14 N2 | (M+H)+  | 235.1229 | 98.87 | 0.54            | 234.1156 |



# 1,5-diphenyl-3-(trifluoromethyl)-1H-pyrazole (P15): <sup>1</sup>H-NMR (CDCl<sub>3</sub>)

<sup>1</sup>H NMR of 84

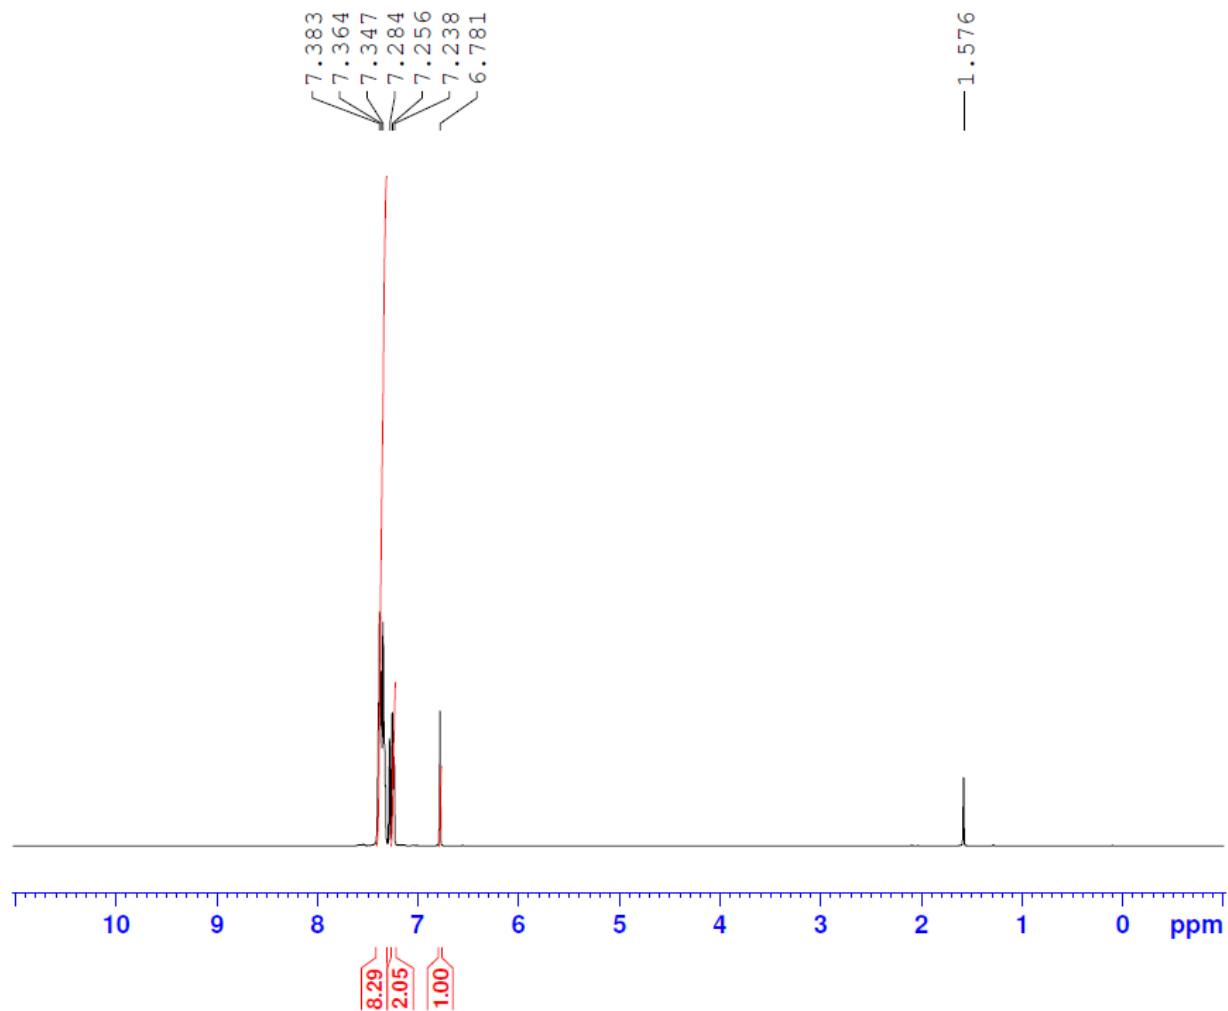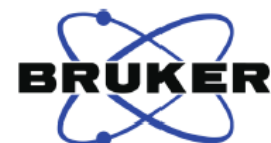

Current Data Parameters  
NAME SM-84\_1H  
EXPNO 10  
PROCNO 1

F2 - Acquisition Parameters  
Date\_ 20230317  
Time 16.39 h  
INSTRUM Avance Neo  
PROBHD z140678\_0053 (  
PULPROG zg30  
TD 65536  
SOLVENT CDCl3  
NS 16  
DS 2  
SWH 8196.722 Hz  
FIDRES 0.250144 Hz  
AQ 3.9976959 sec  
RG 101  
DW 61.000 usec  
DE 13.54 usec  
TE 296.3 K  
D1 1.00000000 sec  
TD0 1  
SF01 400.1424709 MHz  
NUC1 1H  
P0 3.33 usec  
P1 10.00 usec  
PLW1 22.64200020 W

F2 - Processing parameters  
SI 65536  
SF 400.1400000 MHz  
WDW EM  
SSB 0  
LB 0.30 Hz  
GB 0  
PC 1.00

# 1,5-diphenyl-3-(trifluoromethyl)-1H-pyrazole (P15): <sup>1</sup>H-NMR (CDCl<sub>3</sub>) \_ Expanded Aromatic Region

<sup>1</sup>H NMR of 84

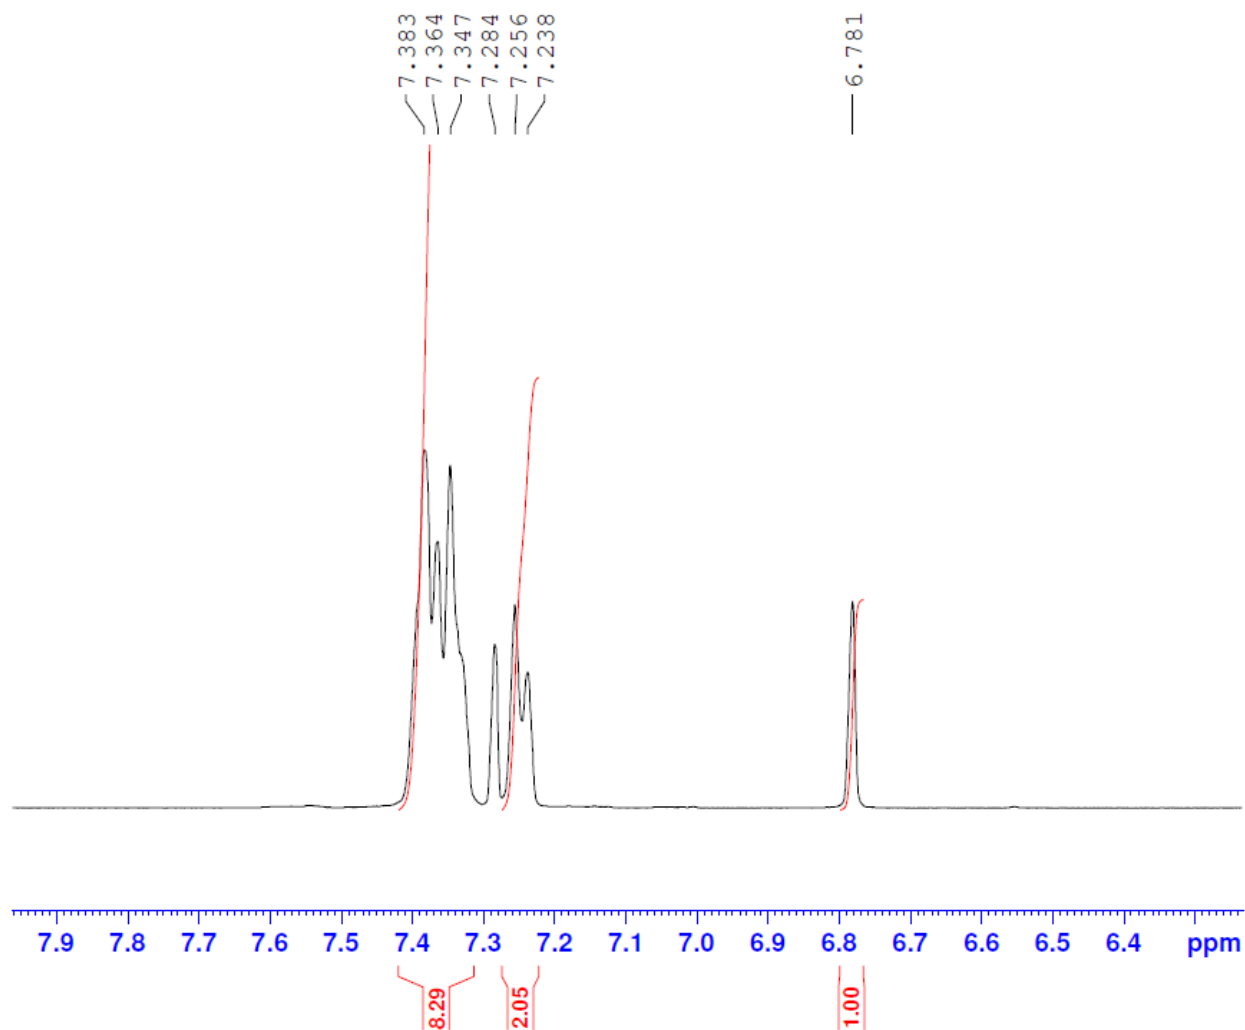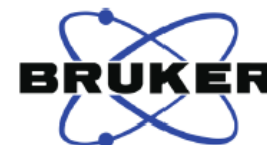

Current Data Parameters  
NAME SM-84\_1H  
EXPNO 10  
PROCNO 1

F2 - Acquisition Parameters  
Date\_ 20230317  
Time 16.39 h  
INSTRUM Avance Neo  
PROBHD z140678\_0053 ( )  
PULPROG zg30  
TD 65536  
SOLVENT CDCl3  
NS 16  
DS 2  
SWH 8196.722 Hz  
FIDRES 0.250144 Hz  
AQ 3.9976959 sec  
RG 101  
DW 61.000 usec  
DE 13.54 usec  
TE 296.3 K  
D1 1.00000000 sec  
TDO 1  
SFO1 400.1424709 MHz  
NUC1 1H  
P0 3.33 usec  
P1 10.00 usec  
PLW1 22.64200020 W

F2 - Processing parameters  
SI 65536  
SF 400.1400000 MHz  
WDW EM  
SSB 0  
LB 0.30 Hz  
GB 0  
PC 1.00

1,5-diphenyl-3-(trifluoromethyl)-1H-pyrazole (P15):  $^{13}\text{C}$ -NMR ( $\text{CDCl}_3$ )

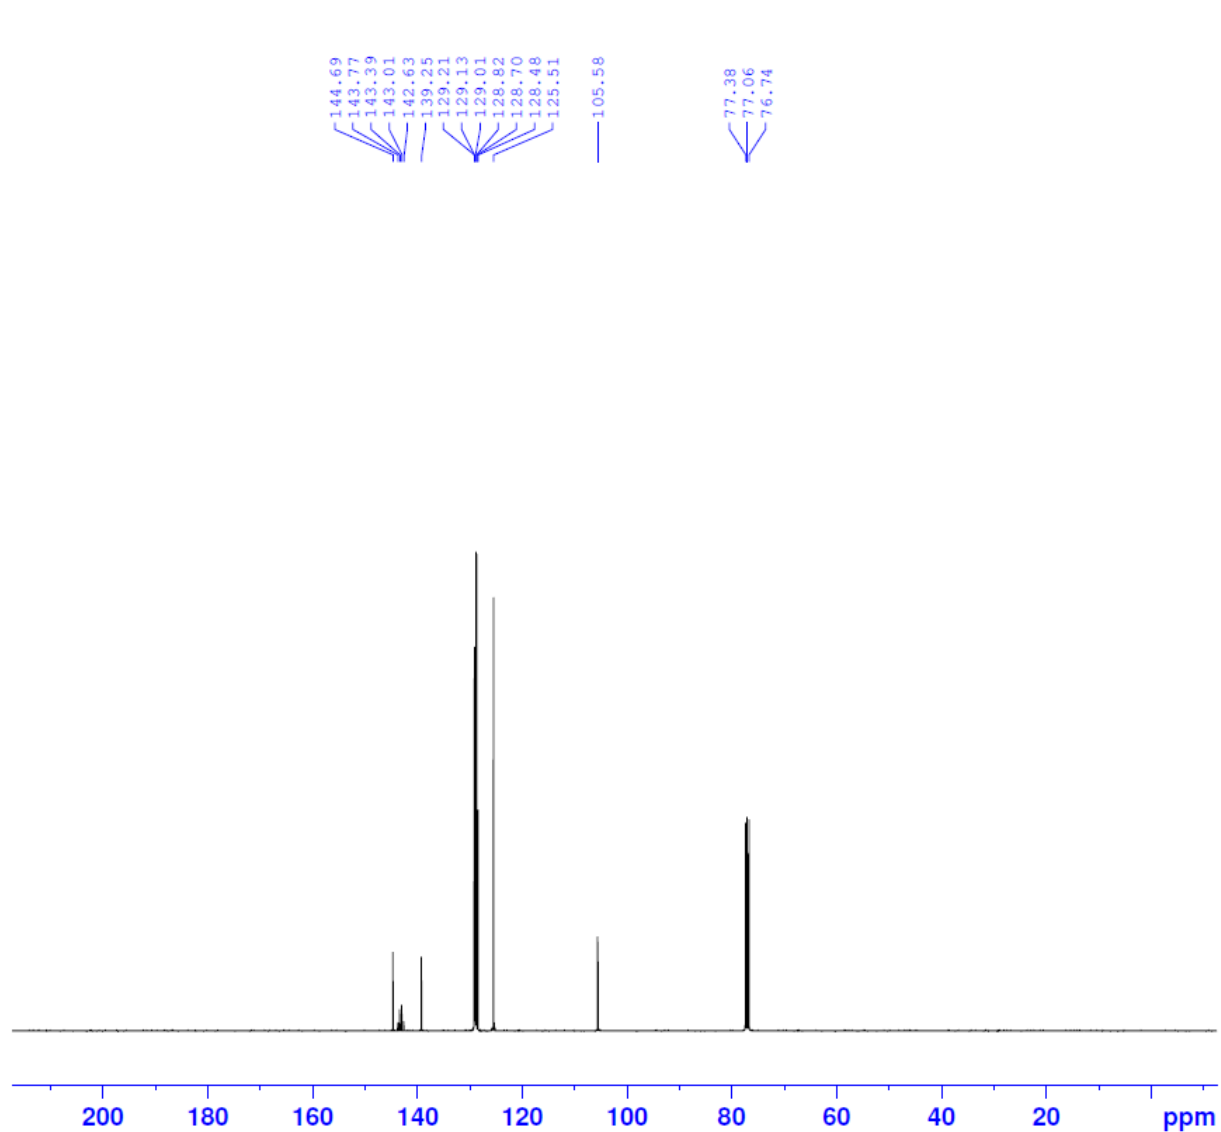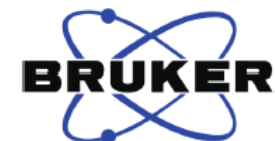

Current Data Parameters  
 NAME SM-84\_1Hand13C  
 EXPNO 11  
 PROCNO 1

F2 - Acquisition Parameters  
 Date\_ 20230318  
 Time 13.27 h  
 INSTRUM Avance Neo  
 PROBHD Z140678\_0053 (zpgg30)  
 PULPROG zpgg30  
 TD 65536  
 SOLVENT CDCl3  
 NS 4096  
 DS 4  
 SWH 23809.523 Hz  
 FIDRES 0.726609 Hz  
 AQ 1.3762560 sec  
 RG 16  
 DW 21.000 usec  
 DE 6.50 usec  
 TE 296.2 K  
 D1 2.00000000 sec  
 D11 0.03000000 sec  
 TD0 1  
 SFO1 100.6253446 MHz  
 NUC1 13C  
 P0 3.33 usec  
 P1 10.00 usec  
 PLW1 77.80000305 W  
 SFO2 400.1416006 MHz  
 NUC2 1H  
 CPDPRG[2] waltz65  
 PCPD2 90.00 usec  
 PLW2 22.64200020 W  
 PLW12 0.27952999 W  
 PLW13 0.14060000 W

F2 - Processing parameters  
 SI 32768  
 SF 100.6152830 MHz  
 WDW EM  
 SSB 0  
 LB 1.00 Hz  
 GB 0  
 PC 1.40

# 1,5-diphenyl-3-(trifluoromethyl)-1H-pyrazole (P15): <sup>13</sup>C-NMR (CDCl<sub>3</sub>) \_ Expanded Aromatic Region

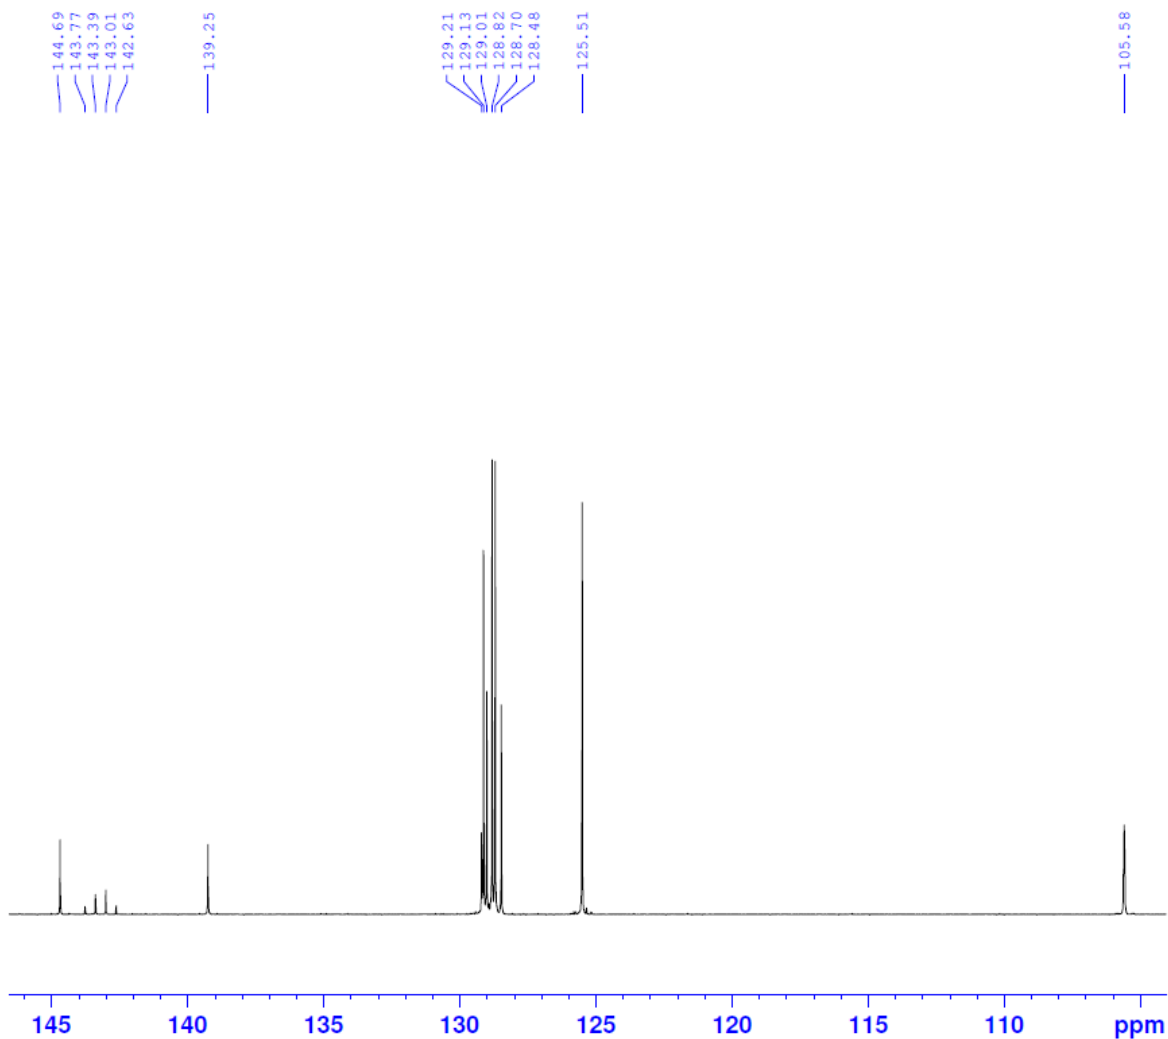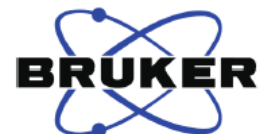

Current Data Parameters  
NAME SM-84\_1Hand13C  
EXPNO 11  
PROCNO 1

F2 - Acquisition Parameters  
Date\_ 20230318  
Time 13.27 h  
INSTRUM Avance Neo  
PROBHD z140678\_0053 (  
PULPROG zgpg30  
TD 65536  
SOLVENT CDCl3  
NS 4096  
DS 4  
SWH 23809.523 Hz  
FIDRES 0.726609 Hz  
AQ 1.3762560 sec  
RG 16  
DW 21.000 usec  
DE 6.50 usec  
TE 296.2 K  
D1 2.0000000 sec  
D11 0.03000000 sec  
TD0 1  
SFO1 100.6253446 MHz  
NUC1 13C  
P0 3.33 usec  
P1 10.00 usec  
PLW1 77.80000305 W  
SFO2 400.1416006 MHz  
NUC2 1H  
CPDPRG2 waltz65  
PCPD2 90.00 usec  
PLW2 22.64200020 W  
PLW12 0.27952999 W  
PLW13 0.14060000 W

F2 - Processing parameters  
SI 32768  
SF 100.6152830 MHz  
WDW EM  
SSB 0  
LB 1.00 Hz  
GB 0  
PC 1.40

### 1,5-diphenyl-3-(trifluoromethyl)-1H-pyrazole (P15): ESI-MS

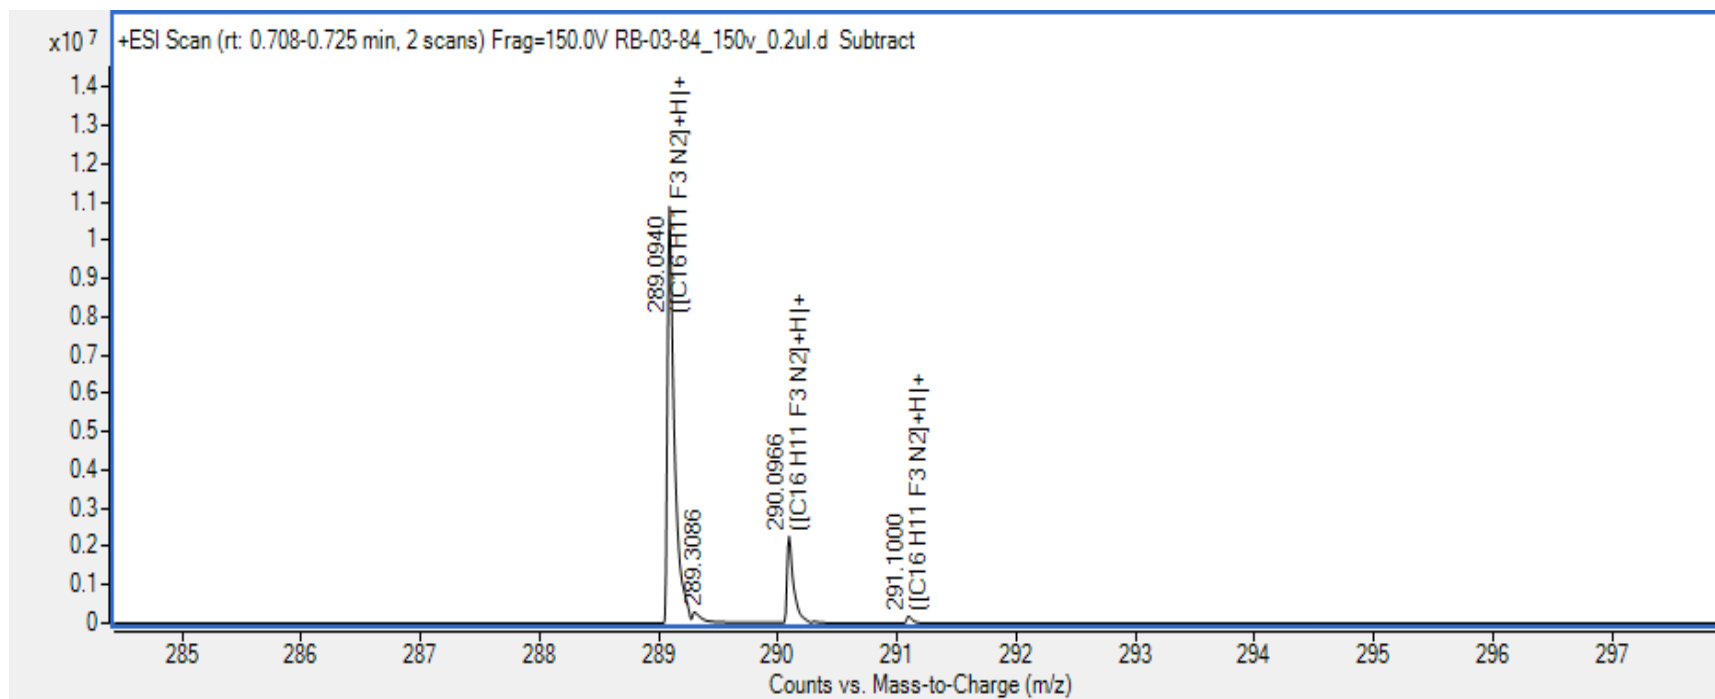

| Formula       | Species            | m/z      | Score | Diff (abs. ppm) | Mass     |
|---------------|--------------------|----------|-------|-----------------|----------|
| C16 H11 F3 N2 | (M+H) <sup>+</sup> | 289.0940 | 95.7  | 2.66            | 288.0867 |

1-(4-bromophenyl)-3-methyl-5-phenyl-1H-pyrazole (P16): <sup>1</sup>H-NMR (CDCl<sub>3</sub>)

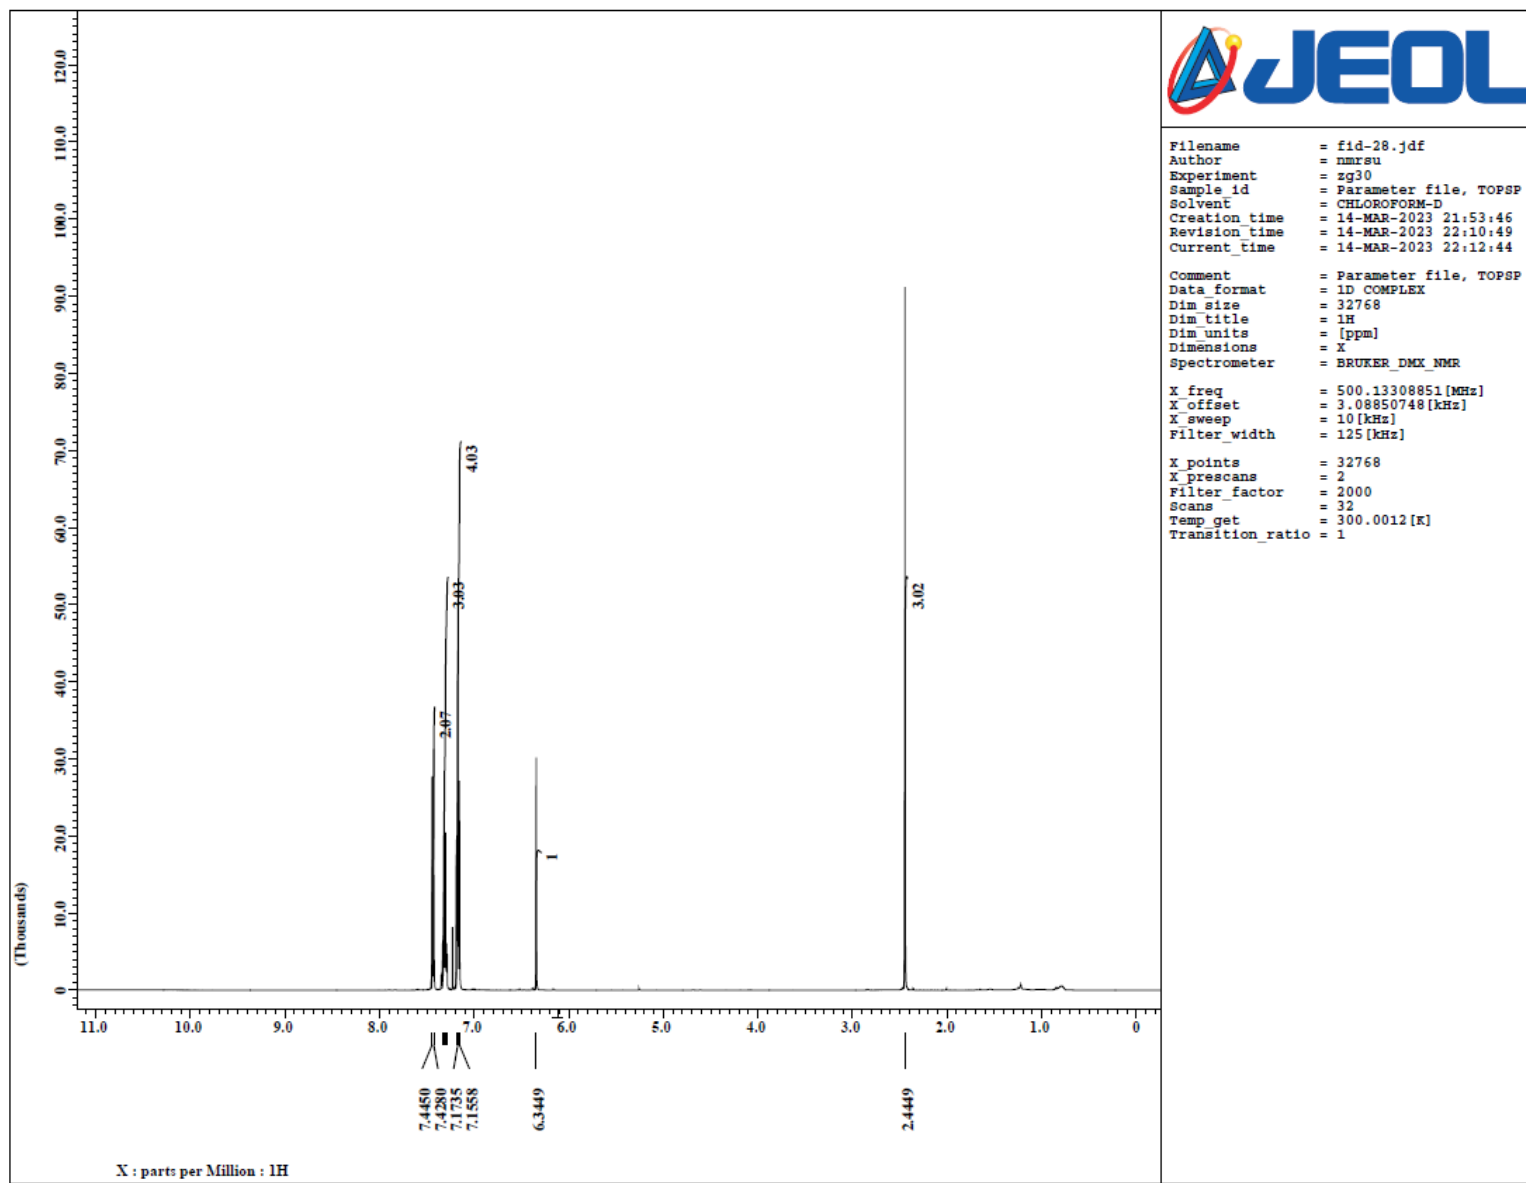

# 1-(4-bromophenyl)-3-methyl-5-phenyl-1H-pyrazole (P16): <sup>1</sup>H-NMR (CDCl<sub>3</sub>) \_ Expanded Aromatic Region

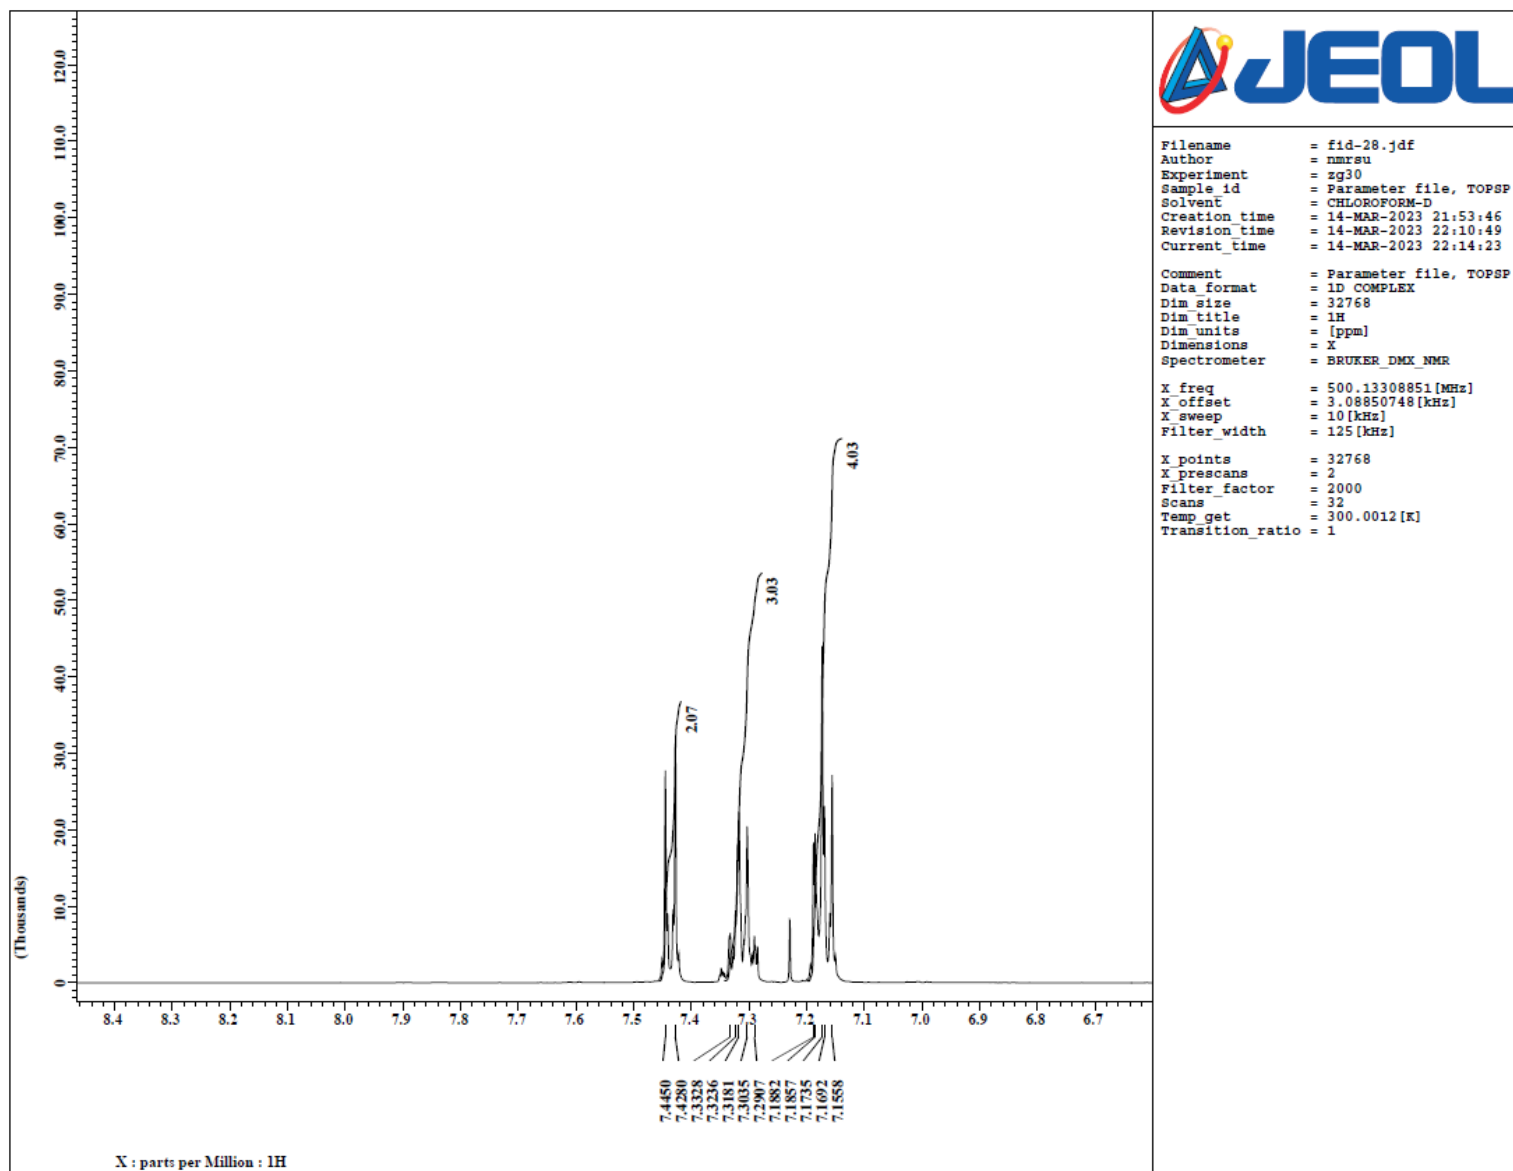

1-(4-bromophenyl)-3-methyl-5-phenyl-1H-pyrazole (P16):  $^{13}\text{C}$ -NMR ( $\text{CDCl}_3$ )

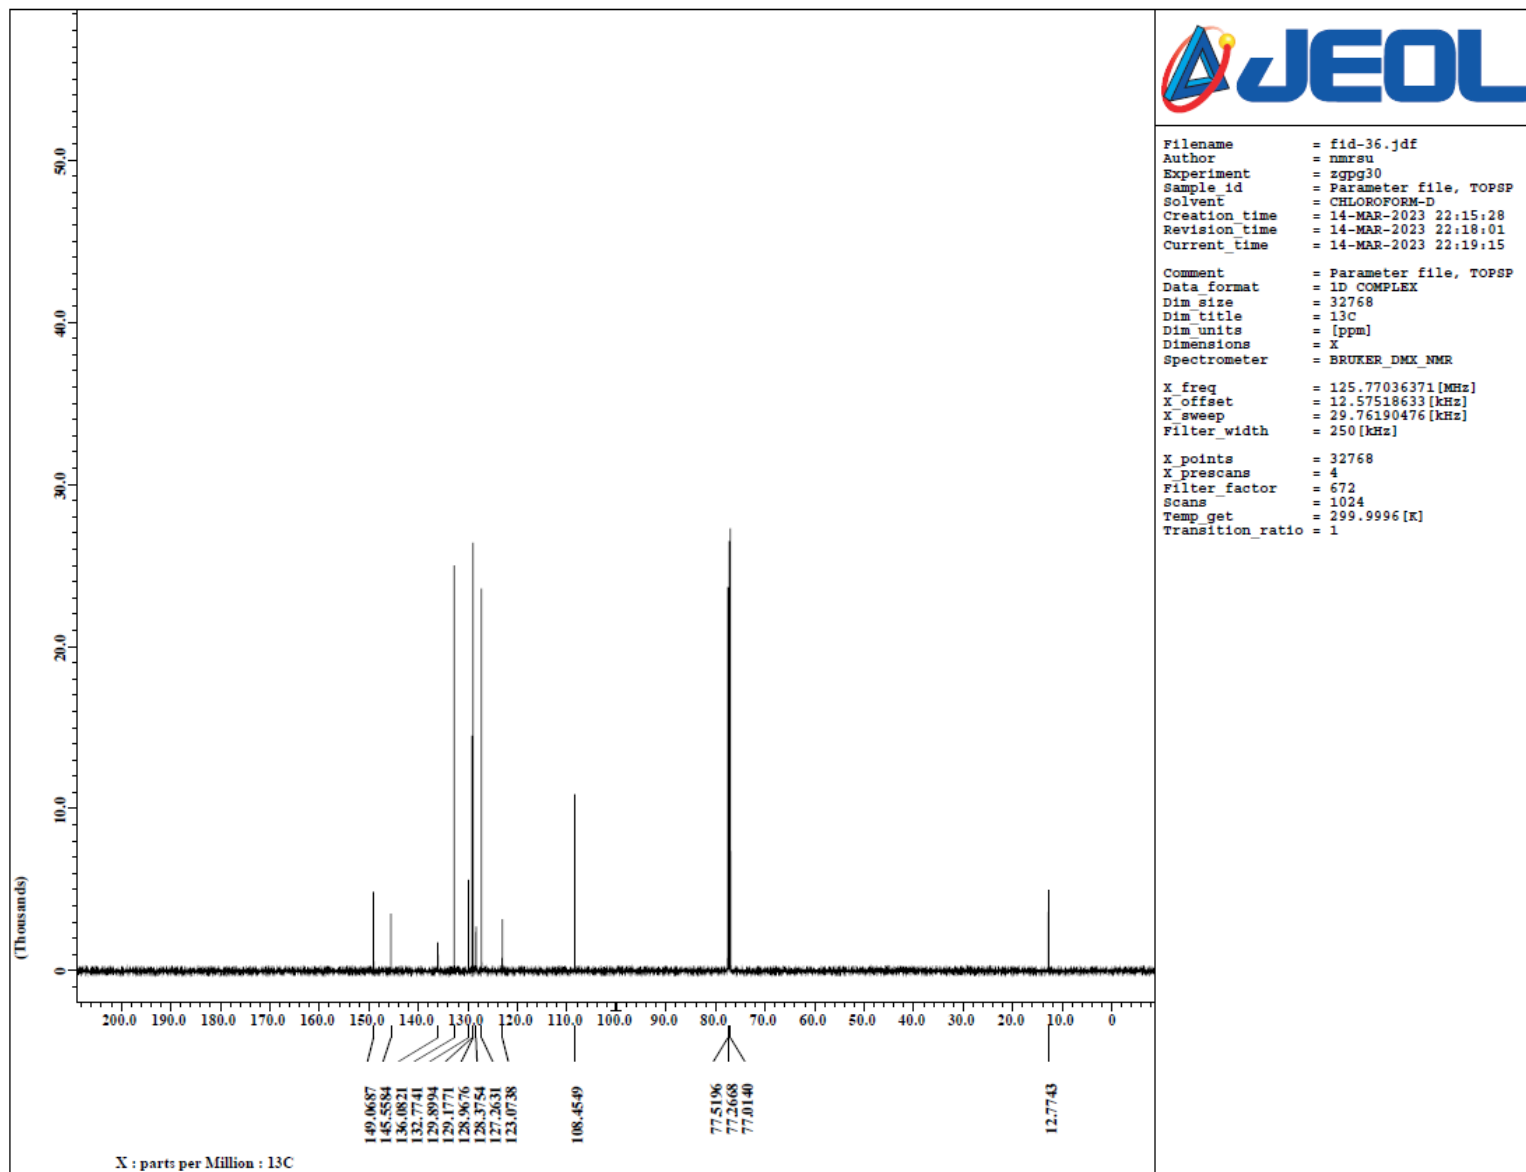



# 1-(4-bromophenyl)-3-methyl-5-phenyl-1H-pyrazole (P16): <sup>13</sup>C-NMR (CDCl<sub>3</sub>) \_ Expanded Aromatic Region

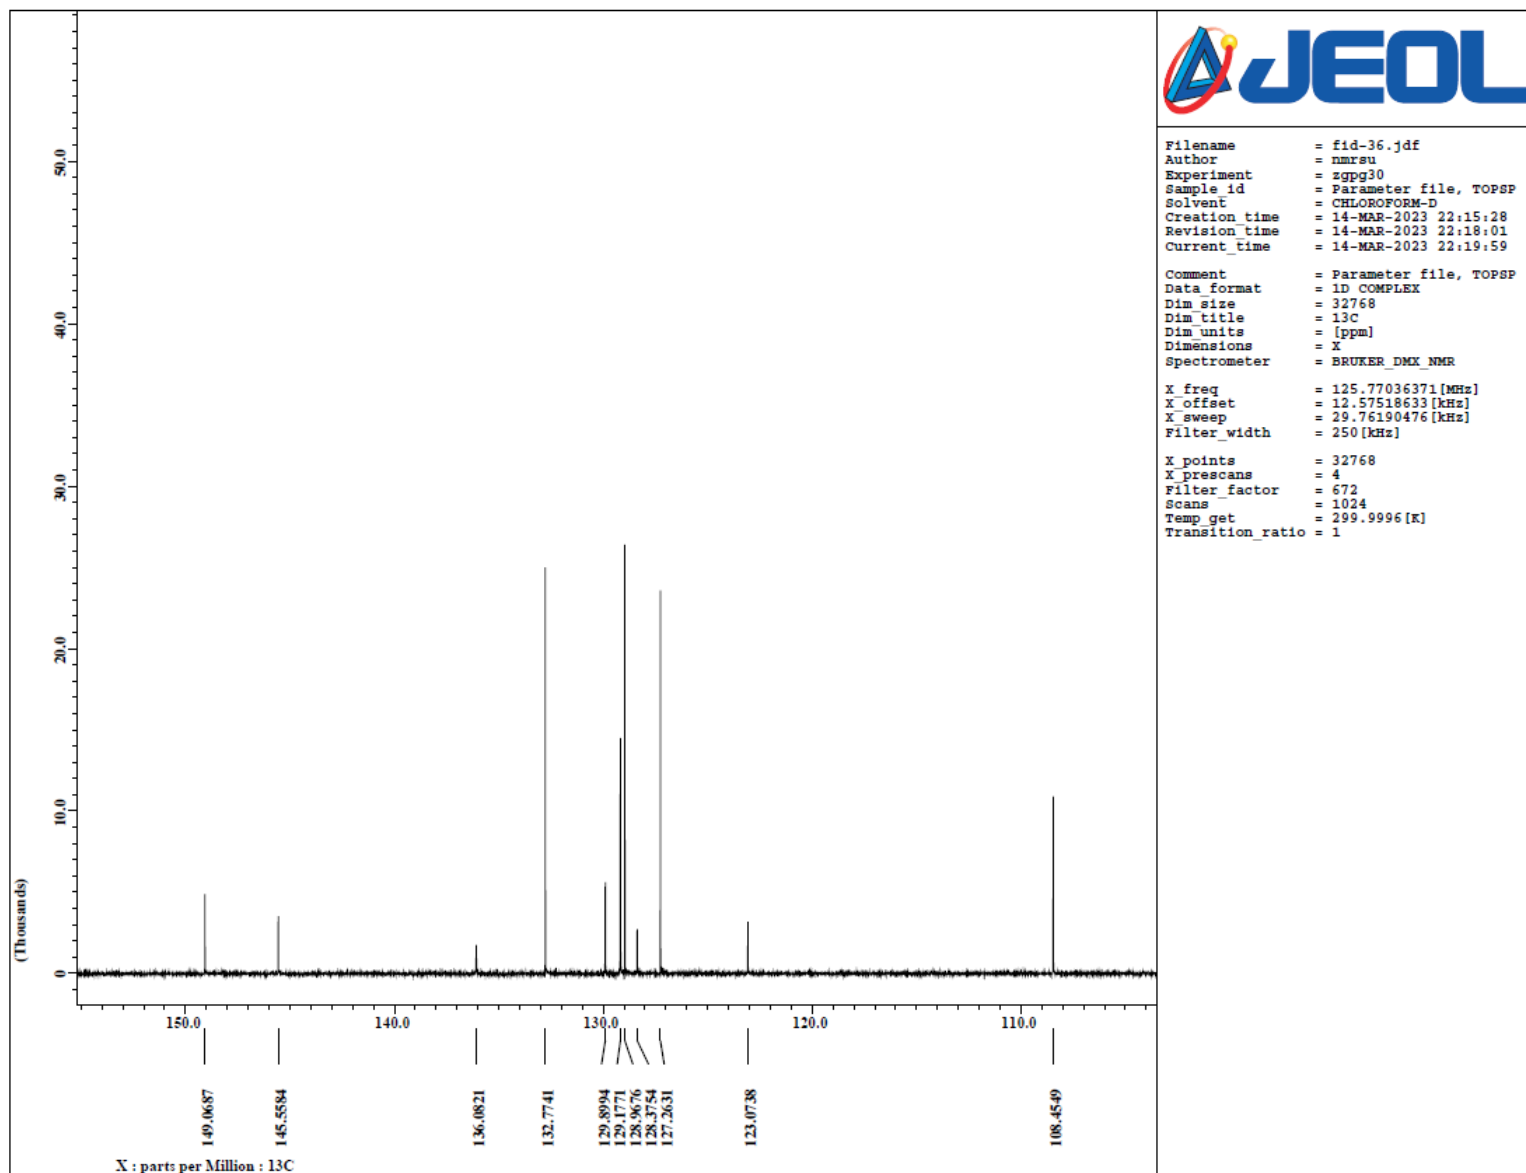

**1-(4-bromophenyl)-3-methyl-5-phenyl-1H-pyrazole (P16): ESI-MS**

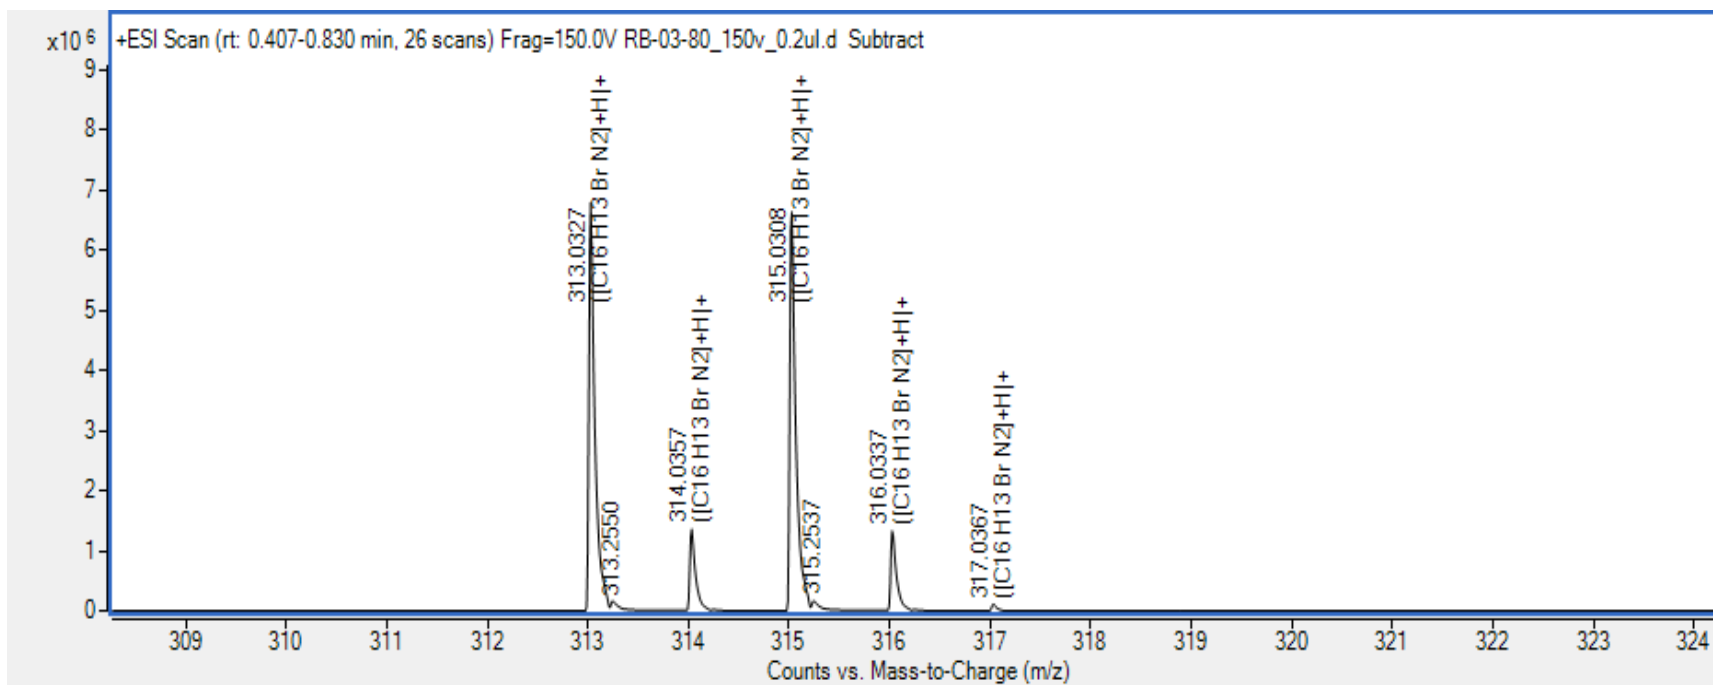

| Formula,       | Species, | m/z,      | Score, | Diff (abs. ppm), | Mass     |
|----------------|----------|-----------|--------|------------------|----------|
| C16 H13 Br N2, | (M+H)+,  | 313.0327, | 96.99, | 2.58,            | 312.0254 |

# 1-(4-chlorophenyl)-3-methyl-5-phenyl-1H-pyrazole (P17): <sup>1</sup>H-NMR (CDCl<sub>3</sub>)

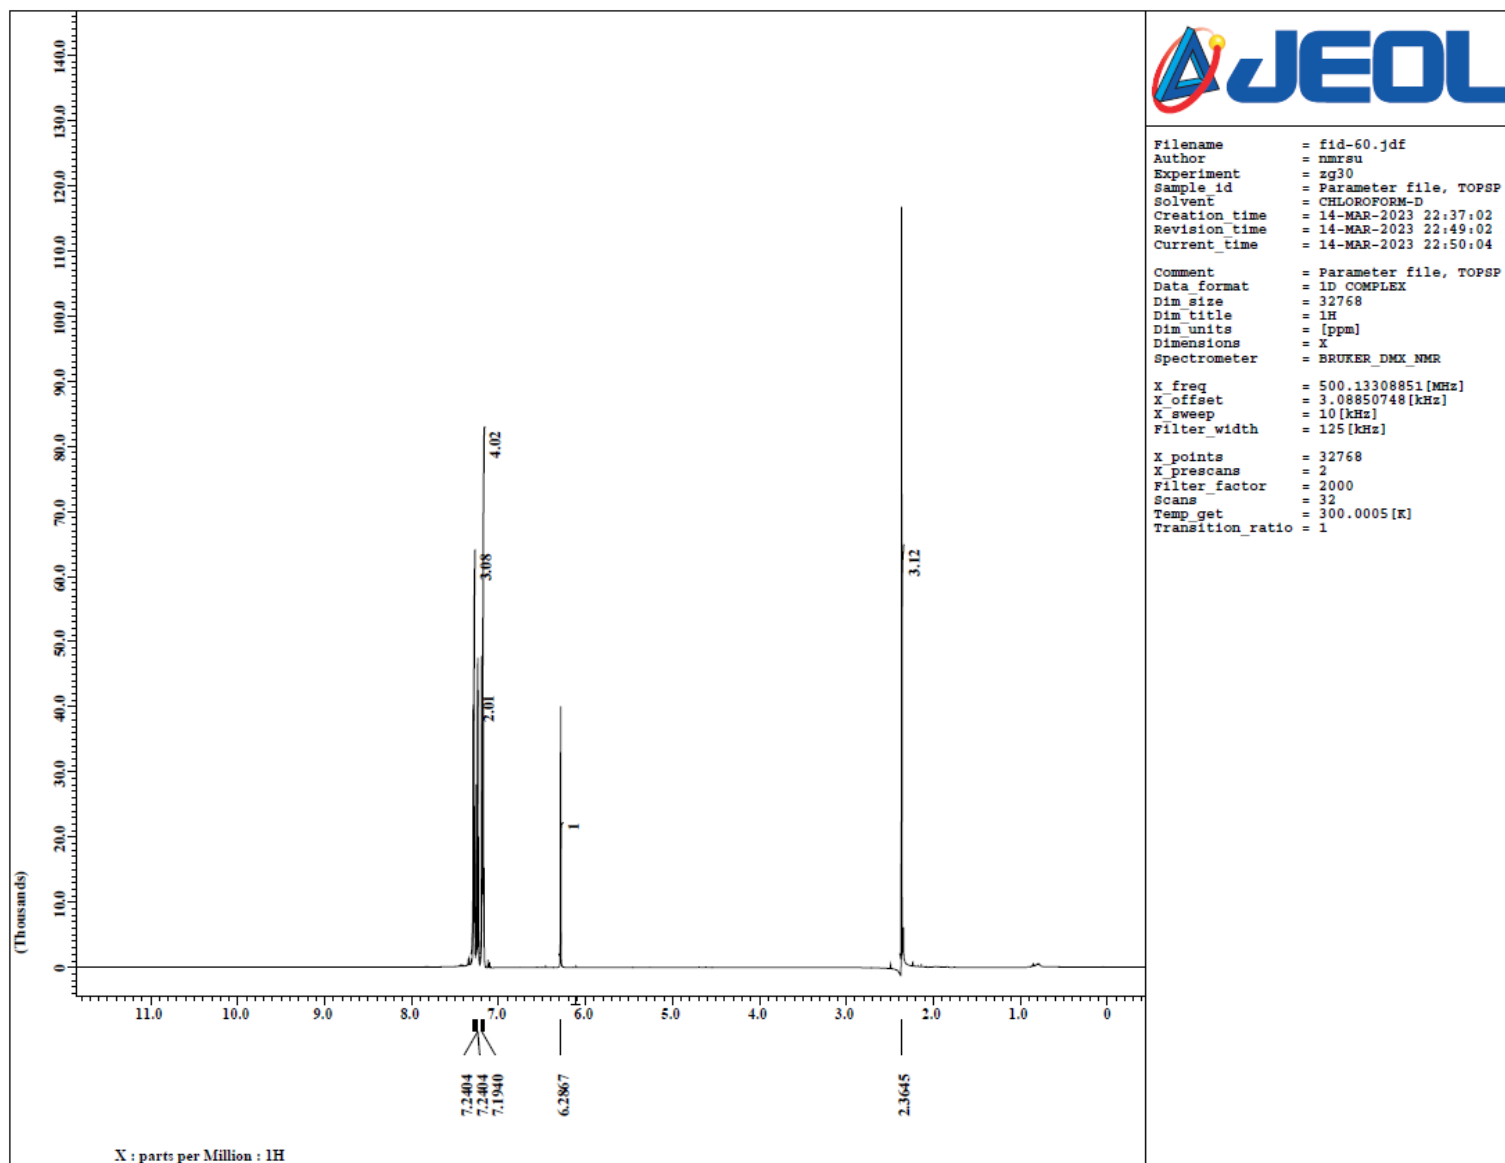

# 1-(4-chlorophenyl)-3-methyl-5-phenyl-1H-pyrazole (P17): <sup>1</sup>H-NMR (CDCl<sub>3</sub>) \_ Expanded Aromatic Region

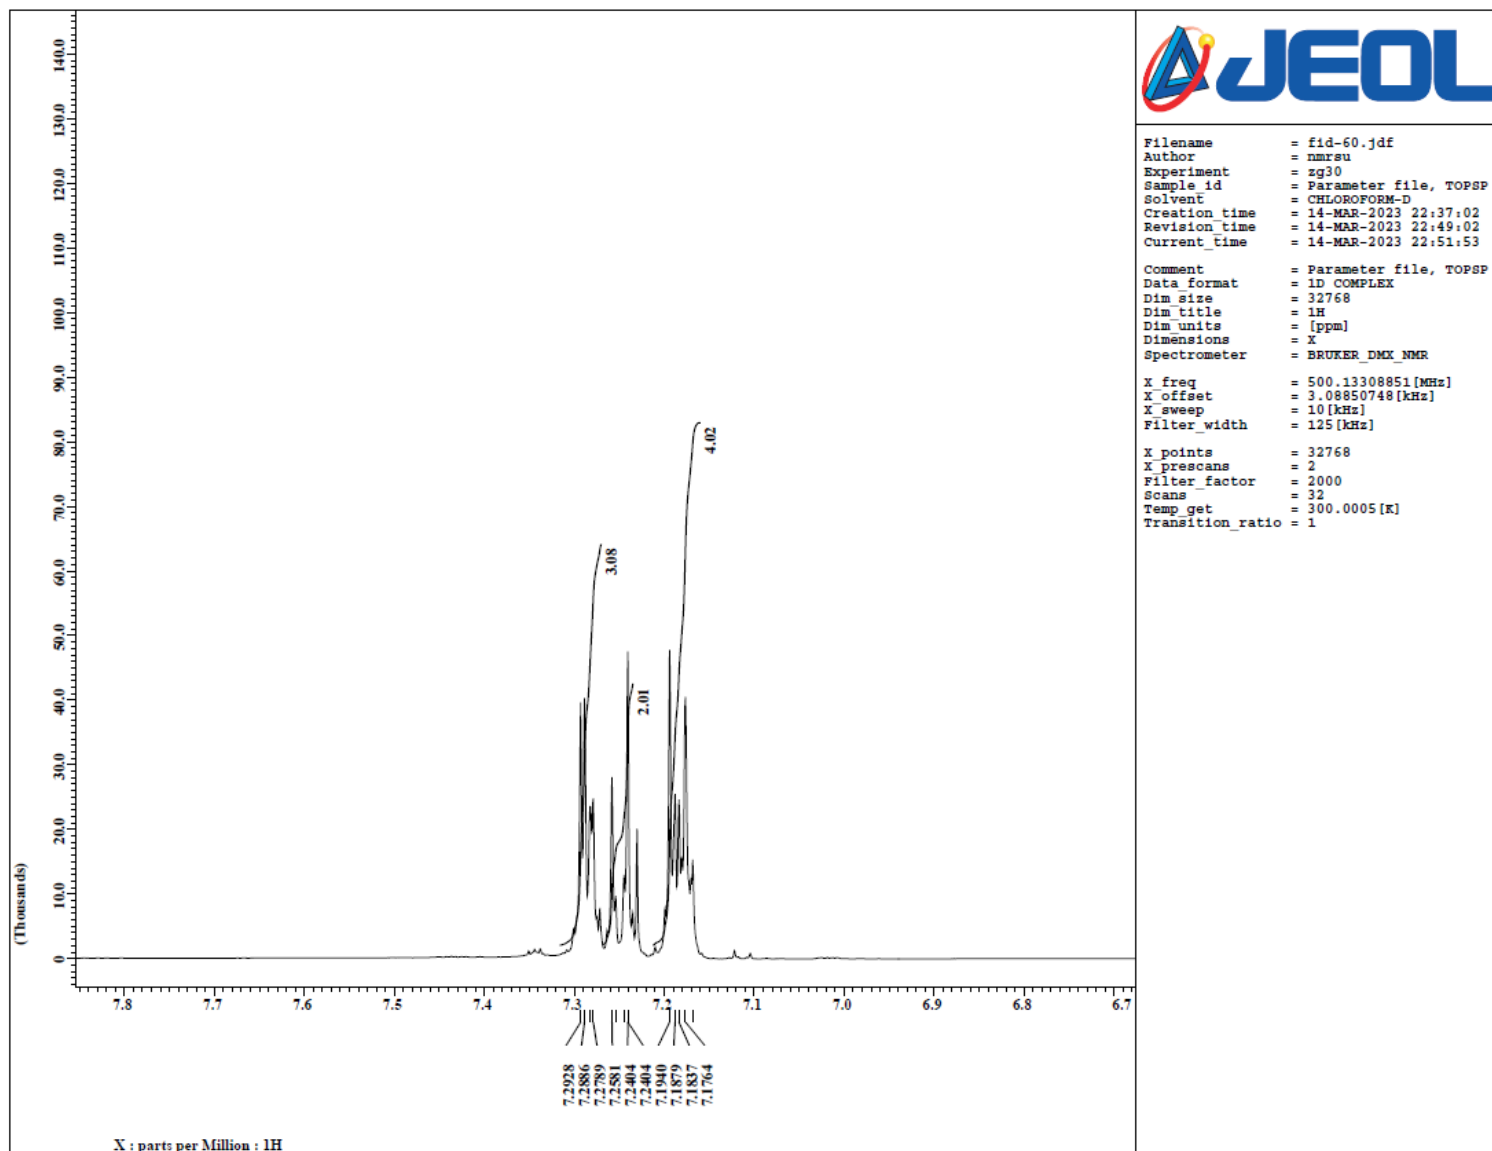

1-(4-chlorophenyl)-3-methyl-5-phenyl-1H-pyrazole (P17): <sup>13</sup>C-NMR (CDCl<sub>3</sub>)

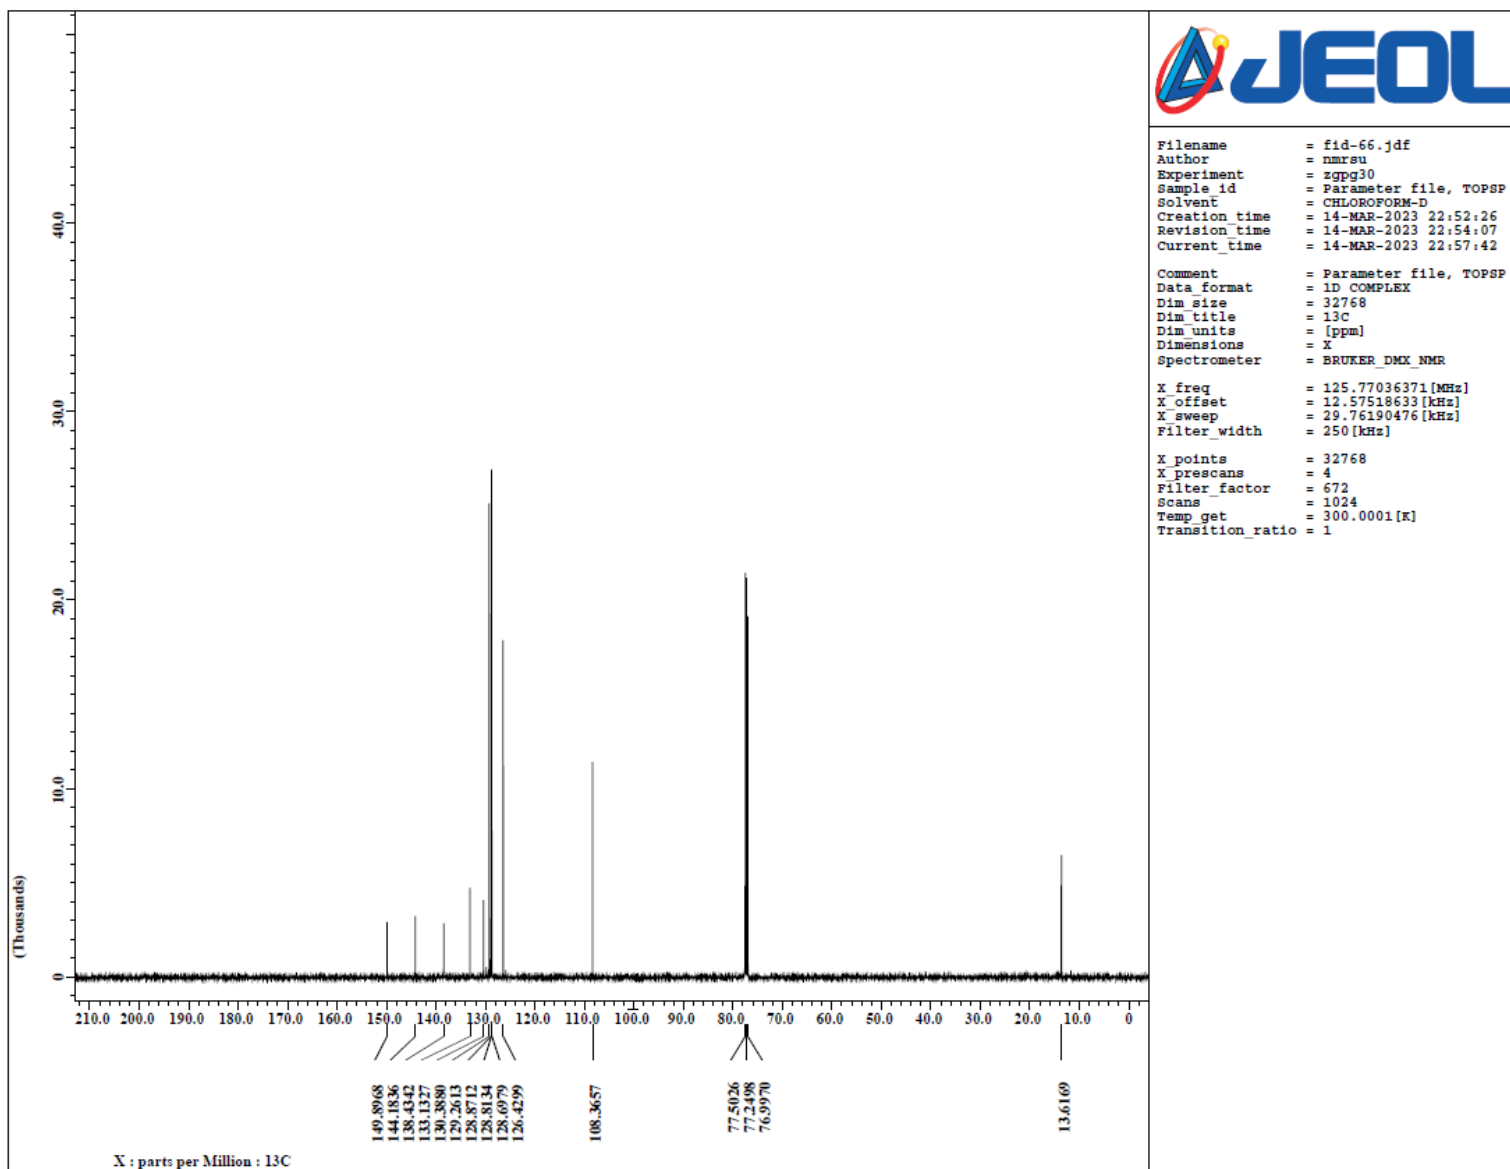

1-(4-chlorophenyl)-3-methyl-5-phenyl-1H-pyrazole (P17): <sup>13</sup>C-NMR (CDCl<sub>3</sub>) \_ Expanded Aromatic Region

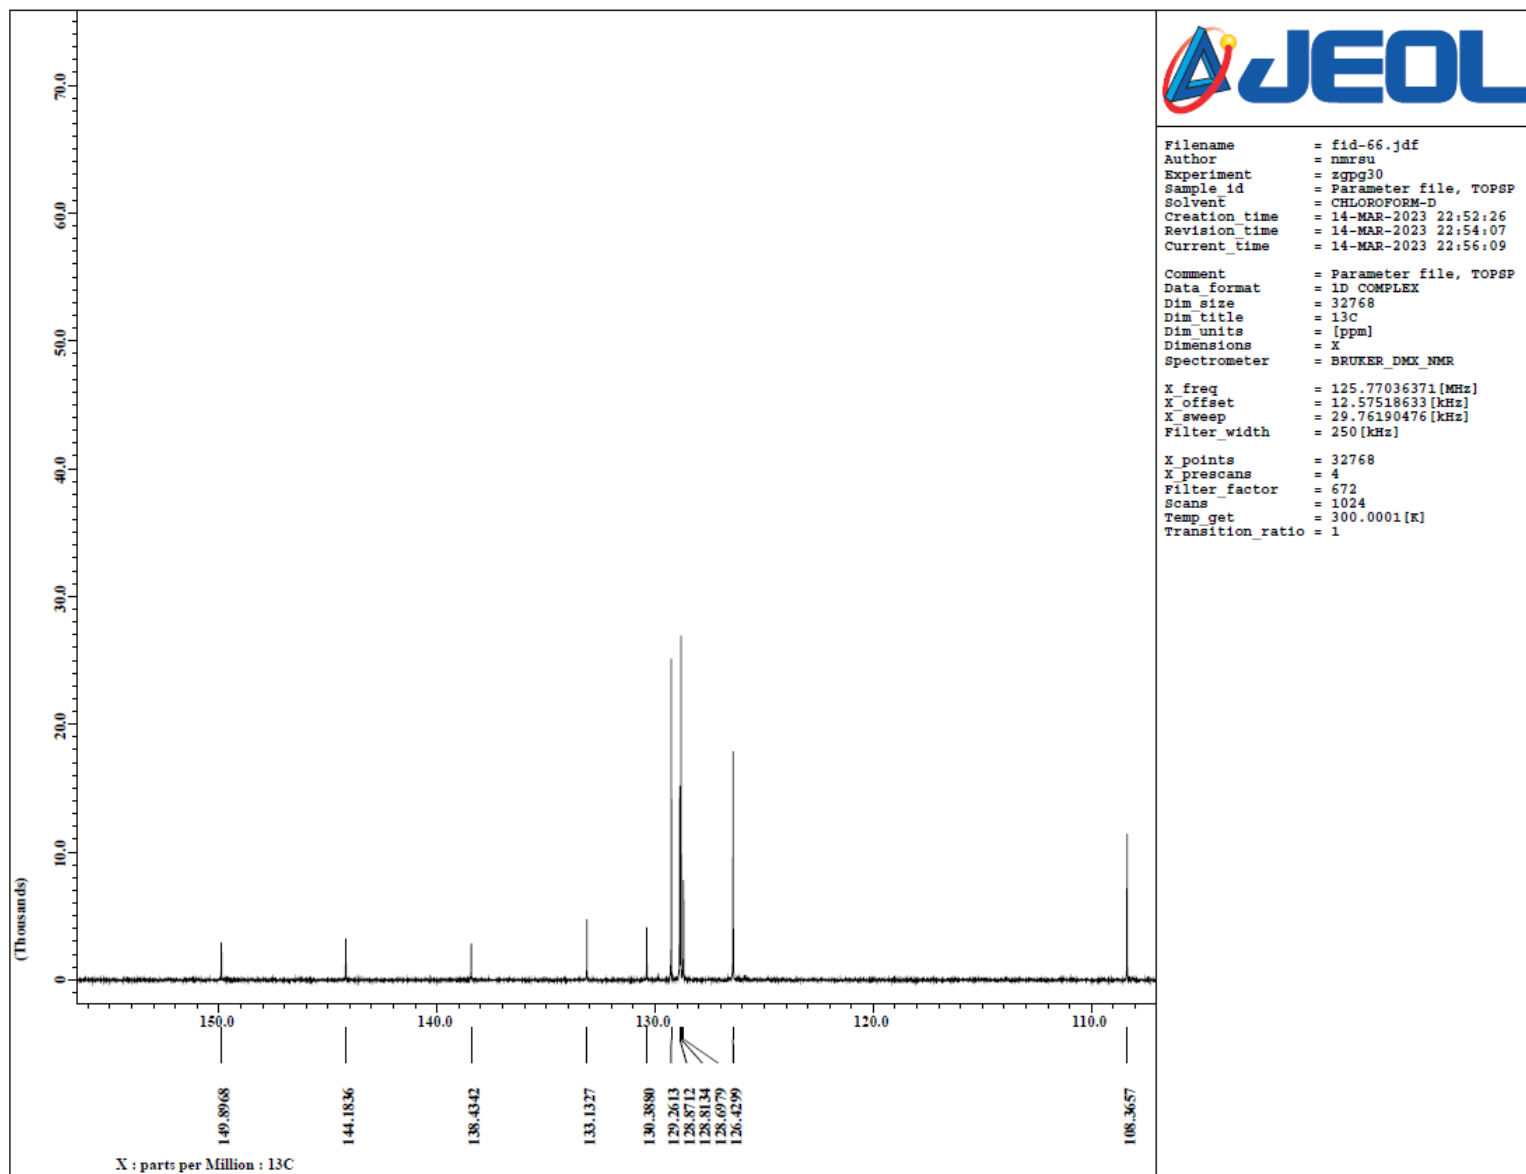

### 1-(4-chlorophenyl)-3-methyl-5-phenyl-1H-pyrazole (P17): ESI-MS

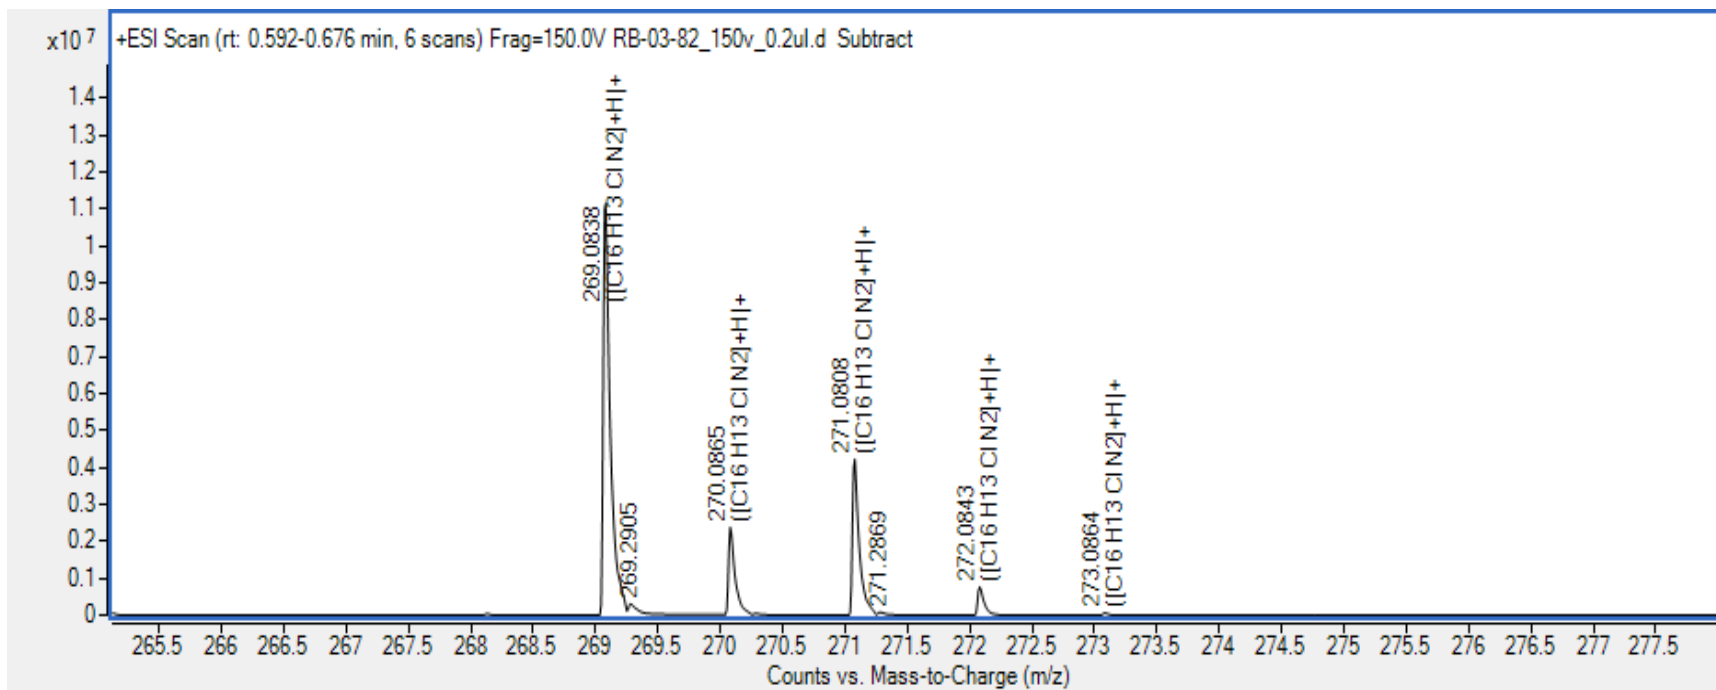

| Formula,       | Species, | m/z,      | Score, | Diff (abs. ppm), | Mass     |
|----------------|----------|-----------|--------|------------------|----------|
| C16 H13 Cl N2, | (M+H)+,  | 269.0838, | 97.12, | 1.28,            | 268.0764 |

1-(4-methoxyphenyl)-3-methyl-5-phenyl-1H-pyrazole (P18): <sup>1</sup>H-NMR (CDCl<sub>3</sub>)

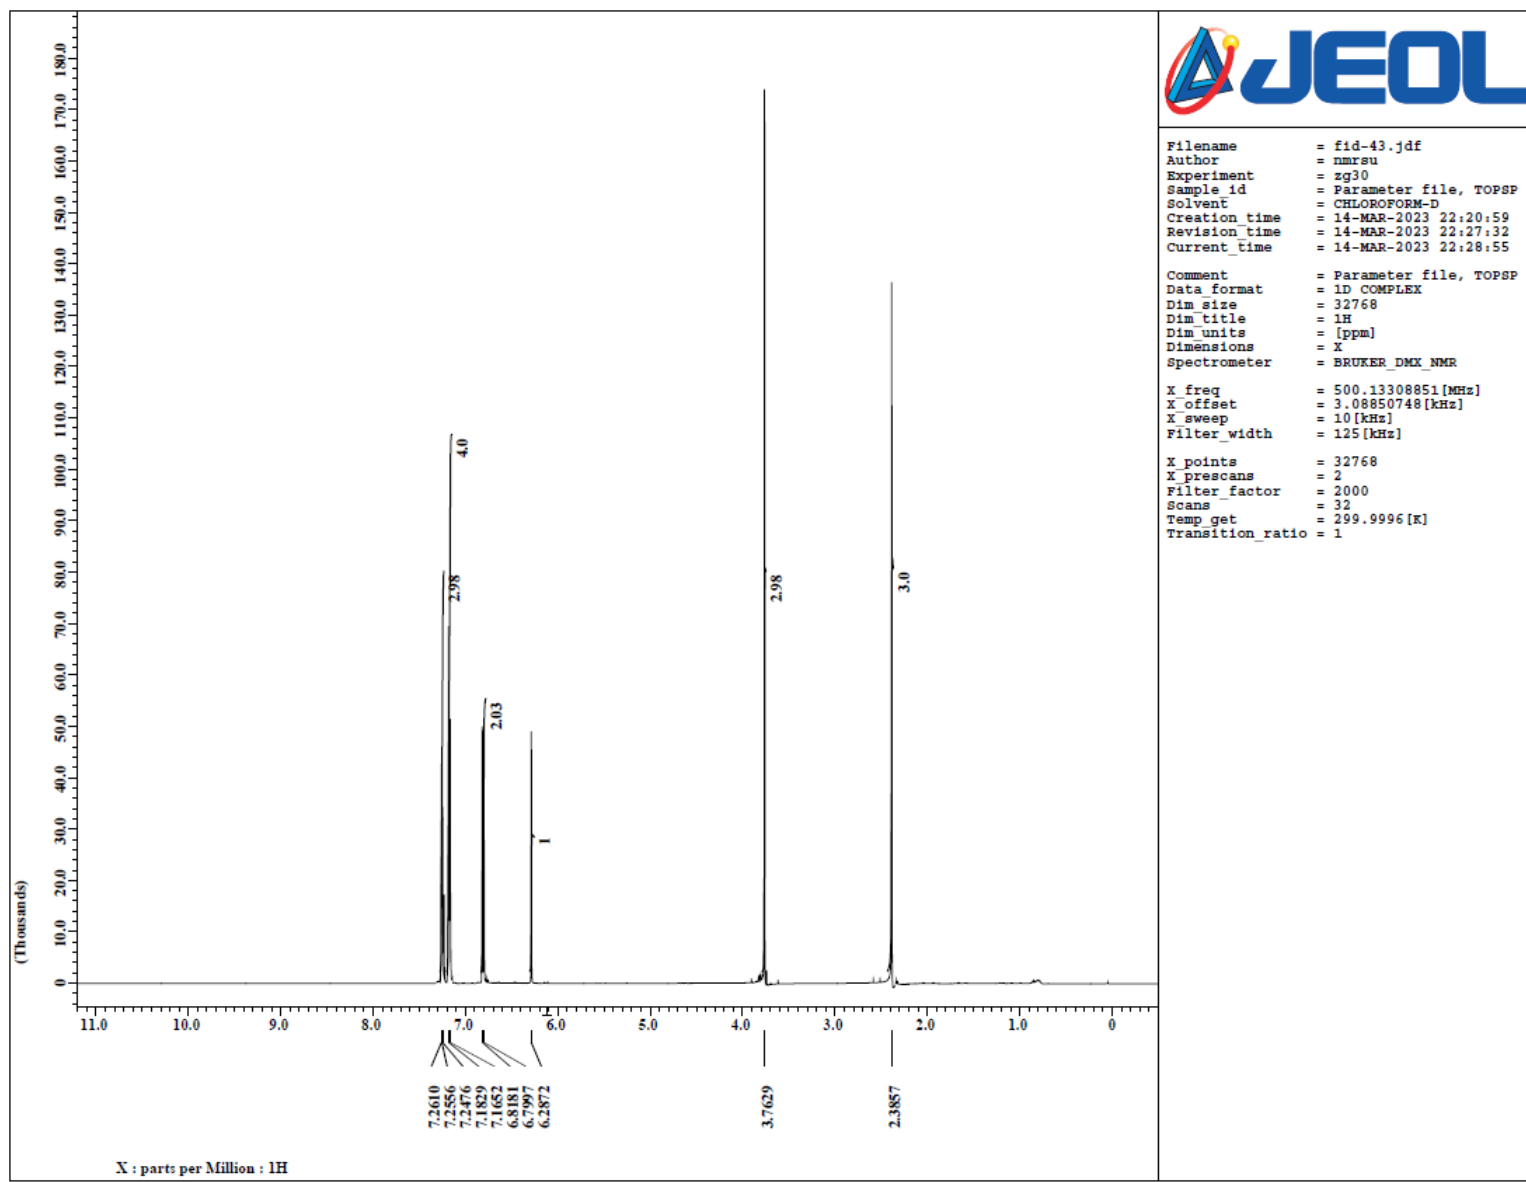



# 1-(4-methoxyphenyl)-3-methyl-5-phenyl-1H-pyrazole (P18): <sup>1</sup>H-NMR (CDCl<sub>3</sub>) \_ Expanded Aromatic Region

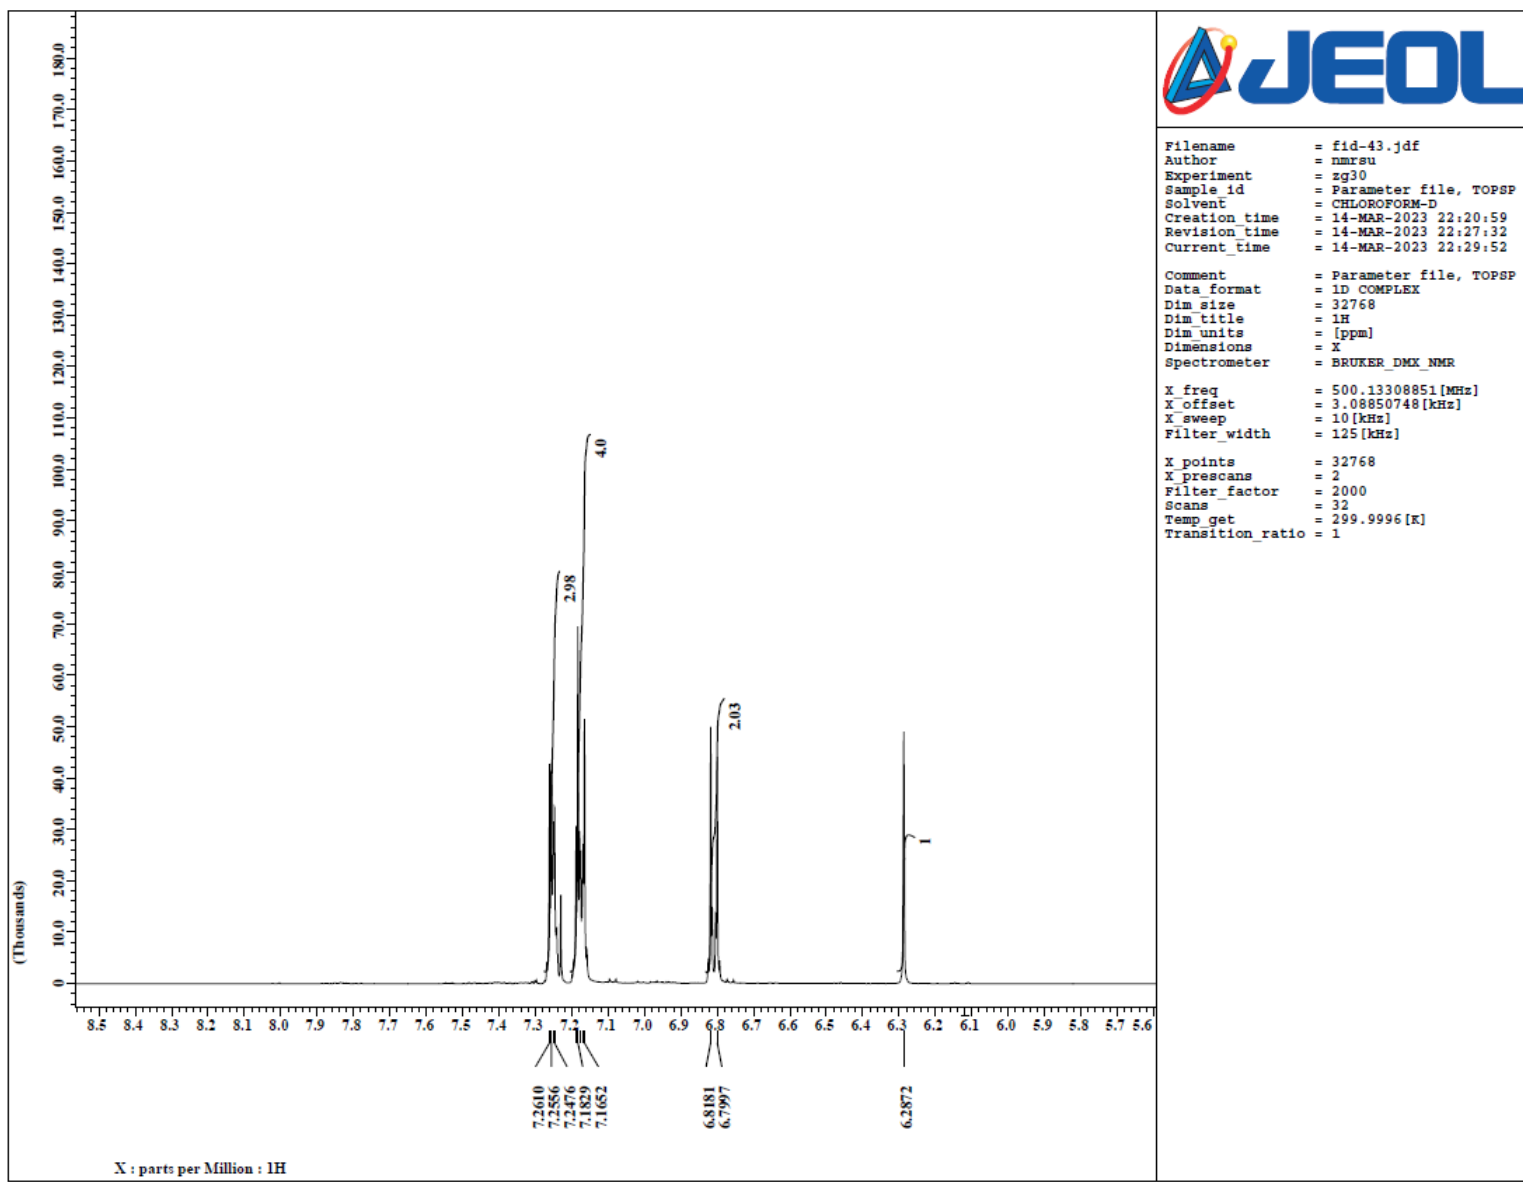

1-(4-methoxyphenyl)-3-methyl-5-phenyl-1H-pyrazole (P18):  $^{13}\text{C}$ -NMR ( $\text{CDCl}_3$ )

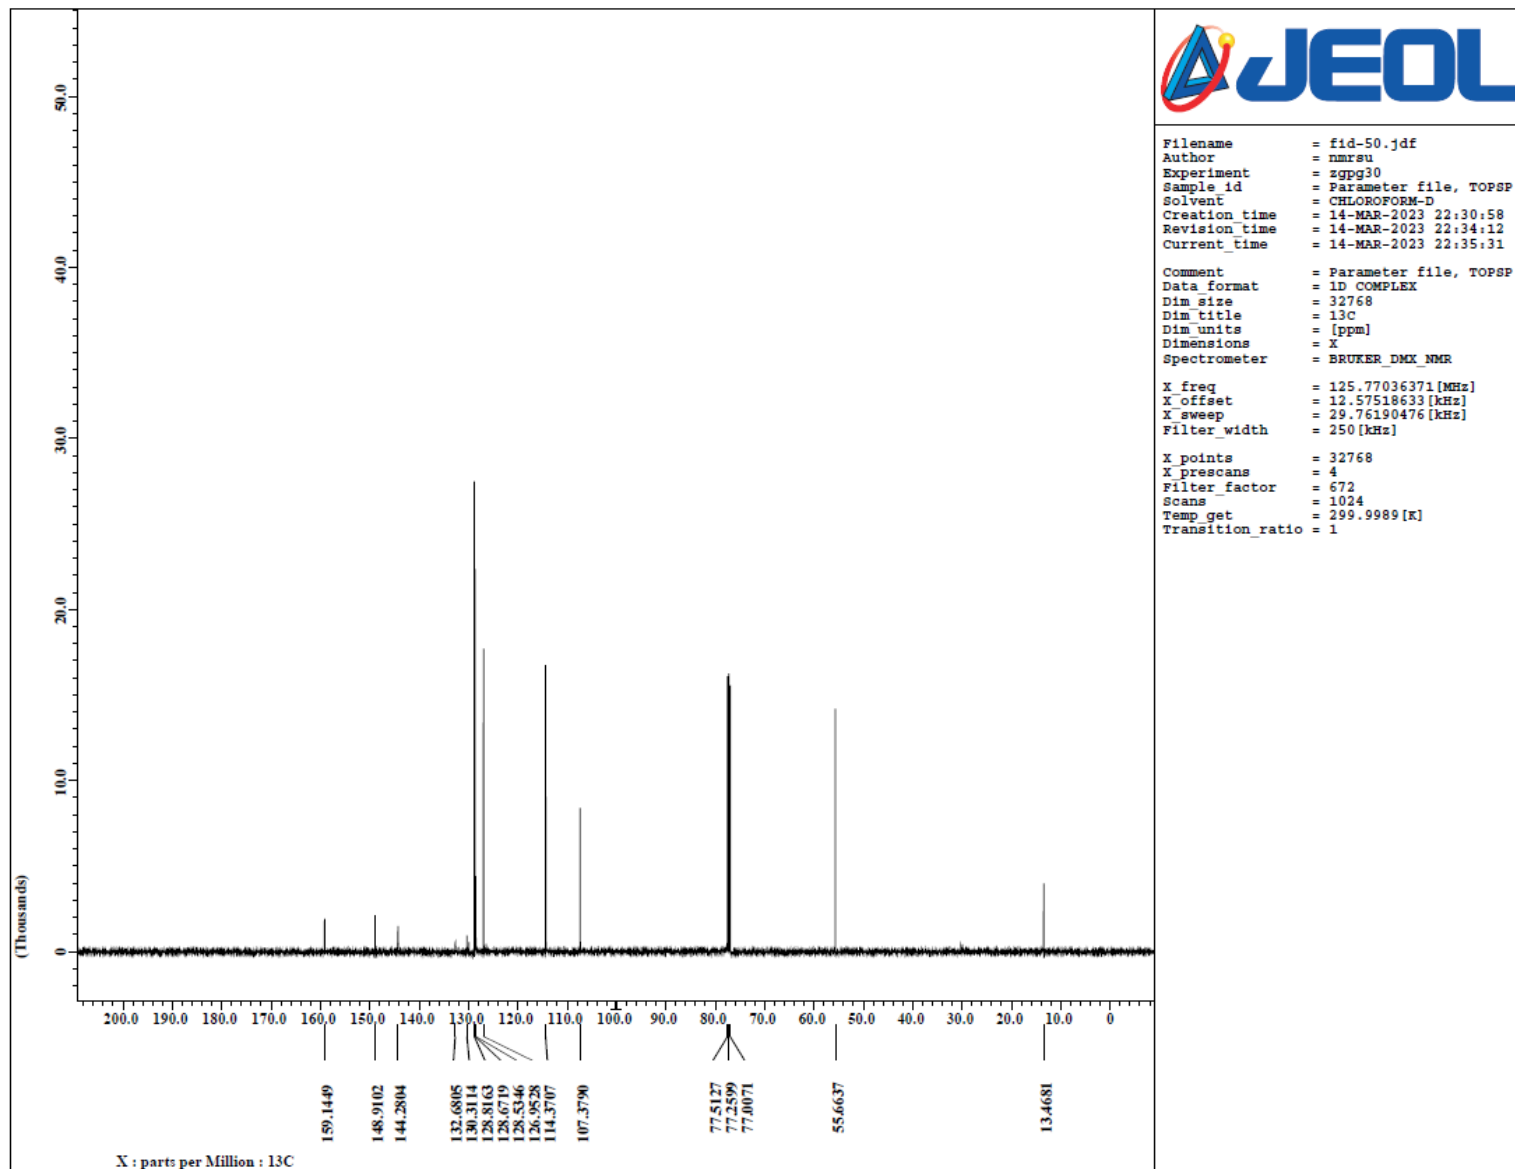

### 1-(4-methoxyphenyl)-3-methyl-5-phenyl-1H-pyrazole (P18): ESI-MS

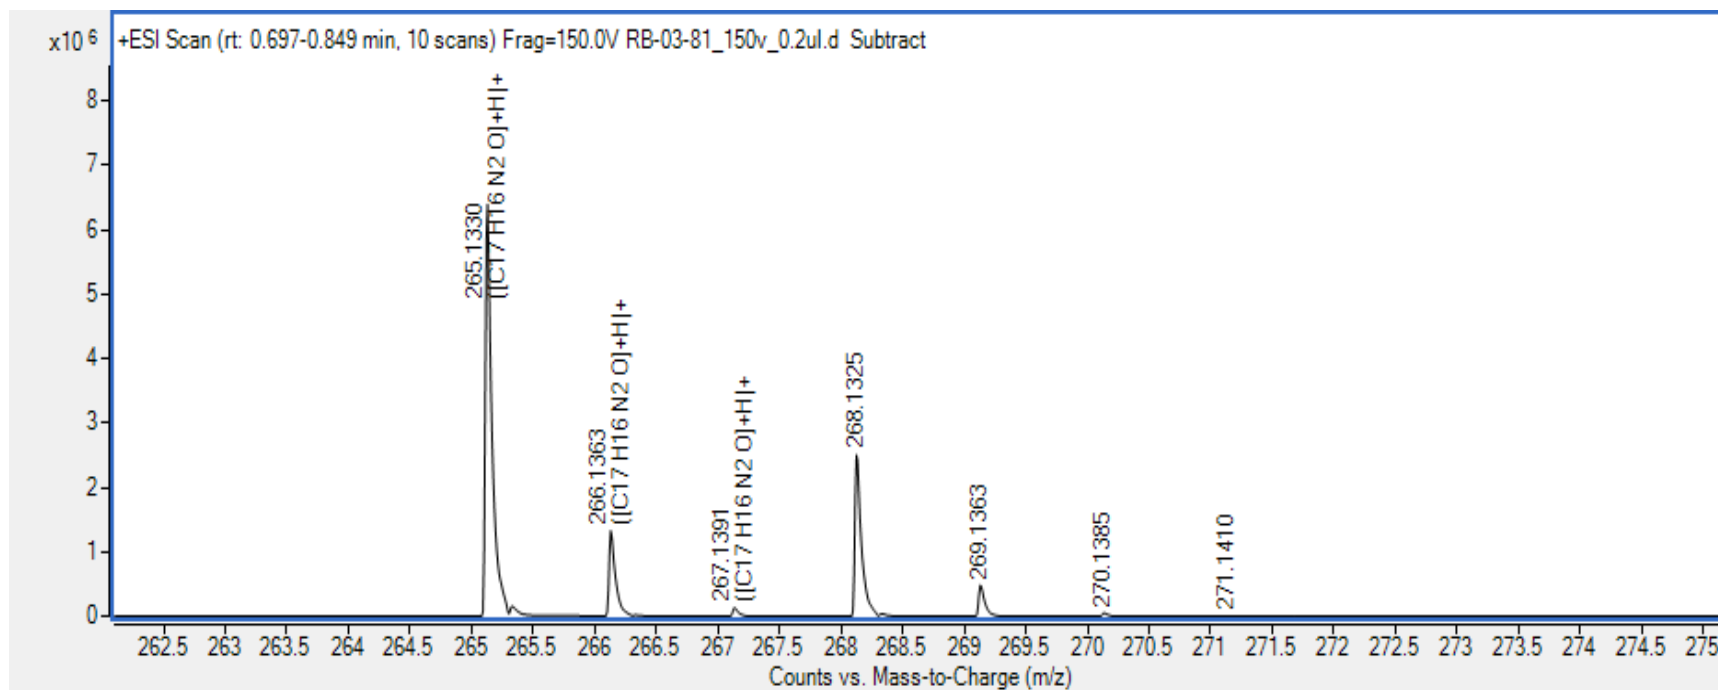

| Formula,      | Species, | m/z,      | Score, | Diff (abs. ppm), | Mass     |
|---------------|----------|-----------|--------|------------------|----------|
| C17 H16 N2 O, | (M+H)+,  | 265.1330, | 98.3,  | 1.94,            | 264.1258 |

# 4-(3-methyl-5-phenyl-1H-pyrazol-1-yl)benzenesulfonamide (P19): <sup>1</sup>H-NMR (CDCl<sub>3</sub>)

<sup>1</sup>H NMR of 83

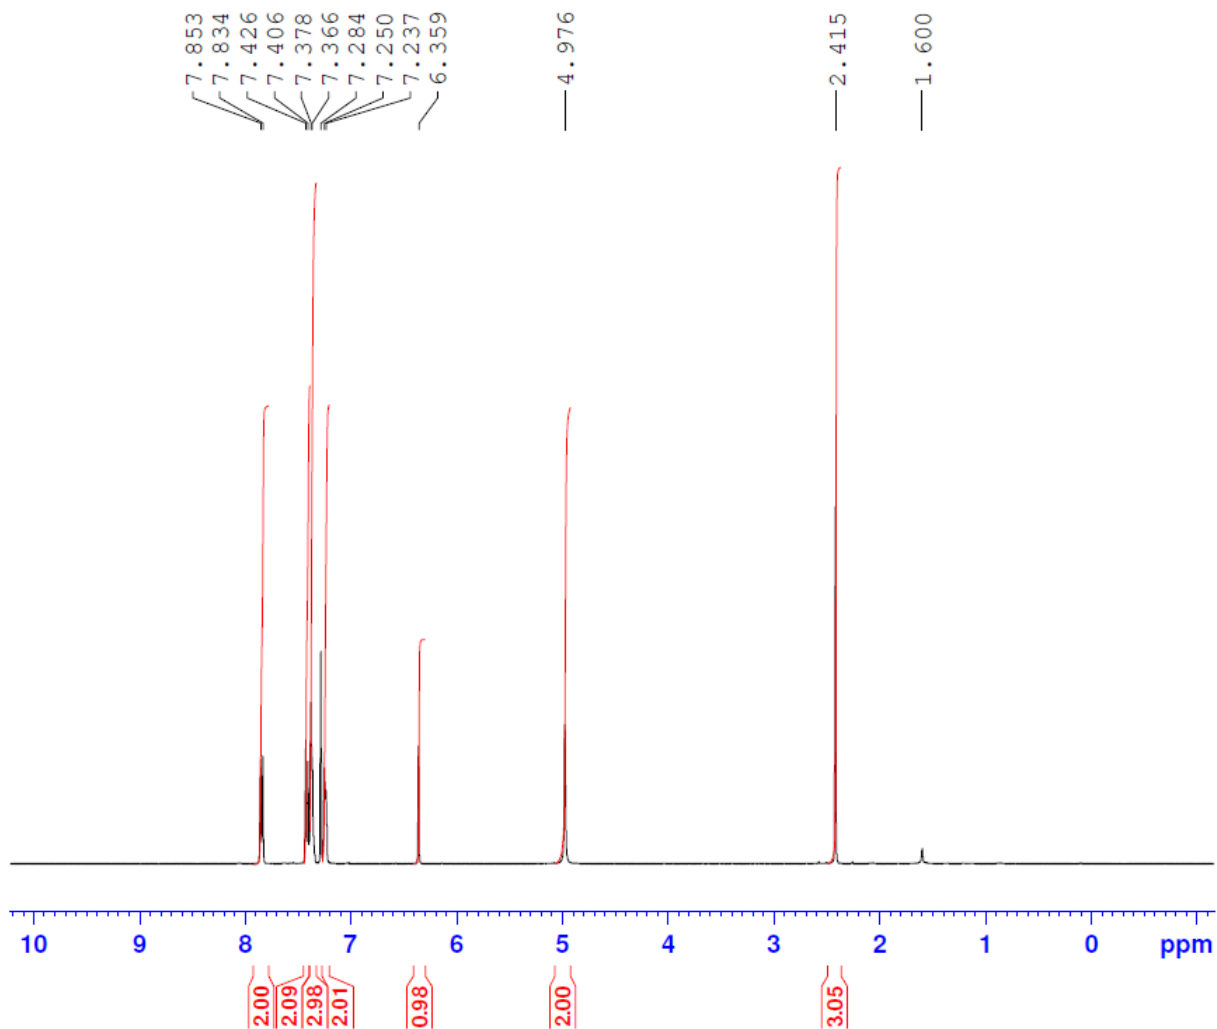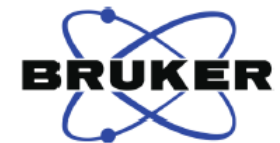

Current Data Parameters  
NAME SM-83\_1H  
EXPNO 10  
PROCNO 1

F2 - Acquisition Parameters  
Date\_ 20230317  
Time 16.44 h  
INSTRUM Avance Neo  
PROBHD Z140678\_0053 (  
PULPROG zg30  
TD 65536  
SOLVENT CDCl3  
NS 16  
DS 2  
SWH 8196.722 Hz  
FIDRES 0.250144 Hz  
AQ 3.9976959 sec  
RG 101  
DW 61.000 usec  
DE 13.54 usec  
TE 296.3 K  
D1 1.00000000 sec  
TD0 1  
SFO1 400.1424709 MHz  
NUC1 1H  
P0 3.33 usec  
P1 10.00 usec  
PLW1 22.64200020 W

F2 - Processing parameters  
SI 65536  
SF 400.1400000 MHz  
WDW EM  
SSB 0  
LB 0.30 Hz  
GB 0  
PC 1.00

# 4-(3-methyl-5-phenyl-1H-pyrazol-1-yl)benzenesulfonamide (P19): <sup>1</sup>H-NMR (CDCl<sub>3</sub>) \_ Expanded Aromatic Region

<sup>1</sup>H NMR of 83

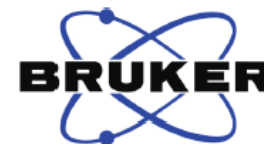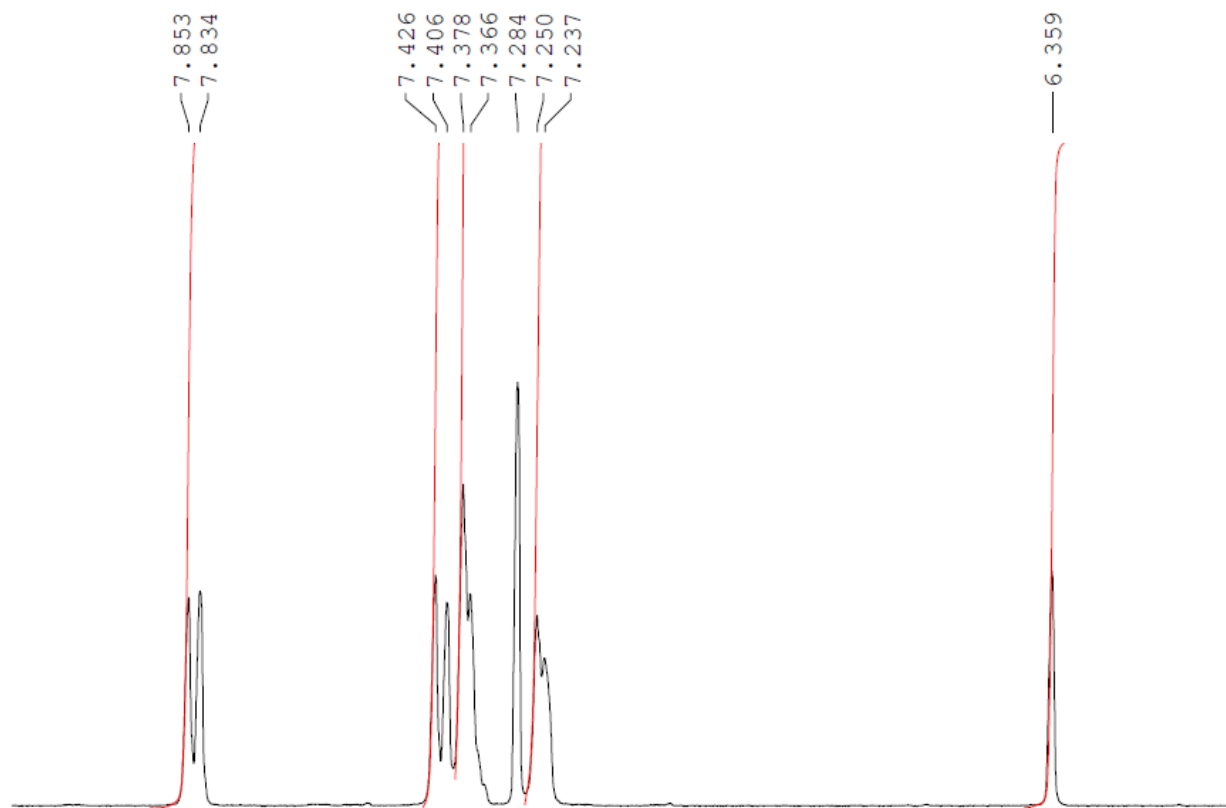

Current Data Parameters  
NAME SM-83\_1H  
EXPNO 10  
PROCNO 1

F2 - Acquisition Parameters  
Date\_ 20230317  
Time 16.44 h  
INSTRUM Avance Neo  
PROBHD Z140678\_0053 ( )  
PULPROG zg30  
TD 65536  
SOLVENT CDCl3  
NS 16  
DS 2  
SWH 8196.722 Hz  
FIDRES 0.250144 Hz  
AQ 3.9976959 sec  
RG 101  
DW 61.000 usec  
DE 13.54 usec  
TE 296.3 K  
D1 1.0000000 sec  
TD0 1  
SFO1 400.1424709 MHz  
NUC1 1H  
P0 3.33 usec  
P1 10.00 usec  
PLW1 22.64200020 W

F2 - Processing parameters  
SI 65536  
SF 400.1400000 MHz  
WDW EM  
SSB 0  
LB 0.30 Hz  
GB 0  
PC 1.00

4-(3-methyl-5-phenyl-1H-pyrazol-1-yl)benzenesulfonamide (P19):  $^{13}\text{C}$ -NMR ( $\text{CDCl}_3$ )

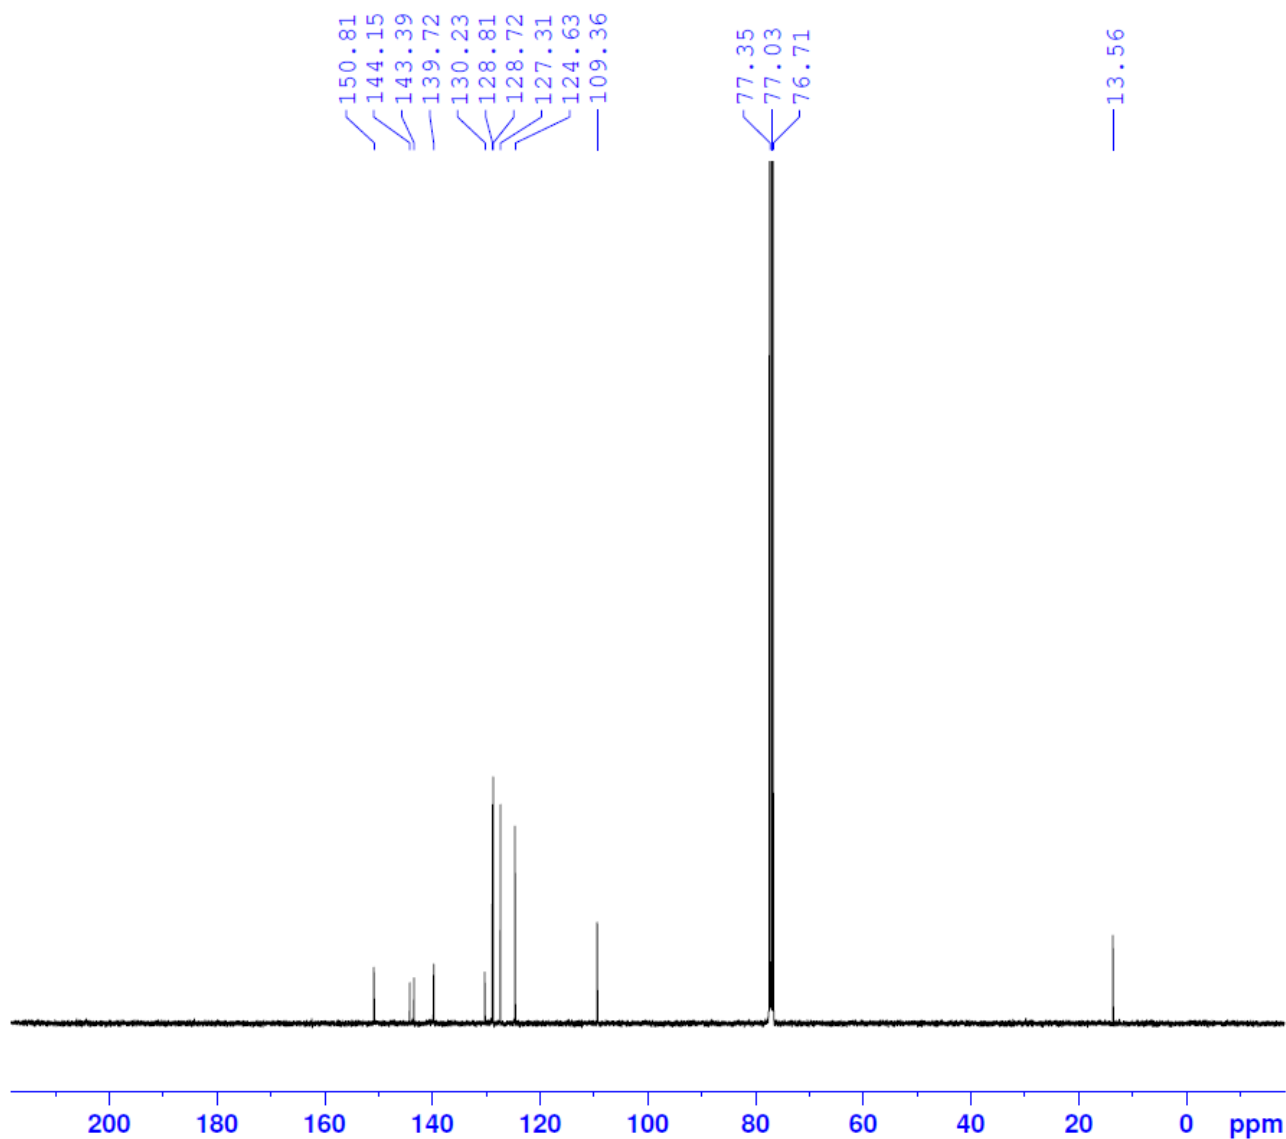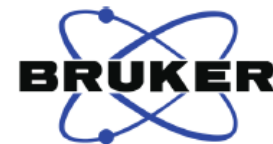

Current Data Parameters  
 NAME SM-83\_1Hand13C  
 EXPNO 11  
 PROCNO 1

F2 - Acquisition Parameters  
 Date\_ 20230317  
 Time 21.20 h  
 INSTRUM Avance Neo  
 PROBHD Z140678\_0053 ( )  
 PULPROG zgpg30  
 TD 65536  
 SOLVENT CDCl3  
 NS 4096  
 DS 4  
 SWH 23809.523 Hz  
 FIDRES 0.726609 Hz  
 AQ 1.3762560 sec  
 RG 16  
 DW 21.000 usec  
 DE 6.50 usec  
 TE 297.2 K  
 D1 2.00000000 sec  
 D11 0.03000000 sec  
 TD0 1  
 SFO1 100.6253446 MHz  
 NUC1 13C  
 P0 3.33 usec  
 P1 10.00 usec  
 PLW1 77.80000305 W  
 SFO2 400.1416006 MHz  
 NUC2 1H  
 CPDPRG[2] waltz65  
 PCPD2 90.00 usec  
 PLW2 22.64200020 W  
 PLW12 0.27952999 W  
 PLW13 0.14060000 W

F2 - Processing parameters  
 SI 32768  
 SF 100.6152830 MHz  
 WDW EM  
 SSB 0  
 LB 1.00 Hz  
 GB 0  
 PC 1.40

4-(3-methyl-5-phenyl-1H-pyrazol-1-yl)benzenesulfonamide (P19):  $^{13}\text{C}$ -NMR ( $\text{CDCl}_3$ ) \_ Expanded Aromatic Region

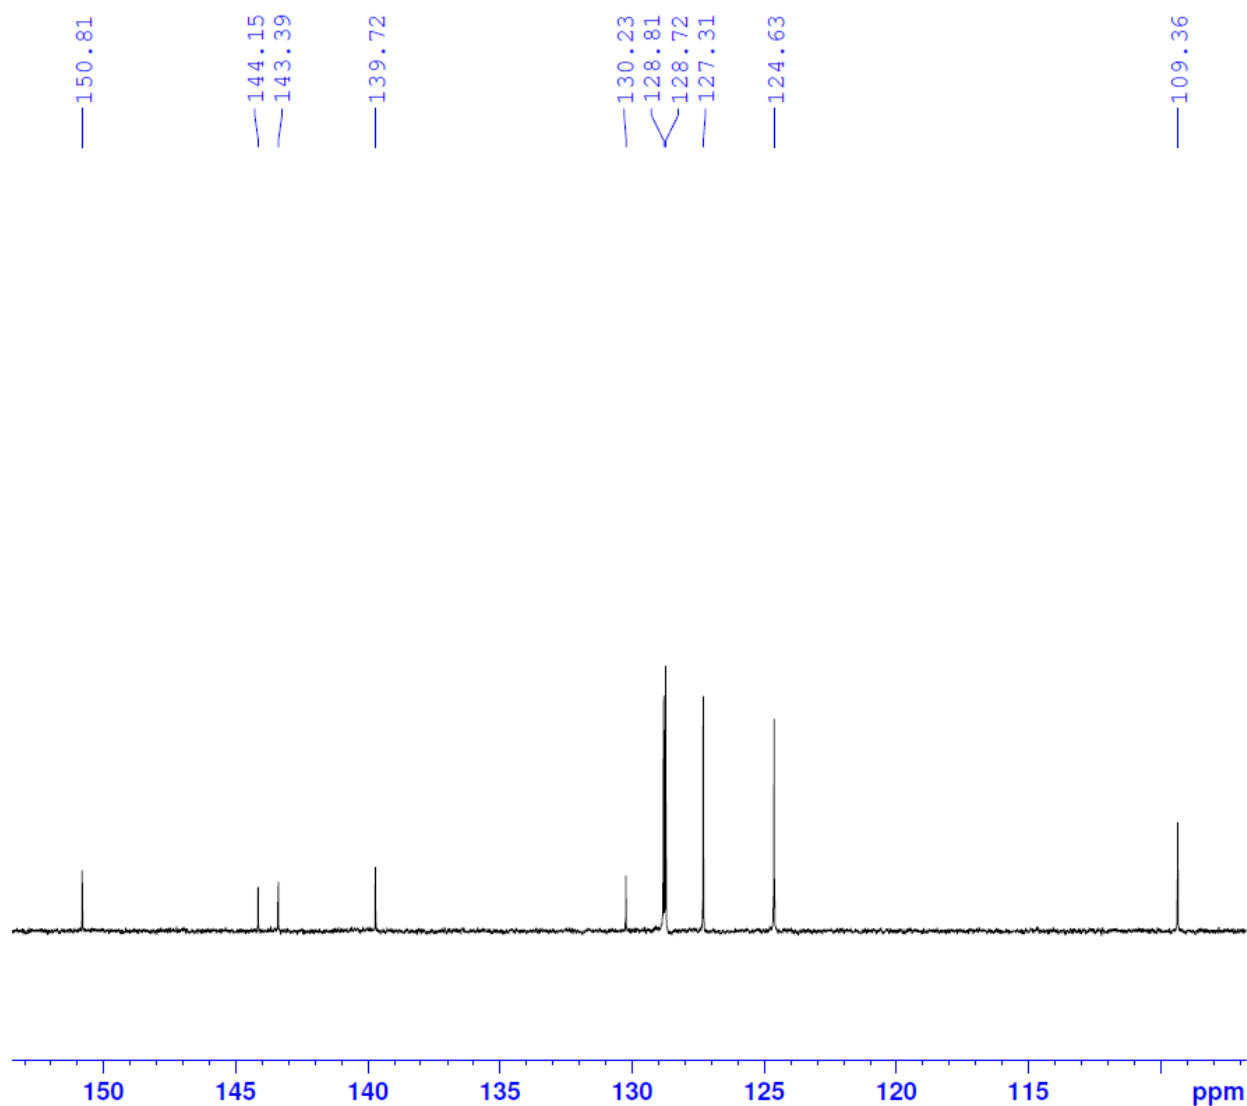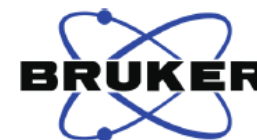

Current Data Parameters  
 NAME SM-83\_1Hand13C  
 EXPNO 11  
 PROCNO 1

F2 - Acquisition Parameters  
 Date\_ 20230317  
 Time 21.20 h  
 INSTRUM Avance Neo  
 PROBHD z140678\_0053 (  
 PULPROG zgpg30  
 TD 65536  
 SOLVENT  $\text{CDCl}_3$   
 NS 4096  
 DS 4  
 SWH 23809.523 Hz  
 FIDRES 0.726609 Hz  
 AQ 1.3762560 sec  
 RG 16  
 DW 21.000 usec  
 DE 6.50 usec  
 TE 297.2 K  
 D1 2.00000000 sec  
 D11 0.03000000 sec  
 TD0 1  
 SFO1 100.6253446 MHz  
 NUC1  $^{13}\text{C}$   
 P0 3.33 usec  
 P1 10.00 usec  
 PLW1 77.80000305 W  
 SFO2 400.1416006 MHz  
 NUC2  $^1\text{H}$   
 CPDPRG[2] waltz65  
 PCPD2 90.00 usec  
 PLW2 22.64200020 W  
 PLW12 0.27952999 W  
 PLW13 0.14060000 W

F2 - Processing parameters  
 SI 32768  
 SF 100.6152830 MHz  
 WDW EM  
 SSB 0  
 LB 1.00 Hz  
 GB 0  
 PC 1.40

#### 4-(3-methyl-5-phenyl-1H-pyrazol-1-yl)benzenesulfonamide (P19): ESI-MS

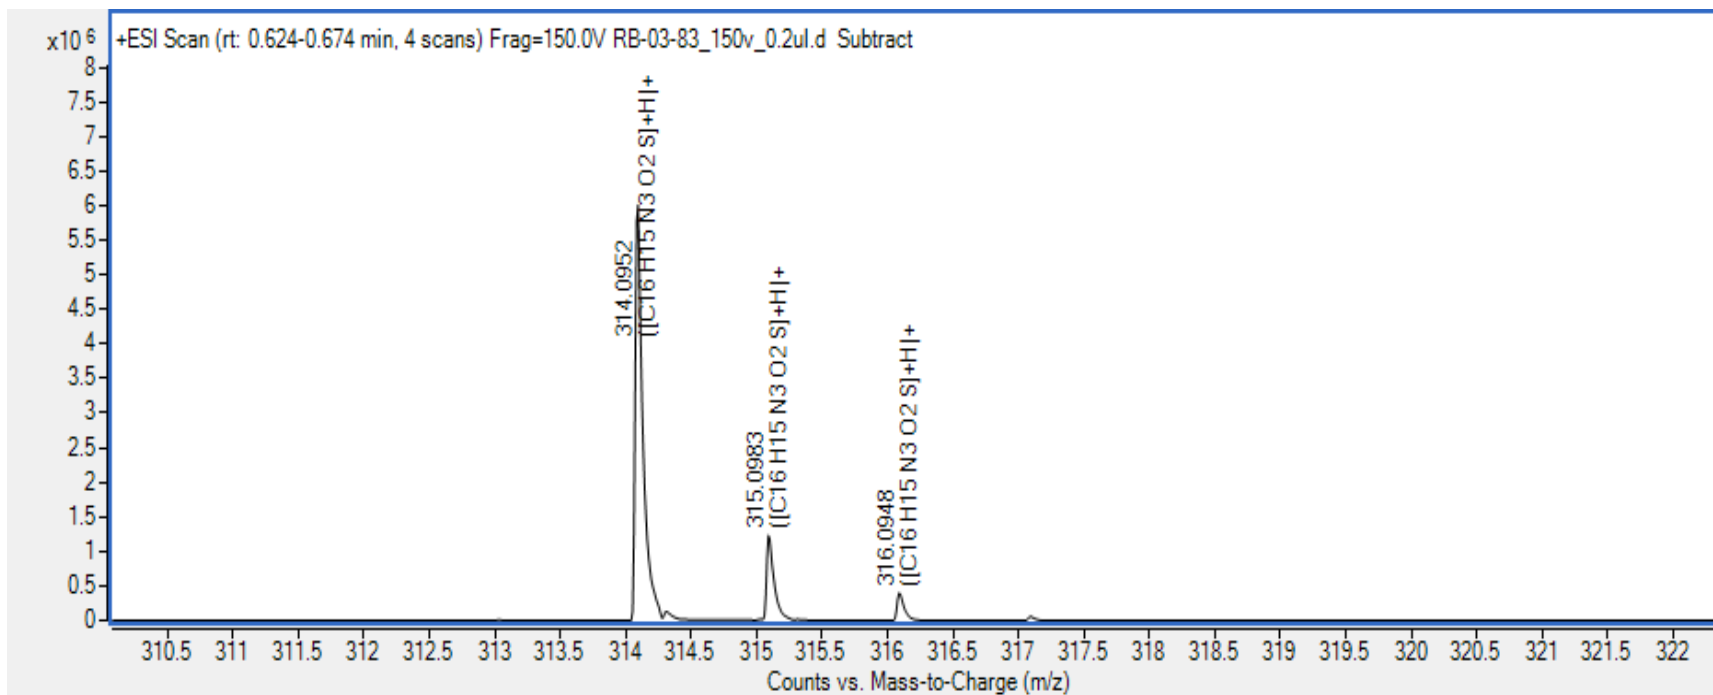

| Formula,         | Species, | m/z,      | Score, | Diff (abs. ppm), | Mass    |
|------------------|----------|-----------|--------|------------------|---------|
| C16 H15 N3 O2 S, | (M+H)+,  | 314.0952, | 98.14, | 1.61,            | 313.088 |
